# Supplementary material
Source: publisher figshare collection journal article supplement (https://gsajournals.figshare.com/ndownloader/files/20276265)
Supplement: Supplementary file 1 [file 20276265]

## Sheet: Upregulated DEGs in mop1-1
FileS6.1: Genome-wide siRNA changes in mop1-1 mutant (pvalue < 0.05, FDR < 0.05). 231 out of 977 upregulated DEGs in mop1-1 mutant show depletion of 24-nt siRNAs.
Gene_id_v4	log2FC	log2CPM	F	PValue	FDR	Normalized logFC
Zm00001d013907	-1.00872	5.23411	8.61245	0.0165524	0.0450775	-0.892674
Zm00001d040075	-1.11787	4.32645	8.3555	0.0177871	0.0477608	-0.989264
Zm00001d037941	-1.17711	5.43244	12.4676	0.00635994	0.0217669	-1.04169
Zm00001d040285	-1.23379	4.02898	8.27969	0.018173	0.0485282	-1.09185
Zm00001d025055	-1.30944	5.21707	12.231	0.00670638	0.0226573	-1.1588
Zm00001d018178	-1.32178	4.46773	8.21229	0.0185247	0.0492189	-1.16972
Zm00001d028601	-1.3331	4.09703	11.0176	0.00889624	0.0279803	-1.17974
Zm00001d038913	-1.33314	5.47252	10.0083	0.0114209	0.0339529	-1.17977
Zm00001d043782	-1.36672	4.63503	14.1166	0.00446893	0.0166051	-1.20948
Zm00001d008923	-1.40112	4.02948	11.0398	0.00884888	0.0278806	-1.23993
Zm00001d044159	-1.41841	3.73471	10.8259	0.00931828	0.0289907	-1.25523
Zm00001d051584	-1.43634	4.05772	12.6036	0.00617083	0.0212723	-1.27109
Zm00001d029975	-1.44206	4.81936	9.88451	0.011788	0.0347565	-1.27616
Zm00001d017422	-1.4463	4.1767	11.3256	0.00826604	0.0265172	-1.27991
Zm00001d051267	-1.46124	3.59899	10.4835	0.0101353	0.0309565	-1.29313
Zm00001d002351	-1.46364	5.15612	14.2192	0.00437586	0.0163447	-1.29526
Zm00001d013208	-1.47345	3.16904	8.39921	0.0175692	0.047284	-1.30394
Zm00001d016299	-1.48562	5.20626	17.7424	0.00224329	0.00987634	-1.3147
Zm00001d037939	-1.50245	4.61216	8.99215	0.0149152	0.041651	-1.3296
Zm00001d021490	-1.50939	3.42904	10.0173	0.0113945	0.0338898	-1.33575
Zm00001d025964	-1.51733	3.63169	10.2521	0.0107378	0.032355	-1.34277
Zm00001d009090	-1.5177	4.21237	8.80287	0.0157051	0.0433646	-1.34309
Zm00001d022926	-1.55725	3.9975	13.5498	0.00502933	0.0182033	-1.37809
Zm00001d051526	-1.57567	4.02415	13.4271	0.00516174	0.0185726	-1.3944
Zm00001d003186	-1.58807	4.76517	11.5179	0.00790034	0.0256054	-1.40537
Zm00001d011144	-1.59325	3.88822	12.1693	0.00680047	0.022902	-1.40996
Zm00001d043730	-1.59403	4.59663	10.4358	0.0102559	0.0312397	-1.41064
Zm00001d045948	-1.61939	3.72721	13.6561	0.00491789	0.0178777	-1.43309
Zm00001d052268	-1.62806	4.89521	17.344	0.00240763	0.0104124	-1.44076
Zm00001d033256	-1.62993	4.51947	10.2218	0.0108198	0.0325442	-1.44242
Zm00001d020137	-1.63718	3.74169	13.657	0.00491698	0.0178763	-1.44883
Zm00001d004220	-1.6416	4.76398	20.1572	0.00149454	0.00724424	-1.45275
Zm00001d003457	-1.64249	4.89763	13.3546	0.00524205	0.0187838	-1.45353
Zm00001d036766	-1.65102	3.94739	12.8983	0.00578404	0.0202439	-1.46108
Zm00001d037730	-1.66156	5.05784	13.0018	0.00565527	0.0199036	-1.47041
Zm00001d032745	-1.67746	4.40786	11.12	0.00868024	0.0275043	-1.48448
Zm00001d028808	-1.67903	4.69589	19.4346	0.00168122	0.00791189	-1.48586
Zm00001d025360	-1.67946	3.32271	9.33097	0.0136198	0.0387978	-1.48625
Zm00001d014625	-1.69599	3.78965	12.3753	0.00649245	0.0220909	-1.50088
Zm00001d052458	-1.71476	4.01157	9.8614	0.0118582	0.0349063	-1.51749
Zm00001d035505	-1.73791	4.31371	16.6019	0.002755	0.0115212	-1.53797
Zm00001d018191	-1.74913	3.83312	15.9729	0.0030986	0.0126007	-1.5479
Zm00001d013501	-1.74957	4.88709	10.7923	0.00939468	0.0291797	-1.54829
Zm00001d014491	-1.75416	5.03573	20.0732	0.00151489	0.00731658	-1.55235
Zm00001d038695	-1.76255	3.81897	10.0979	0.0111637	0.0333633	-1.55978
Zm00001d010493	-1.76261	5.24249	22.658	0.00101702	0.00541992	-1.55983
Zm00001d038860	-1.76524	4.56882	20.8102	0.00134726	0.00671365	-1.56216
Zm00001d050323	-1.76971	5.06727	16.86	0.00262762	0.011124	-1.56611
Zm00001d048635	-1.77691	4.56772	11.2015	0.00851318	0.0271199	-1.57249
Zm00001d003167	-1.80362	4.71328	21.9688	0.00112717	0.00586379	-1.59612
Zm00001d014517	-1.81687	3.8761	15.4084	0.00345264	0.0136397	-1.60785
Zm00001d043709	-1.81963	2.79668	9.1412	0.0143274	0.0403523	-1.61029
Zm00001d002999	-1.82037	4.52499	13.564	0.00501422	0.0181553	-1.61095
Zm00001d020607	-1.82083	3.43864	11.2535	0.0084085	0.0268542	-1.61136
Zm00001d015767	-1.82978	3.45981	10.6497	0.00972818	0.0299867	-1.61927
Zm00001d023327	-1.83729	3.18535	8.18051	0.0186935	0.0495697	-1.62592
Zm00001d003116	-1.83896	4.23923	16.7669	0.00267274	0.0112675	-1.6274
Zm00001d047453	-1.83919	4.07713	18.0482	0.00212635	0.00947344	-1.6276
Zm00001d019163	-1.8397	4.59802	14.6876	0.00397982	0.0151827	-1.62805
Zm00001d032906	-1.85616	3.4815	8.96362	0.0150311	0.0419028	-1.64262
Zm00001d023269	-1.86458	4.07388	9.21859	0.0140335	0.039696	-1.65007
Zm00001d029366	-1.87129	4.69918	9.30908	0.0136992	0.0389616	-1.65601
Zm00001d006476	-1.87609	4.40457	20.1965	0.00148513	0.00721472	-1.66025
Zm00001d030550	-1.88198	4.42076	22.829	0.000991757	0.00531992	-1.66547
Zm00001d051659	-1.88631	3.2404	9.15117	0.0142891	0.0402748	-1.6693
Zm00001d012413	-1.888	3.49393	12.3591	0.00651603	0.0221596	-1.67079
Zm00001d037768	-1.89073	4.1317	19.9756	0.00153897	0.0074057	-1.67322
Zm00001d026029	-1.9369	3.26738	13.272	0.00533536	0.0190252	-1.71407
Zm00001d043596	-1.94377	2.8986	10.141	0.0110426	0.0330696	-1.72015
Zm00001d017989	-1.96305	3.80047	15.514	0.00338282	0.013441	-1.73721
Zm00001d009568	-1.96719	4.59117	21.5664	0.00119823	0.00614282	-1.74088
Zm00001d009382	-1.96823	4.19572	17.8137	0.00221531	0.00977626	-1.7418
Zm00001d047931	-1.97106	4.79963	15.1317	0.00364424	0.0142116	-1.7443
Zm00001d026414	-1.97256	4.59558	19.9748	0.00153916	0.0074057	-1.74563
Zm00001d053305	-1.98579	3.84548	15.6259	0.00331064	0.0132216	-1.75733
Zm00001d031878	-1.98912	5.52795	27.9159	0.000497384	0.00318297	-1.76028
Zm00001d016982	-1.99914	5.04875	28.3931	0.000468604	0.00304967	-1.76915
Zm00001d005609	-2.01116	2.95433	9.85027	0.0118922	0.0349819	-1.77979
Zm00001d000203	-2.03331	4.81218	18.6363	0.00192179	0.00877692	-1.79939
Zm00001d020345	-2.05114	4.24042	12.1866	0.00677392	0.0228345	-1.81517
Zm00001d034777	-2.05675	4.24502	20.3155	0.00145711	0.00711196	-1.82013
Zm00001d007341	-2.05823	4.23418	14.5439	0.00409648	0.015523	-1.82144
Zm00001d047882	-2.06068	4.79199	23.2164	0.000937319	0.00510276	-1.82361
Zm00001d037057	-2.06385	4.54891	17.9435	0.00216555	0.00960216	-1.82641
Zm00001d033314	-2.08397	4.32846	11.5489	0.00784324	0.0254731	-1.84422
Zm00001d031203	-2.11602	3.05663	10.3546	0.0104657	0.0317109	-1.87259
Zm00001d009140	-2.11766	4.83963	27.5069	0.000523789	0.00330918	-1.87403
Zm00001d032144	-2.12681	5.23903	32.4097	0.000292099	0.0021394	-1.88213
Zm00001d025847	-2.12884	4.32935	22.4698	0.00104575	0.0055374	-1.88393
Zm00001d040422	-2.13763	2.55892	9.77404	0.0121282	0.0355025	-1.89171
Zm00001d015477	-2.16232	3.70775	8.43829	0.0173772	0.0468494	-1.91356
Zm00001d014481	-2.16654	3.47192	13.6059	0.00497011	0.0180323	-1.91729
Zm00001d040619	-2.17299	2.58773	9.84264	0.0119156	0.0350401	-1.923
Zm00001d011461	-2.17505	3.10565	11.579	0.00778832	0.0253431	-1.92483
Zm00001d005841	-2.17899	3.46786	14.722	0.00395253	0.0151006	-1.92831
Zm00001d003125	-2.20743	4.80305	28.751	0.000448345	0.00294648	-1.95348
Zm00001d052961	-2.20832	3.50667	14.164	0.00442563	0.0164905	-1.95427
Zm00001d033636	-2.21306	5.04424	35.5467	0.000208439	0.00165827	-1.95846
Zm00001d017880	-2.22739	4.03341	15.0728	0.00368676	0.0143363	-1.97114
Zm00001d002283	-2.23128	2.63617	9.81306	0.0120067	0.0352365	-1.97458
Zm00001d025751	-2.24299	5.25388	38.0036	0.00016271	0.0013888	-1.98495
Zm00001d053815	-2.25644	4.96733	30.4184	0.000366948	0.00254955	-1.99685
Zm00001d021943	-2.31365	4.07965	18.6394	0.00192079	0.0087734	-2.04748
Zm00001d048629	-2.31978	4.31944	27.9622	0.000494499	0.00316865	-2.0529
Zm00001d011126	-2.32032	4.62878	24.435	0.000788335	0.00450217	-2.05338
Zm00001d025932	-2.325	5.91294	44.2669	9.15e-05	0.00090955	-2.05752
Zm00001d027520	-2.32636	3.57642	18.9573	0.00182029	0.00841952	-2.05872
Zm00001d030133	-2.328	4.35163	14.1552	0.00443361	0.0165109	-2.06017
Zm00001d047900	-2.34749	4.3554	21.7504	0.00116507	0.00601618	-2.07742
Zm00001d049171	-2.36468	3.59421	9.81955	0.0119866	0.0351934	-2.09264
Zm00001d017762	-2.38416	5.05412	21.2467	0.00125864	0.00637236	-2.10987
Zm00001d020133	-2.38586	5.64029	26.5046	0.000596119	0.00365805	-2.11138
Zm00001d040190	-2.38755	3.62766	19.8484	0.00157106	0.00752736	-2.11287
Zm00001d012515	-2.403	2.7616	8.96118	0.015041	0.0419245	-2.12655
Zm00001d039077	-2.41917	4.16852	19.6193	0.00163091	0.00773468	-2.14086
Zm00001d016950	-2.4305	2.78442	8.86447	0.0154425	0.0427875	-2.15089
Zm00001d005748	-2.4342	3.96262	27.3469	0.000534589	0.00336275	-2.15416
Zm00001d020457	-2.44169	4.23967	17.3117	0.00242158	0.0104581	-2.16079
Zm00001d051324	-2.45006	4.23364	24.3576	0.00079689	0.00454175	-2.16819
Zm00001d023529	-2.46362	3.70576	23.7728	0.000865368	0.00482751	-2.18019
Zm00001d025474	-2.48213	4.23467	30.4245	0.000366685	0.0025492	-2.19658
Zm00001d029432	-2.48667	3.35004	17.9873	0.00214905	0.0095459	-2.20059
Zm00001d007287	-2.49955	5.7005	28.5134	0.000461673	0.00301359	-2.21199
Zm00001d048162	-2.50249	3.73848	25.5858	0.000673424	0.00400739	-2.2146
Zm00001d040029	-2.50269	4.44893	31.139	0.000337416	0.00238946	-2.21477
Zm00001d027455	-2.52219	2.86091	9.94658	0.0116021	0.0343584	-2.23203
Zm00001d044365	-2.54124	4.05292	28.9696	0.000436495	0.00288582	-2.24888
Zm00001d043734	-2.5488	3.77744	22.9332	0.000976742	0.0052629	-2.25557
Zm00001d029922	-2.54884	3.40223	20.6666	0.00137805	0.0068259	-2.25561
Zm00001d004019	-2.55939	4.844	26.6131	0.000587719	0.00362324	-2.26495
Zm00001d029056	-2.56595	4.87341	23.9894	0.0008392	0.00472168	-2.27075
Zm00001d003088	-2.57228	4.2981	23.6536	0.000880199	0.00488215	-2.27635
Zm00001d018699	-2.58045	3.79007	21.7562	0.00116405	0.00601271	-2.28358
Zm00001d049870	-2.58658	3.79517	21.6547	0.00118217	0.00608201	-2.28901
Zm00001d016924	-2.60152	3.43146	12.9564	0.00571128	0.020043	-2.30223
Zm00001d043221	-2.6033	3.44809	20.6568	0.0013802	0.00683394	-2.3038
Zm00001d019925	-2.6133	2.95383	15.7923	0.00320682	0.0129217	-2.31266
Zm00001d036736	-2.62509	3.49663	9.56548	0.0128038	0.0370479	-2.32309
Zm00001d020620	-2.63022	5.19748	30.4274	0.000366558	0.0025492	-2.32763
Zm00001d003717	-2.63626	2.95642	11.1749	0.00856716	0.0272586	-2.33297
Zm00001d039394	-2.68841	6.23778	40.5675	0.000127391	0.00116233	-2.37912
Zm00001d001248	-2.7286	3.91556	8.7232	0.0160529	0.0440237	-2.41469
Zm00001d002160	-2.73457	5.66721	46.1071	7.83e-05	0.000814503	-2.41997
Zm00001d032636	-2.74038	3.91141	15.6381	0.00330287	0.0131946	-2.42511
Zm00001d047236	-2.75457	3.93761	22.5697	0.00103037	0.00547675	-2.43767
Zm00001d038408	-2.80611	2.25835	9.01955	0.014805	0.041423	-2.48328
Zm00001d049651	-2.86451	2.30631	9.04562	0.014701	0.0412057	-2.53497
Zm00001d037769	-2.87123	3.67459	24.0607	0.000830789	0.00468446	-2.54091
Zm00001d052063	-2.89597	2.33304	9.7889	0.0120817	0.035401	-2.5628
Zm00001d010945	-2.90067	5.13903	49.5199	5.94e-05	0.000656701	-2.56697
Zm00001d010287	-2.91565	4.3858	36.1662	0.000195567	0.00158619	-2.58022
Zm00001d053195	-2.99199	5.04189	44.2778	9.14e-05	0.000909139	-2.64778
Zm00001d020673	-2.99709	5.86226	38.201	0.000159597	0.00136969	-2.65229
Zm00001d002019	-2.99755	2.41781	10.6611	0.00970105	0.0299218	-2.6527
Zm00001d020528	-3.01271	3.27422	13.3649	0.00523051	0.0187596	-2.66612
Zm00001d012387	-3.0137	5.43385	19.5722	0.00164355	0.00777582	-2.66699
Zm00001d051938	-3.02545	5.23587	45.6097	8.16e-05	0.000839555	-2.67739
Zm00001d047883	-3.02685	3.31803	14.3247	0.00428256	0.0160698	-2.67863
Zm00001d047220	-3.03172	5.66108	53.3326	4.45e-05	0.000534026	-2.68294
Zm00001d010010	-3.04099	4.46666	32.3369	0.000294486	0.00215091	-2.69114
Zm00001d009118	-3.05108	3.81293	15.0267	0.00372036	0.0144222	-2.70007
Zm00001d038907	-3.05717	6.37622	67.4579	1.75e-05	0.000278348	-2.70546
Zm00001d029134	-3.05993	5.53866	48.1028	6.65e-05	0.000714327	-2.7079
Zm00001d026512	-3.07348	2.4808	11.3503	0.00821783	0.0263961	-2.71989
Zm00001d010499	-3.07351	4.21031	36.2277	0.000194343	0.00158052	-2.71992
Zm00001d002172	-3.08035	5.24791	19.0912	0.0017799	0.00827671	-2.72597
Zm00001d021690	-3.09269	4.49792	21.2043	0.00126692	0.00640434	-2.73689
Zm00001d000002	-3.1041	4.53486	48.7354	6.32e-05	0.00068817	-2.747
Zm00001d008872	-3.14714	3.40386	17.3712	0.00239595	0.0103779	-2.78508
Zm00001d032610	-3.19008	3.44058	27.422	0.000529485	0.00333816	-2.82308
Zm00001d009171	-3.19481	6.07497	26.7963	0.00057387	0.00355498	-2.82726
Zm00001d028339	-3.24043	4.91432	44.8546	8.7e-05	0.000877501	-2.86764
Zm00001d011563	-3.25972	2.63705	10.9535	0.00903465	0.0283268	-2.88471
Zm00001d022581	-3.26322	2.64045	14.0677	0.00451418	0.0167351	-2.8878
Zm00001d037608	-3.3018	4.39372	24.0709	0.000829599	0.00468181	-2.92195
Zm00001d035053	-3.31946	4.08752	17.9674	0.0021565	0.00957179	-2.93757
Zm00001d002952	-3.35468	4.45364	45.6881	8.1e-05	0.000835353	-2.96874
Zm00001d052375	-3.36998	3.59413	28.1736	0.000481579	0.00311216	-2.98228
Zm00001d050728	-3.38964	4.11878	40.5192	0.000127963	0.0011657	-2.99968
Zm00001d007189	-3.39507	2.75118	13.6391	0.00493552	0.0179284	-3.00449
Zm00001d039735	-3.41564	2.7685	13.1741	0.00544865	0.0193311	-3.02269
Zm00001d010653	-3.41611	6.09823	59.116	2.96e-05	0.00040122	-3.0231
Zm00001d037025	-3.42442	7.22497	59.4985	2.89e-05	0.00039448	-3.03046
Zm00001d019936	-3.47068	4.2038	12.9686	0.00569623	0.0200153	-3.0714
Zm00001d042256	-3.5406	2.87502	12.8735	0.00581545	0.0203247	-3.13327
Zm00001d051877	-3.58029	2.90837	17.849	0.00220163	0.00972687	-3.1684
Zm00001d048294	-3.5887	4.67241	55.593	3.78e-05	0.000478868	-3.17584
Zm00001d029581	-3.59051	3.76791	23.4524	0.000905943	0.00498534	-3.17744
Zm00001d021059	-3.63235	3.80399	26.38	0.000605938	0.00370958	-3.21447
Zm00001d024160	-3.71719	4.40358	53.4563	4.41e-05	0.000531806	-3.28955
Zm00001d011257	-3.73938	5.07924	56.8931	3.45e-05	0.000447973	-3.30919
Zm00001d047242	-3.80677	4.85068	61.2312	2.57e-05	0.000364331	-3.36882
Zm00001d046632	-3.95436	3.22703	21.0962	0.00128837	0.00648697	-3.49944
Zm00001d019256	-3.9642	4.09188	30.0469	0.000383404	0.00263176	-3.50814
Zm00001d039941	-3.97094	5.02566	55.7022	3.75e-05	0.000475639	-3.51411
Zm00001d009610	-4.03431	5.09689	25.1504	0.000714317	0.00418105	-3.57019
Zm00001d004620	-4.06611	4.7409	31.1238	0.00033801	0.00239279	-3.59833
Zm00001d004416	-4.0974	3.36664	24.6007	0.000770388	0.00442551	-3.62602
Zm00001d044124	-4.18995	5.19312	53.163	4.5e-05	0.000538753	-3.70792
Zm00001d046073	-4.36543	3.58097	31.998	0.000305916	0.00221694	-3.86321
Zm00001d009549	-4.37769	5.90958	78.4045	9.47e-06	0.000182723	-3.87406
Zm00001d043536	-4.49297	4.55682	45.9028	7.96e-05	0.000824863	-3.97608
Zm00001d006016	-4.79154	3.9677	30.6414	0.000357482	0.00249948	-4.2403
Zm00001d040048	-5.04789	5.58233	60.601	2.68e-05	0.000373593	-4.46716
Zm00001d027924	-6.72055	1.4163	8.99455	0.0169983	0.046007	-5.94739
Zm00001d002733	-6.83028	1.50579	10.1023	0.0129449	0.037322	-6.04449
Zm00001d027256	-6.89422	1.5577	9.60727	0.0145862	0.0409455	-6.10108
Zm00001d005284	-7.11962	1.74148	12.3889	0.00778632	0.0253387	-6.30055
Zm00001d027258	-7.15272	1.76885	12.3431	0.00786103	0.0255161	-6.32984
Zm00001d041154	-7.18638	1.79532	9.83373	0.0138047	0.0392047	-6.35962
Zm00001d012128	-7.22818	1.83205	12.3502	0.00784942	0.0254889	-6.39662
Zm00001d010380	-7.2283	1.83217	12.7261	0.00726223	0.0240636	-6.39673
Zm00001d016851	-7.23421	1.83634	9.41834	0.0152811	0.0424276	-6.40196
Zm00001d034783	-7.27487	1.87021	13.774	0.00589279	0.020529	-6.43794
Zm00001d028931	-7.33093	1.91525	11.3272	0.00977849	0.0301065	-6.48755
Zm00001d012285	-7.35679	1.93853	13.5364	0.00617278	0.0212771	-6.51043
Zm00001d026060	-7.51514	2.07051	16.1582	0.00380345	0.0146701	-6.65057
Zm00001d024762	-7.60408	2.14469	17.4971	0.00303355	0.0124011	-6.72928
Zm00001d021978	-7.67062	2.20048	17.634	0.00296633	0.0121836	-6.78816
Zm00001d005638	-7.70192	2.2276	16.1357	0.00381837	0.0147059	-6.81586
Zm00001d016076	-7.74345	2.26175	18.8845	0.00243086	0.0104827	-6.85261
Zm00001d018106	-7.74606	2.26491	13.6593	0.00602592	0.020872	-6.85492
Zm00001d004095	-7.84392	2.34661	19.1955	0.00231691	0.0101162	-6.94152
Zm00001d012392	-7.87073	2.36967	20.6473	0.00186547	0.00857779	-6.96525
Zm00001d043870	-8.02405	2.4993	21.7473	0.00159494	0.00761204	-7.10093
Zm00001d021900	-8.30766	2.74099	25.6314	0.000959022	0.00519366	-7.35191
Zm00001d037610	-8.4396	2.85447	29.4853	0.000612835	0.00373835	-7.46867
Zm00001d020100	-8.44646	2.86053	23.8873	0.00119552	0.00613293	-7.47474
Zm00001d015985	-8.60685	2.99833	26.3058	0.000883457	0.00489467	-7.61668
Zm00001d010690	-8.66314	3.04639	34.204	0.000376286	0.00259658	-7.6665
Zm00001d006193	-9.06059	3.39046	42.4497	0.000181077	0.00149817	-8.01822

## Sheet: Downregulated DEGs in mop1-1
FileS6.2: Genome-wide siRNA changes in mop1-1 mutant (pvalue < 0.05, FDR < 0.05). 200 out of 938 downregulated DEGs in mop1-1 mutant show depletion of 24-nt siRNAs.
Gene_id_v4	log2FC	log2CPM	F	PValue	FDR	Normalized logFC
Zm00001d003352	-0.949181	5.2093	8.43615	0.0173877	0.0468663	-0.839983
Zm00001d052906	-1.04104	4.74676	8.74692	0.0159484	0.0438491	-0.921277
Zm00001d052223	-1.11567	4.78782	10.3049	0.0105964	0.0320201	-0.987318
Zm00001d007290	-1.12575	4.04448	8.47812	0.0171842	0.0464439	-0.996241
Zm00001d010451	-1.20294	4.7354	11.399	0.008124	0.026157	-1.06455
Zm00001d010813	-1.22283	4.97307	10.5146	0.0100577	0.0307699	-1.08215
Zm00001d023117	-1.22568	4.45015	9.12711	0.0143818	0.0404559	-1.08468
Zm00001d038285	-1.26727	4.36487	11.8725	0.00727654	0.0240865	-1.12147
Zm00001d039770	-1.29395	3.92106	8.73544	0.0159989	0.0439371	-1.14509
Zm00001d027684	-1.32108	4.19909	10.3675	0.0104319	0.0316329	-1.1691
Zm00001d010078	-1.32769	5.09644	13.6967	0.00487621	0.0177591	-1.17495
Zm00001d053225	-1.32907	4.38391	8.63345	0.0164563	0.0448858	-1.17617
Zm00001d039946	-1.33084	4.7029	11.7597	0.00746815	0.024582	-1.17773
Zm00001d049096	-1.33649	4.40985	10.3405	0.0105026	0.0318003	-1.18273
Zm00001d002789	-1.35757	3.99455	10.92	0.00910805	0.0285038	-1.20139
Zm00001d026859	-1.36513	5.59986	16.1575	0.0029926	0.0122696	-1.20808
Zm00001d038718	-1.36856	6.18833	17.5067	0.00233878	0.010181	-1.21112
Zm00001d047096	-1.42226	4.27997	12.0636	0.00696554	0.0233274	-1.25864
Zm00001d036933	-1.42339	5.55119	13.1028	0.00553304	0.0195649	-1.25964
Zm00001d021667	-1.47045	5.6167	16.7896	0.00266166	0.011228	-1.30128
Zm00001d010697	-1.47753	4.98913	10.6679	0.00968489	0.0298808	-1.30755
Zm00001d047252	-1.50775	5.51602	18.0004	0.00214415	0.00952886	-1.3343
Zm00001d013979	-1.51632	4.93361	13.7666	0.00480529	0.0175612	-1.34188
Zm00001d030346	-1.54227	5.92826	21.2754	0.00125306	0.00635398	-1.36484
Zm00001d028950	-1.55111	4.2722	8.93729	0.015139	0.0421226	-1.37266
Zm00001d009612	-1.55259	4.67217	16.3115	0.00290753	0.0119975	-1.37397
Zm00001d003848	-1.57554	2.97146	8.23099	0.0184263	0.0490407	-1.39428
Zm00001d028796	-1.59671	3.89105	12.5997	0.00617615	0.021286	-1.41301
Zm00001d016408	-1.60309	4.81558	17.6152	0.00229421	0.0100429	-1.41866
Zm00001d027313	-1.61145	3.89087	12.2337	0.00670229	0.0226474	-1.42607
Zm00001d024717	-1.62128	4.04948	14.707	0.00396439	0.0151342	-1.43476
Zm00001d042723	-1.62685	4.054	12.9378	0.00573447	0.0201028	-1.43969
Zm00001d004650	-1.64737	4.76869	20.8586	0.00133705	0.0066752	-1.45785
Zm00001d009510	-1.66766	6.03964	22.8384	0.000990397	0.00531481	-1.47581
Zm00001d002026	-1.68607	4.2941	9.19719	0.014114	0.0398777	-1.49209
Zm00001d006045	-1.68909	4.1164	17.2905	0.0024308	0.0104827	-1.49477
Zm00001d024382	-1.70025	4.12552	17.1626	0.00248733	0.0106733	-1.50465
Zm00001d038068	-1.70644	4.63358	19.6621	0.00161951	0.00769194	-1.51013
Zm00001d004232	-1.71546	3.08554	9.87039	0.0118309	0.0348486	-1.5181
Zm00001d046642	-1.71814	3.59905	8.44973	0.0173215	0.0467363	-1.52048
Zm00001d052918	-1.721	4.78945	13.778	0.00479384	0.0175293	-1.52301
Zm00001d039638	-1.72161	3.62828	10.1652	0.0109753	0.0328931	-1.52355
Zm00001d032405	-1.72164	3.07575	9.03586	0.0147398	0.0412849	-1.52358
Zm00001d040188	-1.73288	4.53163	12.7936	0.00591792	0.0206	-1.53352
Zm00001d051389	-1.73994	4.89835	13.9871	0.00458993	0.0169479	-1.53977
Zm00001d040803	-1.77696	5.08266	14.5173	0.00411852	0.0155782	-1.57253
Zm00001d011392	-1.78751	3.14457	10.8968	0.00915944	0.0286263	-1.58186
Zm00001d037480	-1.78759	4.30913	14.1459	0.00444208	0.0165336	-1.58194
Zm00001d045661	-1.79005	2.7724	8.85222	0.0154943	0.0428955	-1.58412
Zm00001d015927	-1.79224	4.18913	18.1622	0.00208472	0.00934221	-1.58606
Zm00001d029580	-1.80078	3.42216	10.8903	0.0091737	0.0286594	-1.59361
Zm00001d022637	-1.80505	3.42567	10.3537	0.010468	0.0317127	-1.59739
Zm00001d004439	-1.81624	4.05826	17.7586	0.00223689	0.00985038	-1.6073
Zm00001d023872	-1.82424	4.23883	17.4622	0.00235735	0.0102492	-1.61437
Zm00001d034692	-1.85146	3.197	9.89848	0.0117459	0.034661	-1.63846
Zm00001d005939	-1.85154	2.82276	9.54199	0.0128828	0.0371994	-1.63853
Zm00001d037209	-1.86244	3.20605	12.1176	0.00688061	0.0230996	-1.64818
Zm00001d052827	-1.86652	4.87017	21.4281	0.00122391	0.00623852	-1.65179
Zm00001d005821	-1.87865	4.10962	19.6086	0.00163378	0.00774416	-1.66253
Zm00001d049583	-1.89676	3.73265	10.4266	0.0102796	0.031288	-1.67855
Zm00001d027589	-1.89883	3.50287	8.67903	0.0162499	0.0444486	-1.68038
Zm00001d025863	-1.94349	3.53972	12.999	0.00565876	0.0199123	-1.71991
Zm00001d052804	-1.95348	2.90667	10.3602	0.0104509	0.0316757	-1.72875
Zm00001d012707	-1.9614	2.91321	10.5641	0.00993526	0.0304812	-1.73575
Zm00001d002773	-1.96523	3.7892	11.7428	0.00749739	0.0246362	-1.73914
Zm00001d014492	-1.9843	3.29191	12.7113	0.00602582	0.020872	-1.75601
Zm00001d028793	-1.99605	3.30161	10.9165	0.00911576	0.0285217	-1.76642
Zm00001d038366	-2.02985	4.23474	23.8153	0.00086015	0.00480638	-1.79633
Zm00001d012231	-2.06261	3.88296	20.3335	0.00145291	0.00709873	-1.82532
Zm00001d051872	-2.08853	5.56809	31.3823	0.000328109	0.00234134	-1.84826
Zm00001d020736	-2.09678	4.75461	15.8818	0.00315259	0.0127587	-1.85555
Zm00001d032651	-2.11766	4.29576	20.934	0.00132136	0.00661118	-1.87404
Zm00001d053395	-2.12181	3.43482	13.1033	0.00553237	0.0195645	-1.8777
Zm00001d048256	-2.12911	2.55148	9.08888	0.0145304	0.0408154	-1.88417
Zm00001d033308	-2.13999	4.84756	24.6014	0.000770314	0.00442551	-1.89379
Zm00001d033347	-2.14426	3.42454	15.2471	0.00356282	0.013979	-1.89758
Zm00001d047512	-2.14992	3.42922	15.9088	0.00313648	0.0127182	-1.90259
Zm00001d039697	-2.18667	5.10706	29.1513	0.000426941	0.0028415	-1.93511
Zm00001d022496	-2.18781	4.37864	27.5325	0.000522092	0.00330273	-1.93612
Zm00001d007228	-2.18814	3.77011	17.6017	0.00229968	0.0100635	-1.93641
Zm00001d003125	-2.20743	4.80305	28.751	0.000448345	0.00294648	-1.95348
Zm00001d037974	-2.21328	3.79106	18.2058	0.00206905	0.00928792	-1.95866
Zm00001d048649	-2.21799	3.78131	20.7276	0.00136487	0.00677601	-1.96282
Zm00001d051130	-2.2182	4.40411	26.5282	0.000594279	0.00365077	-1.96301
Zm00001d008370	-2.23305	4.85801	26.5477	0.000592765	0.00364663	-1.97615
Zm00001d007992	-2.24222	4.70984	31.4394	0.000325971	0.00232779	-1.98426
Zm00001d026268	-2.2493	6.2629	25.0516	0.000724019	0.00422616	-1.99053
Zm00001d043271	-2.24943	3.5265	19.2005	0.00174773	0.00815234	-1.99065
Zm00001d000320	-2.28019	5.09047	37.264	0.000175056	0.00146414	-2.01787
Zm00001d045738	-2.28186	4.06594	24.3652	0.000796053	0.00453764	-2.01934
Zm00001d007351	-2.29855	3.1927	15.0394	0.00371105	0.0144003	-2.03411
Zm00001d044683	-2.29901	4.4843	24.9645	0.000732705	0.00426414	-2.03452
Zm00001d017495	-2.32006	3.59988	11.9422	0.00716126	0.0237934	-2.05315
Zm00001d003469	-2.32445	4.86854	16.5332	0.00279018	0.0116273	-2.05704
Zm00001d003114	-2.33792	4.30961	25.7426	0.000659395	0.0039455	-2.06895
Zm00001d018322	-2.39463	4.57732	21.7991	0.00115649	0.00598291	-2.11915
Zm00001d029318	-2.40153	4.35068	15.6546	0.00329246	0.0131613	-2.12525
Zm00001d044132	-2.42002	3.93724	10.8975	0.00915773	0.0286255	-2.14161
Zm00001d012274	-2.43667	4.40554	31.5349	0.000322428	0.00230796	-2.15634
Zm00001d028226	-2.45248	5.12313	38.2016	0.000159588	0.00136969	-2.17034
Zm00001d033466	-2.46464	3.70663	24.0443	0.000832714	0.00469352	-2.1811
Zm00001d014168	-2.47434	5.22424	24.334	0.000799528	0.00455268	-2.18968
Zm00001d023870	-2.52308	2.87848	15.3428	0.00349693	0.0137744	-2.23282
Zm00001d017333	-2.52503	5.74135	48.1996	6.59e-05	0.000710161	-2.23454
Zm00001d005905	-2.52537	5.51598	44.8492	8.7e-05	0.000877679	-2.23484
Zm00001d020977	-2.53871	4.82639	37.8398	0.00016535	0.00140397	-2.24665
Zm00001d020603	-2.55167	5.2083	39.9611	0.00013482	0.0012118	-2.25811
Zm00001d050768	-2.55168	4.9962	26.2849	0.00061357	0.0037405	-2.25812
Zm00001d010434	-2.57885	2.90836	10.6431	0.009744	0.0300167	-2.28217
Zm00001d039139	-2.59176	4.09573	30.2729	0.000373287	0.00258133	-2.29359
Zm00001d033284	-2.59212	2.93626	15.6075	0.00332238	0.0132577	-2.29391
Zm00001d015348	-2.61568	2.93938	11.1888	0.0085388	0.0271842	-2.31476
Zm00001d024166	-2.62625	4.38323	25.1781	0.000711631	0.00417394	-2.32412
Zm00001d034357	-2.646	4.93028	41.0687	0.000121624	0.00112577	-2.3416
Zm00001d002989	-2.66608	4.41713	30.837	0.000349426	0.00245672	-2.35937
Zm00001d049113	-2.67871	3.00881	16.7626	0.00267482	0.0112751	-2.37054
Zm00001d047090	-2.70854	3.0171	11.4427	0.00804098	0.0259386	-2.39694
Zm00001d046995	-2.73516	4.42403	15.6626	0.0032874	0.0131476	-2.4205
Zm00001d046923	-2.73588	3.55978	18.622	0.00192649	0.0087912	-2.42113
Zm00001d014971	-2.75499	2.21579	8.60953	0.0165658	0.0451079	-2.43804
Zm00001d048214	-2.7582	3.05915	12.2348	0.00670064	0.0226474	-2.44088
Zm00001d003676	-2.85242	3.17093	12.5186	0.0062883	0.0215783	-2.52427
Zm00001d040842	-2.88003	3.16179	13.1576	0.00546801	0.0193893	-2.5487
Zm00001d010755	-2.88104	3.16276	13.0835	0.00555608	0.0196286	-2.5496
Zm00001d003086	-2.88615	5.88448	52.9266	4.58e-05	0.000544748	-2.55412
Zm00001d046134	-2.88672	3.18372	18.493	0.00196934	0.00893491	-2.55462
Zm00001d041842	-2.89283	3.20521	9.05672	0.014657	0.041109	-2.56003
Zm00001d013295	-2.95635	3.74685	22.5353	0.00103564	0.00549803	-2.61624
Zm00001d030233	-2.95874	3.22822	13.6569	0.00491705	0.0178763	-2.61835
Zm00001d043325	-3.0473	5.11513	54.3384	4.13e-05	0.000508485	-2.69672
Zm00001d003281	-3.04962	4.4742	36.5391	0.000188287	0.0015441	-2.69878
Zm00001d021544	-3.08116	2.48837	8.58394	0.0166841	0.0453484	-2.72669
Zm00001d012096	-3.09673	3.88152	31.0893	0.000339358	0.00239895	-2.74047
Zm00001d002934	-3.09722	3.34565	16.1525	0.00299541	0.0122772	-2.7409
Zm00001d023887	-3.13723	2.53415	11.3817	0.00815721	0.0262401	-2.77631
Zm00001d021706	-3.20282	3.43571	17.5285	0.00232973	0.0101552	-2.83435
Zm00001d047207	-3.22302	3.97506	38.3413	0.000157428	0.00135852	-2.85223
Zm00001d009134	-3.2239	4.32611	22.9111	0.000979912	0.00527347	-2.85301
Zm00001d041544	-3.22569	3.47097	24.8347	0.000745883	0.00432091	-2.8546
Zm00001d001812	-3.22866	2.62994	12.3241	0.00656738	0.0222877	-2.85722
Zm00001d049081	-3.23906	5.57369	66.4043	1.86e-05	0.00029112	-2.86643
Zm00001d006446	-3.25443	4.69296	33.5664	0.00025716	0.00194128	-2.88002
Zm00001d025314	-3.29124	6.53086	44.5637	8.92e-05	0.000892761	-2.9126
Zm00001d034414	-3.32556	4.41436	24.0851	0.000827948	0.00467718	-2.94297
Zm00001d047168	-3.33665	4.42399	24.4423	0.000787533	0.00449957	-2.95279
Zm00001d012325	-3.399	5.43882	57.5655	3.29e-05	0.000433665	-3.00797
Zm00001d003245	-3.45826	2.82301	14.9258	0.00379537	0.0146433	-3.0604
Zm00001d003143	-3.48316	4.2144	42.8394	0.000103647	0.00100106	-3.08244
Zm00001d032973	-3.4865	3.67842	22.2965	0.00107306	0.00565755	-3.0854
Zm00001d005790	-3.54841	4.62298	49.0621	6.16e-05	0.000674514	-3.14019
Zm00001d050180	-3.56881	2.91606	16.0397	0.00305969	0.0124727	-3.15824
Zm00001d047186	-3.66911	4.36157	53.3736	4.43e-05	0.000533563	-3.247
Zm00001d016443	-3.71954	3.04409	16.2655	0.00293258	0.0120805	-3.29163
Zm00001d039713	-3.79458	3.09064	21.8416	0.00114905	0.00595153	-3.35803
Zm00001d035561	-3.80052	4.47661	57.1542	3.38e-05	0.000442136	-3.36329
Zm00001d032922	-3.81162	3.12235	19.9005	0.00155781	0.00747222	-3.37311
Zm00001d051362	-3.83469	3.12483	21.9878	0.00112394	0.00585275	-3.39353
Zm00001d025382	-3.94099	5.92896	74.2361	1.18e-05	0.000213538	-3.4876
Zm00001d013139	-4.04115	3.30164	25.4074	0.00068982	0.00408134	-3.57624
Zm00001d027330	-4.0728	3.34547	23.9336	0.000845843	0.00475153	-3.60425
Zm00001d006511	-4.09923	3.36854	13.6204	0.00495502	0.017988	-3.62764
Zm00001d032419	-4.13315	3.39753	17.119	0.00250697	0.0107293	-3.65766
Zm00001d013598	-4.16207	4.28011	56.7202	3.49e-05	0.000451	-3.68325
Zm00001d029263	-4.16712	5.20169	56.8336	3.46e-05	0.000449167	-3.68772
Zm00001d003378	-4.23777	3.48743	19.9962	0.00153385	0.00738809	-3.75024
Zm00001d026352	-4.25609	3.48668	25.3233	0.000697727	0.0041132	-3.76645
Zm00001d003725	-4.26179	3.50805	23.8525	0.000855629	0.00478707	-3.7715
Zm00001d017718	-4.58487	3.77178	12.5896	0.00618992	0.0213193	-4.05741
Zm00001d033319	-4.5936	5.18338	52.8584	4.6e-05	0.000546993	-4.06513
Zm00001d037494	-4.88115	4.03033	45.6133	8.16e-05	0.000839521	-4.3196
Zm00001d003155	-4.98047	4.11757	48.5161	6.43e-05	0.000696809	-4.4075
Zm00001d004387	-5.47871	4.5595	64.1329	2.14e-05	0.000318513	-4.84841
Zm00001d012719	-5.57439	4.66165	36.6602	0.000185992	0.00152849	-4.93309
Zm00001d016844	-5.87244	4.93039	69.2573	1.57e-05	0.000258165	-5.19685
Zm00001d046834	-5.89952	4.95481	50.9494	5.32e-05	0.000605558	-5.22082
Zm00001d025721	-6.81346	1.49197	9.72593	0.0141699	0.0400125	-6.02961
Zm00001d006910	-6.85451	1.52535	10.1298	0.0128606	0.0371682	-6.06594
Zm00001d039415	-6.88804	1.55128	9.16947	0.0162615	0.0444711	-6.09561
Zm00001d049851	-6.95655	1.60909	9.83192	0.0138107	0.0392189	-6.15624
Zm00001d051506	-7.07937	1.70861	10.8805	0.0108067	0.0325199	-6.26493
Zm00001d049220	-7.18425	1.79552	11.0875	0.0103142	0.0313731	-6.35774
Zm00001d053220	-7.30383	1.89484	12.9893	0.00688362	0.0231037	-6.46357
Zm00001d003196	-7.41491	1.98742	12.9148	0.00698826	0.0233835	-6.56187
Zm00001d030317	-7.45069	2.01567	9.49956	0.0149774	0.0417948	-6.59353
Zm00001d000360	-7.46719	2.03024	15.8478	0.00401577	0.0152931	-6.60813
Zm00001d005814	-7.48443	2.04403	15.3802	0.00436456	0.0163149	-6.62339
Zm00001d046330	-7.51958	2.07411	16.1431	0.00381343	0.0146983	-6.65449
Zm00001d029897	-7.54207	2.09264	16.1537	0.00380644	0.0146759	-6.6744
Zm00001d034416	-7.63368	2.17092	12.675	0.00733868	0.0242573	-6.75547
Zm00001d044538	-7.70001	2.22541	17.843	0.00286725	0.0118713	-6.81416
Zm00001d038699	-7.78125	2.29382	18.7697	0.00247466	0.0106271	-6.88606
Zm00001d045567	-7.79953	2.30938	20.0921	0.00202387	0.00913781	-6.90224
Zm00001d044420	-7.82995	2.33571	17.9335	0.00282564	0.0117338	-6.92916
Zm00001d006137	-8.16818	2.62233	25.2699	0.00100286	0.00536552	-7.22848
Zm00001d048055	-8.41366	2.83189	29.0233	0.000644972	0.00387696	-7.44572
Zm00001d047089	-8.82515	3.18593	18.3499	0.00264356	0.011177	-7.80987
Zm00001d029243	-9.09517	3.4203	19.111	0.00234718	0.0102119	-8.04882
Zm00001d017510	-9.28031	3.58253	13.3031	0.00646401	0.022021	-8.21266
Zm00001d052586	-9.54886	3.81733	52.8349	8.43e-05	0.000858634	-8.45032
Zm00001d003151	-9.59303	3.85628	60.4941	5.2e-05	0.000596363	-8.48941

## Sheet: zmb73v4_24-nt_siRNA_depletion
FileS6.3: Genome-wide siRNA changes in mop1-1 mutant 5' proximal promoter regions (pvalue < 0.05, FDR < 0.05). Out of 44,301 gene promoter regions, 7,844 genes show depletion in 24-nt siRNAs.
Gene_id_v4	log2FC	log2CPM	F	PValue	FDR	Normalized logFC
Zm00001d010570	-0.931184	5.55025	8.62793	0.0164815	0.044935	-0.824057
Zm00001d010572	-0.946122	5.4772	8.61548	0.0165385	0.0450527	-0.837276
Zm00001d003352	-0.949181	5.2093	8.43615	0.0173877	0.0468663	-0.839983
Zm00001d014628	-0.970297	4.74413	8.18406	0.0186745	0.0495396	-0.85867
Zm00001d027490	-0.981333	5.31462	8.79834	0.0157246	0.043394	-0.868436
Zm00001d019305	-0.982881	5.25578	8.14426	0.0188883	0.0499543	-0.869806
Zm00001d019306	-0.984471	5.25699	8.17475	0.0187242	0.0496277	-0.871214
Zm00001d000685	-0.986182	4.89279	8.35133	0.0178081	0.0477953	-0.872728
Zm00001d038597	-0.986968	5.54793	9.47589	0.0131082	0.0376849	-0.873423
Zm00001d033521	-0.997845	5.63847	9.52353	0.0129453	0.037322	-0.883049
Zm00001d012104	-0.999954	5.33543	9.60817	0.0126618	0.0367322	-0.884915
Zm00001d047136	-1.00001	4.99904	8.94174	0.0151207	0.0420837	-0.884968
Zm00001d013907	-1.00872	5.23411	8.61245	0.0165524	0.0450775	-0.892674
Zm00001d023934	-1.01247	5.58838	9.01026	0.0148422	0.0415094	-0.895995
Zm00001d029215	-1.01747	5.57715	10.043	0.0113204	0.0337052	-0.90042
Zm00001d043613	-1.02348	4.98171	8.77441	0.0158283	0.0436063	-0.905731
Zm00001d049153	-1.02488	5.0744	8.69042	0.0161988	0.0443368	-0.906976
Zm00001d033557	-1.02878	4.85473	9.09596	0.0145028	0.0407566	-0.910422
Zm00001d043993	-1.02956	5.80462	9.21863	0.0140333	0.039696	-0.911116
Zm00001d050359	-1.02957	4.60025	8.2154	0.0185083	0.0491787	-0.911121
Zm00001d002824	-1.03131	4.43995	8.22614	0.0184517	0.0490884	-0.912666
Zm00001d034413	-1.03423	5.43129	9.24638	0.0139298	0.039494	-0.915251
Zm00001d020697	-1.03977	4.86321	9.54221	0.012882	0.0371994	-0.920152
Zm00001d052906	-1.04104	4.74676	8.74692	0.0159484	0.0438491	-0.921277
Zm00001d032030	-1.04163	4.93543	8.75215	0.0159254	0.043803	-0.921795
Zm00001d022240	-1.04807	4.76059	8.64166	0.0164188	0.0448042	-0.927497
Zm00001d045944	-1.05402	4.92138	9.04252	0.0147133	0.0412314	-0.932757
Zm00001d021345	-1.05571	5.16689	9.39753	0.0133819	0.0382845	-0.934259
Zm00001d001866	-1.05914	5.13323	9.55786	0.0128294	0.0371054	-0.937292
Zm00001d006207	-1.06086	5.83639	8.26402	0.018254	0.0486881	-0.938814
Zm00001d025657	-1.06287	5.03981	8.88606	0.0153517	0.0425933	-0.940591
Zm00001d007210	-1.06642	4.55016	8.64777	0.016391	0.0447409	-0.943734
Zm00001d034638	-1.06865	4.77651	8.63309	0.0164579	0.0448858	-0.945704
Zm00001d004099	-1.07041	5.23177	8.74912	0.0159387	0.0438273	-0.947264
Zm00001d022367	-1.07411	4.82413	9.92874	0.0116552	0.0344634	-0.950541
Zm00001d050433	-1.07958	4.94114	9.50622	0.0130042	0.0374613	-0.955382
Zm00001d034809	-1.08049	4.7689	8.46648	0.0172404	0.0465525	-0.956187
Zm00001d025572	-1.08091	4.88697	9.44144	0.0132277	0.037946	-0.956558
Zm00001d011600	-1.08562	5.09152	8.28165	0.0181629	0.0485045	-0.960725
Zm00001d024179	-1.08836	4.23407	8.32323	0.0179501	0.0480707	-0.963147
Zm00001d037807	-1.09268	5.12666	10.1138	0.0111189	0.0332649	-0.966977
Zm00001d052084	-1.09285	4.88011	8.18024	0.0186949	0.0495701	-0.96712
Zm00001d004921	-1.09308	4.64952	9.44292	0.0132225	0.037934	-0.967329
Zm00001d046138	-1.09337	4.70729	9.56397	0.0128089	0.0370544	-0.967585
Zm00001d040372	-1.09354	4.40059	8.52078	0.0169804	0.0459712	-0.967735
Zm00001d033634	-1.09359	5.02042	9.37666	0.0134559	0.038444	-0.967783
Zm00001d009265	-1.09914	4.341	8.52302	0.0169698	0.045955	-0.972692
Zm00001d023316	-1.10356	5.29936	9.41537	0.013319	0.0381352	-0.976598
Zm00001d033561	-1.10519	4.48816	8.39401	0.017595	0.0473338	-0.978042
Zm00001d037141	-1.10885	4.5922	8.74159	0.0159718	0.0438967	-0.981279
Zm00001d026021	-1.11037	4.9098	10.6707	0.00967828	0.0298661	-0.982627
Zm00001d021260	-1.11075	4.90205	9.94733	0.0115999	0.0343545	-0.982968
Zm00001d009021	-1.11094	4.71236	9.22651	0.0140039	0.0396379	-0.983133
Zm00001d043675	-1.1136	4.77779	9.36657	0.0134919	0.0385253	-0.985482
Zm00001d052223	-1.11567	4.78782	10.3049	0.0105964	0.0320201	-0.987318
Zm00001d016771	-1.11647	4.2461	8.14726	0.0188721	0.0499248	-0.98803
Zm00001d040075	-1.11787	4.32645	8.3555	0.0177871	0.0477608	-0.989264
Zm00001d014872	-1.11841	5.64861	10.6869	0.00963979	0.0297802	-0.989748
Zm00001d046369	-1.1211	4.14397	8.47349	0.0172065	0.0464941	-0.99212
Zm00001d006170	-1.12131	5.90321	10.0849	0.0112006	0.0334401	-0.99231
Zm00001d011369	-1.12189	5.64528	10.9259	0.00909518	0.0284709	-0.99282
Zm00001d021829	-1.12409	4.60411	9.88906	0.0117743	0.0347291	-0.994767
Zm00001d020063	-1.12551	4.35186	8.96317	0.0150329	0.0419049	-0.996029
Zm00001d007290	-1.12575	4.04448	8.47812	0.0171842	0.0464439	-0.996241
Zm00001d025661	-1.12608	6.21482	11.8356	0.00733864	0.0242573	-0.996529
Zm00001d047857	-1.12752	6.03061	8.78097	0.0157997	0.0435501	-0.997801
Zm00001d042526	-1.12874	5.94785	8.37469	0.0176911	0.0475594	-0.998883
Zm00001d030129	-1.13214	4.24833	8.684	0.0162276	0.0443969	-1.0019
Zm00001d016054	-1.1322	4.74613	10.4584	0.0101986	0.0311086	-1.00195
Zm00001d038249	-1.13321	4.36768	8.77374	0.0158312	0.0436074	-1.00284
Zm00001d052736	-1.13328	4.59325	10.0057	0.0114285	0.0339662	-1.0029
Zm00001d033797	-1.13471	4.65555	8.92107	0.015206	0.0422699	-1.00417
Zm00001d021605	-1.13707	4.6662	9.78109	0.0121061	0.0354467	-1.00625
Zm00001d052085	-1.14009	4.37308	8.31729	0.0179803	0.0481288	-1.00893
Zm00001d052734	-1.1403	4.98035	10.223	0.0108166	0.0325372	-1.00912
Zm00001d018081	-1.14245	5.12418	9.33568	0.0136028	0.038772	-1.01102
Zm00001d020982	-1.14248	5.94712	11.4926	0.00794725	0.0257276	-1.01104
Zm00001d010371	-1.14296	4.53618	10.0746	0.0112297	0.0335119	-1.01147
Zm00001d051963	-1.14545	4.26878	9.57547	0.0127704	0.0369704	-1.01367
Zm00001d002097	-1.15018	4.51408	8.14742	0.0188712	0.0499248	-1.01786
Zm00001d003807	-1.15029	4.36159	9.65355	0.012513	0.0363948	-1.01795
Zm00001d019209	-1.15067	4.67682	9.61623	0.0126352	0.0366827	-1.01829
Zm00001d047465	-1.15097	4.83215	10.3843	0.0103884	0.0315353	-1.01856
Zm00001d019330	-1.15141	5.53914	9.80336	0.0120367	0.0353088	-1.01894
Zm00001d024126	-1.15171	5.92568	8.87669	0.015391	0.0426721	-1.01921
Zm00001d031844	-1.15238	5.05836	11.2166	0.0084825	0.027042	-1.0198
Zm00001d013386	-1.15487	4.54551	9.5058	0.0130056	0.0374613	-1.02201
Zm00001d003800	-1.15694	5.12028	11.426	0.0080726	0.0260172	-1.02384
Zm00001d017883	-1.15933	5.96617	12.1261	0.00686742	0.0230679	-1.02596
Zm00001d024734	-1.16004	4.76786	11.25	0.00841543	0.026872	-1.02658
Zm00001d008954	-1.16133	4.60616	9.26284	0.0138688	0.0393524	-1.02773
Zm00001d028661	-1.16479	4.07519	8.88217	0.015368	0.0426295	-1.03079
Zm00001d004472	-1.16483	4.07523	8.82366	0.0156158	0.0431639	-1.03082
Zm00001d010200	-1.16637	4.28528	8.70197	0.0161472	0.0442296	-1.03219
Zm00001d002304	-1.16664	4.40367	8.27469	0.0181988	0.0485806	-1.03243
Zm00001d006608	-1.16783	4.95453	11.0976	0.0087269	0.0275985	-1.03347
Zm00001d029041	-1.1706	4.28858	8.2416	0.0183707	0.0489227	-1.03593
Zm00001d015306	-1.17198	4.62351	9.44329	0.0132212	0.0379331	-1.03715
Zm00001d043513	-1.17385	4.65207	9.23457	0.0139738	0.0395842	-1.0388
Zm00001d038134	-1.17489	4.39063	8.9086	0.0152577	0.0423775	-1.03972
Zm00001d007069	-1.17582	5.50953	13.1127	0.00552122	0.0195355	-1.04055
Zm00001d048432	-1.17599	4.37203	9.22597	0.0140059	0.0396385	-1.0407
Zm00001d048084	-1.17655	4.60905	8.65	0.0163809	0.0447165	-1.04119
Zm00001d037941	-1.17711	5.43244	12.4676	0.00635994	0.0217669	-1.04169
Zm00001d008322	-1.17713	5.39162	12.6739	0.00607574	0.0210148	-1.04171
Zm00001d021775	-1.17783	4.08546	9.11577	0.0144257	0.0405706	-1.04233
Zm00001d003256	-1.17812	4.46677	9.01855	0.0148089	0.0414312	-1.04259
Zm00001d036708	-1.1782	4.70717	9.68372	0.0124152	0.0361642	-1.04266
Zm00001d030429	-1.17905	6.34298	11.8685	0.00728327	0.0241067	-1.04341
Zm00001d011373	-1.17905	4.92226	11.4507	0.00802585	0.0258974	-1.04341
Zm00001d008072	-1.17955	4.6906	9.62038	0.0126215	0.0366561	-1.04385
Zm00001d031811	-1.17982	4.82101	9.10657	0.0144614	0.0406507	-1.04409
Zm00001d024374	-1.17992	4.69089	9.55554	0.0128371	0.0371224	-1.04418
Zm00001d029314	-1.18369	4.37807	9.60612	0.0126686	0.036749	-1.04751
Zm00001d017192	-1.18372	3.85616	8.22752	0.0184445	0.0490791	-1.04754
Zm00001d046324	-1.1848	4.39844	9.26334	0.013867	0.03935	-1.0485
Zm00001d007923	-1.18549	5.43246	8.26749	0.018236	0.0486525	-1.0491
Zm00001d044021	-1.18559	4.68652	8.61672	0.0165328	0.045043	-1.04919
Zm00001d013264	-1.18649	5.2632	9.45302	0.0131874	0.0378693	-1.04999
Zm00001d042642	-1.18731	3.84764	8.57378	0.0167313	0.0454572	-1.05072
Zm00001d016389	-1.1875	5.12136	9.90799	0.0117173	0.0346021	-1.05089
Zm00001d025156	-1.18831	5.04147	12.5645	0.00622451	0.0214045	-1.0516
Zm00001d032111	-1.18905	4.64593	10.8635	0.00923352	0.0288163	-1.05226
Zm00001d045171	-1.19208	5.48286	8.58389	0.0166843	0.0453484	-1.05494
Zm00001d029211	-1.19282	4.57528	11.0925	0.00873767	0.0276147	-1.0556
Zm00001d010751	-1.19435	4.48903	10.6608	0.00970167	0.0299218	-1.05694
Zm00001d008883	-1.19436	5.44547	8.81205	0.0156656	0.0432678	-1.05695
Zm00001d026696	-1.19677	6.07348	10.2206	0.010823	0.0325494	-1.05909
Zm00001d036919	-1.19781	5.93661	9.78999	0.0120783	0.0353989	-1.06001
Zm00001d022530	-1.19792	4.50133	10.8996	0.00915313	0.0286157	-1.0601
Zm00001d019756	-1.19818	4.66213	10.2116	0.0108476	0.0326028	-1.06034
Zm00001d021088	-1.19856	3.85653	8.39428	0.0175937	0.0473338	-1.06067
Zm00001d010305	-1.20135	5.06557	8.49191	0.017118	0.0463021	-1.06314
Zm00001d046836	-1.20138	4.80023	12.0708	0.0069542	0.0232954	-1.06317
Zm00001d042347	-1.20221	3.85946	8.85323	0.01549	0.0428918	-1.0639
Zm00001d010451	-1.20294	4.7354	11.399	0.008124	0.026157	-1.06455
Zm00001d006491	-1.20335	3.98289	9.01568	0.0148204	0.0414604	-1.06491
Zm00001d043691	-1.20419	5.45353	12.9736	0.00568999	0.0200042	-1.06565
Zm00001d015485	-1.20762	4.49947	11.3747	0.00817066	0.026277	-1.06869
Zm00001d042023	-1.20815	4.78831	10.9875	0.00896078	0.028147	-1.06916
Zm00001d012910	-1.20901	4.32887	9.27424	0.0138267	0.0392587	-1.06992
Zm00001d002316	-1.20924	5.91592	14.0347	0.00454498	0.0168174	-1.07012
Zm00001d046916	-1.20982	5.66393	13.077	0.00556396	0.0196476	-1.07064
Zm00001d007077	-1.21111	4.12244	9.26621	0.0138563	0.0393228	-1.07178
Zm00001d052342	-1.21205	4.91512	10.2007	0.0108774	0.0326822	-1.07261
Zm00001d025926	-1.21286	5.12105	12.4575	0.0063744	0.0217973	-1.07333
Zm00001d033475	-1.21417	4.56429	9.44362	0.0132201	0.0379331	-1.07448
Zm00001d036000	-1.21417	4.49513	10.1387	0.0110489	0.0330858	-1.07448
Zm00001d052269	-1.21473	4.67514	11.5933	0.00776234	0.0252733	-1.07498
Zm00001d003554	-1.21659	3.87086	8.86904	0.0154232	0.0427492	-1.07663
Zm00001d024028	-1.21669	4.01539	8.32832	0.0179243	0.0480248	-1.07672
Zm00001d048570	-1.21763	4.95249	12.2654	0.00665458	0.0225358	-1.07755
Zm00001d012625	-1.21816	5.14068	11.1308	0.00865802	0.027466	-1.07802
Zm00001d015799	-1.21894	5.16113	12.3085	0.00659051	0.0223565	-1.07871
Zm00001d047466	-1.21911	4.82278	11.2222	0.00847126	0.0270194	-1.07886
Zm00001d024353	-1.21937	4.11835	9.70305	0.0123531	0.0360178	-1.07909
Zm00001d047535	-1.21991	5.46545	9.92898	0.0116545	0.0344634	-1.07957
Zm00001d012635	-1.22108	4.90391	10.6883	0.00963648	0.0297747	-1.0806
Zm00001d004992	-1.22179	4.14147	8.53939	0.0168924	0.0457995	-1.08123
Zm00001d010813	-1.22283	4.97307	10.5146	0.0100577	0.0307699	-1.08215
Zm00001d010279	-1.22287	4.41866	10.9648	0.00901007	0.0282724	-1.08218
Zm00001d032338	-1.22298	3.99844	8.96586	0.0150219	0.0418886	-1.08228
Zm00001d011507	-1.22357	5.43478	11.5696	0.0078054	0.0253812	-1.0828
Zm00001d026259	-1.22374	4.49319	9.86396	0.0118504	0.0348931	-1.08296
Zm00001d023117	-1.22568	4.45015	9.12711	0.0143818	0.0404559	-1.08468
Zm00001d030290	-1.22795	5.10188	10.33	0.0105302	0.0318569	-1.08668
Zm00001d012381	-1.22913	4.86808	9.41441	0.0133223	0.0381392	-1.08773
Zm00001d010678	-1.22918	4.73838	10.3101	0.0105826	0.0319857	-1.08777
Zm00001d025144	-1.23012	5.67116	10.6074	0.00982984	0.0302336	-1.0886
Zm00001d025261	-1.23061	4.00448	9.25665	0.0138917	0.039403	-1.08904
Zm00001d036429	-1.23077	4.58662	11.269	0.00837758	0.0267848	-1.08918
Zm00001d053964	-1.23202	5.65025	10.3307	0.0105283	0.0318536	-1.09028
Zm00001d029118	-1.23356	4.22232	9.1761	0.0141939	0.0400687	-1.09165
Zm00001d040285	-1.23379	4.02898	8.27969	0.018173	0.0485282	-1.09185
Zm00001d004555	-1.2371	4.51321	10.7912	0.00939728	0.0291854	-1.09478
Zm00001d027408	-1.23954	5.04299	11.5712	0.00780242	0.0253758	-1.09693
Zm00001d003322	-1.23962	4.52469	10.991	0.00895333	0.0281327	-1.09701
Zm00001d053028	-1.24013	5.67525	14.6057	0.0040458	0.0153743	-1.09746
Zm00001d025005	-1.24051	4.97048	13.0223	0.00563022	0.0198261	-1.0978
Zm00001d039465	-1.24126	3.74369	8.305	0.018043	0.0482493	-1.09846
Zm00001d031355	-1.24133	4.13572	10.4513	0.0102167	0.0311469	-1.09852
Zm00001d029402	-1.24186	5.37904	14.1529	0.00443567	0.016516	-1.09899
Zm00001d017158	-1.24229	4.66973	11.1569	0.00860413	0.0273521	-1.09937
Zm00001d023630	-1.24261	4.67902	11.1205	0.00867926	0.0275043	-1.09966
Zm00001d053181	-1.24282	4.82419	12.3219	0.00657066	0.0222969	-1.09984
Zm00001d002905	-1.24345	4.14803	9.90339	0.0117311	0.034633	-1.10039
Zm00001d051900	-1.24379	4.74105	9.94625	0.0116031	0.0343587	-1.1007
Zm00001d052172	-1.2443	4.95697	11.6927	0.00758498	0.0248634	-1.10115
Zm00001d049522	-1.24639	3.75954	8.6077	0.0165742	0.0451171	-1.103
Zm00001d051151	-1.24728	4.6089	11.8021	0.00739546	0.0244099	-1.10379
Zm00001d044201	-1.24759	3.61005	8.26021	0.0182738	0.0487077	-1.10406
Zm00001d007155	-1.24814	5.26553	10.6753	0.00966735	0.0298371	-1.10455
Zm00001d014227	-1.24825	4.01849	9.76798	0.0121472	0.0355528	-1.10465
Zm00001d000750	-1.24903	6.33973	9.7439	0.012223	0.0357374	-1.10534
Zm00001d006607	-1.2499	4.1319	9.7028	0.0123539	0.0360178	-1.10611
Zm00001d014013	-1.25012	5.21213	9.90746	0.0117189	0.0346021	-1.1063
Zm00001d016457	-1.25075	4.46996	9.63929	0.0125595	0.0365085	-1.10686
Zm00001d006336	-1.25466	4.76727	12.8987	0.00578351	0.0202438	-1.11031
Zm00001d032159	-1.25512	3.91281	9.4756	0.0131093	0.0376849	-1.11073
Zm00001d049816	-1.25555	3.92452	8.41932	0.0174701	0.0470399	-1.1111
Zm00001d024644	-1.25592	4.8036	9.0143	0.014826	0.041469	-1.11144
Zm00001d048662	-1.25685	4.86975	10.3367	0.0105125	0.0318278	-1.11226
Zm00001d004361	-1.25904	4.9085	12.9399	0.00573184	0.0200971	-1.11419
Zm00001d033021	-1.25967	4.82883	11.617	0.00771953	0.0251795	-1.11475
Zm00001d030838	-1.26046	3.91709	9.4508	0.0131951	0.0378887	-1.11545
Zm00001d051356	-1.26171	4.55166	11.8173	0.0073697	0.0243372	-1.11656
Zm00001d001896	-1.26175	4.87362	10.6206	0.00979805	0.0301501	-1.11659
Zm00001d016987	-1.26184	3.77185	9.2271	0.0140017	0.0396346	-1.11667
Zm00001d037584	-1.26271	4.52395	10.2236	0.0108148	0.032537	-1.11745
Zm00001d012027	-1.26285	4.01917	8.39428	0.0175937	0.0473338	-1.11757
Zm00001d045740	-1.26289	3.77268	9.34443	0.0135713	0.0386906	-1.1176
Zm00001d028722	-1.26294	4.05209	8.58066	0.0166993	0.0453829	-1.11764
Zm00001d033499	-1.26305	3.90777	8.84884	0.0155086	0.0429189	-1.11775
Zm00001d051572	-1.26382	4.25656	11.1474	0.00862373	0.0273953	-1.11843
Zm00001d049905	-1.2639	4.35219	11.1095	0.00870218	0.0275416	-1.11849
Zm00001d034965	-1.26569	3.90991	9.79256	0.0120703	0.0353808	-1.12008
Zm00001d025990	-1.26687	5.27747	13.7662	0.00480571	0.0175612	-1.12112
Zm00001d009724	-1.26717	3.91106	9.32712	0.0136337	0.0388149	-1.12139
Zm00001d038285	-1.26727	4.36487	11.8725	0.00727654	0.0240865	-1.12147
Zm00001d053172	-1.26975	4.26124	10.0867	0.0111953	0.0334296	-1.12367
Zm00001d029300	-1.2699	3.77828	8.67233	0.01628	0.0445069	-1.12381
Zm00001d006899	-1.27016	3.77852	8.73864	0.0159848	0.0439231	-1.12404
Zm00001d002420	-1.27126	7.12265	11.9588	0.00713404	0.0237341	-1.12501
Zm00001d023499	-1.27128	5.48577	13.9873	0.00458967	0.0169479	-1.12503
Zm00001d005158	-1.27143	5.19807	9.4986	0.0130302	0.0375127	-1.12516
Zm00001d002408	-1.27166	5.57799	14.6484	0.00401124	0.0152803	-1.12536
Zm00001d002419	-1.27207	7.12329	11.9813	0.00709752	0.0236472	-1.12573
Zm00001d004524	-1.27253	3.61777	8.15484	0.0188312	0.0498436	-1.12614
Zm00001d027811	-1.27428	3.92807	8.8762	0.0153931	0.0426748	-1.12768
Zm00001d049457	-1.27479	5.44736	12.2128	0.00673408	0.0227293	-1.12813
Zm00001d018406	-1.27555	4.68693	8.76013	0.0158905	0.0437254	-1.1288
Zm00001d012041	-1.27639	5.42785	11.6673	0.0076299	0.0249745	-1.12955
Zm00001d034966	-1.27699	3.91891	9.96687	0.0115421	0.03423	-1.13008
Zm00001d009359	-1.28044	4.87975	12.3575	0.00651841	0.0221658	-1.13313
Zm00001d035568	-1.28052	3.93309	9.07439	0.0145873	0.0409457	-1.1332
Zm00001d004885	-1.2806	3.63638	8.26857	0.0182304	0.0486451	-1.13328
Zm00001d022778	-1.28076	4.73628	8.46396	0.0172526	0.0465759	-1.13342
Zm00001d053695	-1.28119	6.07122	13.1909	0.00542899	0.0192864	-1.1338
Zm00001d036022	-1.28339	3.91266	8.89449	0.0153164	0.0425166	-1.13574
Zm00001d052888	-1.28444	4.03633	8.84313	0.0155328	0.0429709	-1.13667
Zm00001d053171	-1.28516	4.27346	10.258	0.0107219	0.0323167	-1.13731
Zm00001d046116	-1.28813	4.90611	10.8773	0.00920271	0.0287304	-1.13994
Zm00001d012634	-1.28844	4.64143	12.9389	0.00573315	0.0200999	-1.14021
Zm00001d006157	-1.28854	3.64275	8.78539	0.0157806	0.0435117	-1.1403
Zm00001d018291	-1.29111	4.76259	8.78651	0.0157757	0.043504	-1.14257
Zm00001d028332	-1.29196	5.68476	10.3632	0.0104431	0.0316643	-1.14333
Zm00001d018263	-1.29208	5.39736	11.7223	0.00753313	0.0247204	-1.14343
Zm00001d001737	-1.29216	4.1654	8.35534	0.0177879	0.0477608	-1.1435
Zm00001d011642	-1.29242	4.05357	9.22866	0.0139958	0.0396237	-1.14374
Zm00001d013899	-1.29331	5.10022	12.7183	0.00601666	0.0208549	-1.14453
Zm00001d039770	-1.29395	3.92106	8.73544	0.0159989	0.0439371	-1.14509
Zm00001d051810	-1.29431	5.09425	10.6849	0.00964446	0.0297899	-1.14541
Zm00001d035041	-1.29475	5.57756	13.8563	0.00471617	0.0173068	-1.1458
Zm00001d039219	-1.2952	4.39705	11.7958	0.00740617	0.024439	-1.1462
Zm00001d023393	-1.29941	5.11299	13.0624	0.00558148	0.0197006	-1.14992
Zm00001d014035	-1.29953	4.64093	12.407	0.00644652	0.0219767	-1.15002
Zm00001d005295	-1.30006	4.19297	10.6367	0.00975937	0.0300547	-1.1505
Zm00001d032810	-1.30051	3.93763	10.3956	0.010359	0.0314753	-1.15089
Zm00001d006337	-1.30066	4.16161	8.73464	0.0160024	0.0439376	-1.15102
Zm00001d053168	-1.30069	5.16147	10.827	0.00931589	0.0289878	-1.15106
Zm00001d049693	-1.3009	4.4016	11.7987	0.00740128	0.024425	-1.15124
Zm00001d050316	-1.30097	4.87007	13.8262	0.00474587	0.0173911	-1.1513
Zm00001d048707	-1.30146	4.06082	10.5824	0.00989054	0.0303845	-1.15173
Zm00001d024025	-1.3017	3.64108	8.6447	0.016405	0.0447728	-1.15195
Zm00001d045320	-1.30228	4.97788	10.8582	0.00924554	0.0288171	-1.15246
Zm00001d052979	-1.30284	3.80457	9.82288	0.0119763	0.0351685	-1.15296
Zm00001d028631	-1.30405	3.94049	8.77038	0.0158458	0.043627	-1.15402
Zm00001d011755	-1.30494	4.17559	10.2662	0.0106999	0.0322655	-1.15481
Zm00001d050404	-1.30608	4.57729	12.4055	0.00644875	0.0219786	-1.15583
Zm00001d045044	-1.30638	4.9262	8.30273	0.0180546	0.0482682	-1.15609
Zm00001d006484	-1.30665	3.79584	9.04336	0.01471	0.041225	-1.15632
Zm00001d041548	-1.3068	4.20896	9.96436	0.0115495	0.0342493	-1.15646
Zm00001d028899	-1.30764	3.94331	8.65685	0.0163499	0.0446535	-1.1572
Zm00001d001528	-1.30811	3.47578	8.24484	0.0183538	0.0488844	-1.15762
Zm00001d025055	-1.30944	5.21707	12.231	0.00670638	0.0226573	-1.1588
Zm00001d040593	-1.30975	4.36854	8.46163	0.0172638	0.0465999	-1.15907
Zm00001d007938	-1.31063	4.59041	11.1176	0.00868522	0.0275043	-1.15985
Zm00001d027864	-1.31277	4.6607	9.6581	0.0124982	0.0363625	-1.16174
Zm00001d006417	-1.31309	4.07007	10.7486	0.00949552	0.0294251	-1.16203
Zm00001d033239	-1.31349	4.08132	10.3678	0.0104311	0.0316328	-1.16238
Zm00001d010407	-1.31408	4.60268	11.0498	0.00882766	0.0278204	-1.1629
Zm00001d005309	-1.31419	3.65102	8.90951	0.0152539	0.042373	-1.163
Zm00001d033858	-1.31449	4.92693	10.6575	0.00970946	0.0299411	-1.16327
Zm00001d004777	-1.31492	4.92725	9.92706	0.0116602	0.034473	-1.16364
Zm00001d011386	-1.31641	3.81539	10.199	0.0108822	0.0326916	-1.16496
Zm00001d015772	-1.31698	4.28847	10.4089	0.0103248	0.0313899	-1.16547
Zm00001d040692	-1.31727	4.28871	9.38603	0.0134226	0.0383758	-1.16572
Zm00001d030269	-1.31743	4.39468	11.0649	0.00879571	0.02776	-1.16587
Zm00001d002095	-1.31795	3.65404	9.15958	0.014257	0.040206	-1.16632
Zm00001d019089	-1.31869	3.65464	8.9298	0.0151698	0.0421905	-1.16698
Zm00001d002756	-1.31939	4.73973	11.823	0.00735999	0.024314	-1.1676
Zm00001d030661	-1.31946	4.39626	11.0918	0.00873909	0.027617	-1.16766
Zm00001d035948	-1.31953	4.32145	10.6995	0.00961006	0.0297095	-1.16772
Zm00001d046755	-1.32033	4.65743	12.7978	0.00591249	0.0205848	-1.16844
Zm00001d005313	-1.32083	3.48601	8.1554	0.0188281	0.0498389	-1.16888
Zm00001d019331	-1.32091	4.57004	9.4594	0.0131653	0.0378226	-1.16894
Zm00001d027684	-1.32108	4.19909	10.3675	0.0104319	0.0316329	-1.1691
Zm00001d030624	-1.32109	4.80211	12.0156	0.00704208	0.0235233	-1.16911
Zm00001d004875	-1.32116	6.03764	16.2413	0.0029459	0.0121289	-1.16917
Zm00001d018178	-1.32178	4.46773	8.21229	0.0185247	0.0492189	-1.16972
Zm00001d032695	-1.32269	3.65789	8.45467	0.0172976	0.0466877	-1.17052
Zm00001d010253	-1.32319	3.65824	9.02016	0.0148025	0.0414191	-1.17097
Zm00001d015706	-1.32375	4.51809	12.3204	0.00657287	0.0223006	-1.17146
Zm00001d049513	-1.32485	6.08973	16.1309	0.00300757	0.0123206	-1.17243
Zm00001d004773	-1.32589	4.19228	10.6698	0.00968023	0.0298698	-1.17336
Zm00001d047677	-1.32609	3.95804	10.7553	0.00947986	0.0293836	-1.17353
Zm00001d000175	-1.32628	4.65287	10.7387	0.00951834	0.0294818	-1.1737
Zm00001d010078	-1.32769	5.09644	13.6967	0.00487621	0.0177591	-1.17495
Zm00001d053225	-1.32907	4.38391	8.63345	0.0164563	0.0448858	-1.17617
Zm00001d038844	-1.32938	4.08307	10.7649	0.00945773	0.0293306	-1.17644
Zm00001d013459	-1.32979	4.90156	13.5802	0.00499714	0.0181052	-1.17681
Zm00001d045556	-1.33044	3.66404	9.3073	0.0137057	0.0389744	-1.17738
Zm00001d039946	-1.33084	4.7029	11.7597	0.00746815	0.024582	-1.17773
Zm00001d028601	-1.3331	4.09703	11.0176	0.00889624	0.0279803	-1.17974
Zm00001d038913	-1.33314	5.47252	10.0083	0.0114209	0.0339529	-1.17977
Zm00001d002833	-1.33381	5.36233	16.4438	0.00283677	0.0117688	-1.18036
Zm00001d002338	-1.33383	3.49644	8.86554	0.015438	0.0427811	-1.18038
Zm00001d014839	-1.33389	6.26567	15.7868	0.00321018	0.0129299	-1.18044
Zm00001d053561	-1.33403	3.81776	9.70462	0.0123481	0.0360115	-1.18055
Zm00001d039954	-1.3343	5.18019	12.4151	0.006435	0.0219489	-1.1808
Zm00001d029872	-1.33471	4.47801	8.36413	0.0177438	0.0476752	-1.18116
Zm00001d025028	-1.33567	4.66033	11.3473	0.00822374	0.0264102	-1.18201
Zm00001d049096	-1.33649	4.40985	10.3405	0.0105026	0.0318003	-1.18273
Zm00001d030197	-1.33772	4.44092	8.77348	0.0158323	0.0436074	-1.18382
Zm00001d018377	-1.34017	5.12253	12.6528	0.00610411	0.0210775	-1.18599
Zm00001d016234	-1.34142	3.83536	9.72676	0.0122774	0.0358589	-1.1871
Zm00001d002819	-1.3417	3.98187	10.9408	0.00906245	0.0283912	-1.18734
Zm00001d025469	-1.3436	5.56936	13.3359	0.00526298	0.0188381	-1.18903
Zm00001d039021	-1.34434	4.54425	10.2698	0.0106901	0.0322449	-1.18968
Zm00001d049867	-1.34448	4.11701	9.54883	0.0128597	0.0371682	-1.1898
Zm00001d011544	-1.34541	5.90258	16.6726	0.00271939	0.0114138	-1.19063
Zm00001d024175	-1.34561	5.7832	14.5634	0.0040804	0.0154739	-1.19081
Zm00001d042683	-1.34649	5.18196	14.2306	0.00436566	0.0163174	-1.19158
Zm00001d039176	-1.34679	4.44814	11.2949	0.00832624	0.0266655	-1.19185
Zm00001d009653	-1.34815	5.54642	15.6166	0.00331656	0.0132385	-1.19306
Zm00001d026586	-1.34852	4.67983	10.6962	0.00961778	0.029731	-1.19338
Zm00001d006409	-1.34863	5.92653	8.67222	0.0162805	0.0445069	-1.19348
Zm00001d015824	-1.34877	3.82957	8.4662	0.0172417	0.046553	-1.1936
Zm00001d045305	-1.34939	5.79237	13.1844	0.00543657	0.0193005	-1.19415
Zm00001d001401	-1.34975	5.14484	12.801	0.0059084	0.0205742	-1.19447
Zm00001d017114	-1.35055	4.11094	11.6666	0.00763099	0.0249745	-1.19517
Zm00001d046968	-1.35117	4.44157	9.78186	0.0121037	0.0354441	-1.19573
Zm00001d051956	-1.35156	4.51091	11.981	0.0070979	0.0236472	-1.19607
Zm00001d008431	-1.35239	3.83249	8.92344	0.0151961	0.0422515	-1.1968
Zm00001d050518	-1.35296	4.12385	9.42032	0.0133016	0.0381021	-1.19731
Zm00001d030143	-1.35324	3.68234	8.58303	0.0166883	0.0453561	-1.19756
Zm00001d028154	-1.35376	4.12448	10.7425	0.00950951	0.0294573	-1.19801
Zm00001d032177	-1.35411	3.85728	9.22481	0.0140102	0.0396473	-1.19833
Zm00001d039845	-1.35725	5.07937	10.9006	0.00915098	0.0286112	-1.2011
Zm00001d002789	-1.35757	3.99455	10.92	0.00910805	0.0285038	-1.20139
Zm00001d043277	-1.35762	3.84842	9.624	0.0126097	0.0366351	-1.20143
Zm00001d045000	-1.35878	5.34273	15.0408	0.00371007	0.0144003	-1.20246
Zm00001d019917	-1.35963	4.2298	10.3686	0.010429	0.031629	-1.20321
Zm00001d033662	-1.3601	4.61071	13.9365	0.00463828	0.0170899	-1.20363
Zm00001d008090	-1.36035	5.02386	11.729	0.00752151	0.0246885	-1.20385
Zm00001d004742	-1.36079	4.52803	12.5882	0.00619193	0.0213243	-1.20424
Zm00001d009673	-1.36371	5.38603	16.8982	0.00260941	0.0110613	-1.20682
Zm00001d040570	-1.36378	5.0266	12.0276	0.00702295	0.023474	-1.20689
Zm00001d004435	-1.36493	4.50205	8.17684	0.0187131	0.0496083	-1.2079
Zm00001d041216	-1.36503	4.81226	11.6705	0.00762409	0.0249665	-1.20799
Zm00001d026859	-1.36513	5.59986	16.1575	0.0029926	0.0122696	-1.20808
Zm00001d003446	-1.36535	4.14471	8.55041	0.0168406	0.0456907	-1.20827
Zm00001d026669	-1.36547	5.31065	12.8698	0.00582015	0.0203365	-1.20838
Zm00001d025128	-1.36591	5.44749	16.6545	0.00272847	0.0114408	-1.20877
Zm00001d009961	-1.36614	3.70491	9.37895	0.0134477	0.0384308	-1.20897
Zm00001d001257	-1.36619	3.97887	8.57787	0.0167123	0.0454086	-1.20902
Zm00001d043782	-1.36672	4.63503	14.1166	0.00446893	0.0166051	-1.20948
Zm00001d049694	-1.36696	4.12409	9.96843	0.0115375	0.0342242	-1.2097
Zm00001d000181	-1.36805	5.37482	15.791	0.00320764	0.0129237	-1.21066
Zm00001d038718	-1.36856	6.18833	17.5067	0.00233878	0.010181	-1.21112
Zm00001d013906	-1.3694	4.43606	8.784	0.0157866	0.0435216	-1.21186
Zm00001d018159	-1.36974	4.85844	14.7284	0.00394746	0.0150858	-1.21216
Zm00001d016511	-1.3708	5.36719	14.743	0.00393599	0.015053	-1.2131
Zm00001d037542	-1.37153	3.5267	9.21194	0.0140585	0.039758	-1.21374
Zm00001d014906	-1.37188	3.70952	10.0684	0.0112475	0.0335496	-1.21405
Zm00001d045270	-1.37254	4.35338	12.3593	0.00651574	0.0221596	-1.21464
Zm00001d050032	-1.37273	3.99534	11.0373	0.00885409	0.0278925	-1.2148
Zm00001d029133	-1.37332	5.29815	11.1306	0.00865832	0.027466	-1.21532
Zm00001d001547	-1.37349	4.64043	11.5869	0.00777385	0.0253066	-1.21548
Zm00001d037272	-1.37431	4.41993	8.19836	0.0185984	0.0493913	-1.21621
Zm00001d015142	-1.37475	3.52931	9.52953	0.0129249	0.0372853	-1.21659
Zm00001d039594	-1.37581	3.71271	8.76461	0.0158709	0.0436839	-1.21753
Zm00001d042054	-1.37644	4.38754	8.8621	0.0154525	0.0428032	-1.21809
Zm00001d004915	-1.37646	4.66188	11.3631	0.008193	0.0263293	-1.21811
Zm00001d025103	-1.37686	4.35684	12.0036	0.00706142	0.0235614	-1.21846
Zm00001d045047	-1.37709	4.70257	12.3384	0.00654633	0.0222375	-1.21866
Zm00001d051302	-1.37834	3.53216	9.15401	0.0142782	0.0402573	-1.21977
Zm00001d033307	-1.37839	4.14418	11.1169	0.00868672	0.0275048	-1.21982
Zm00001d033586	-1.37957	4.32807	8.7809	0.0158001	0.0435501	-1.22086
Zm00001d039645	-1.3798	3.71591	9.36637	0.0134926	0.0385253	-1.22107
Zm00001d006057	-1.3812	4.14643	11.5343	0.00787001	0.0255332	-1.2223
Zm00001d051550	-1.38135	4.90791	11.1025	0.00871678	0.0275754	-1.22243
Zm00001d022789	-1.38172	3.53494	9.31257	0.0136865	0.038934	-1.22276
Zm00001d002025	-1.38313	4.96994	12.6341	0.00612936	0.0211535	-1.22401
Zm00001d036103	-1.38331	4.23813	11.6595	0.00764372	0.0249973	-1.22417
Zm00001d020297	-1.38371	4.2597	12.551	0.00624316	0.0214535	-1.22452
Zm00001d040326	-1.38433	4.36281	13.4462	0.00514081	0.018513	-1.22507
Zm00001d023433	-1.38435	4.46807	11.5248	0.00788748	0.0255722	-1.22508
Zm00001d012656	-1.38437	3.85807	9.73523	0.0122505	0.0357933	-1.22511
Zm00001d048661	-1.38483	4.46846	13.1223	0.00550976	0.0195055	-1.22551
Zm00001d015148	-1.38535	5.11001	11.1414	0.00863606	0.0274243	-1.22597
Zm00001d006621	-1.3856	4.76519	9.96727	0.0115409	0.0342291	-1.2262
Zm00001d052594	-1.38687	4.36485	13.3133	0.00528841	0.0189014	-1.22732
Zm00001d014024	-1.38704	3.72171	9.93598	0.0116336	0.0344257	-1.22747
Zm00001d032042	-1.38804	5.43635	12.3626	0.00651103	0.0221464	-1.22836
Zm00001d046471	-1.3889	3.34498	8.34356	0.0178472	0.0478642	-1.22912
Zm00001d003808	-1.38892	3.88521	10.0542	0.0112883	0.0336328	-1.22913
Zm00001d017448	-1.38921	4.01988	11.1499	0.00861843	0.0273883	-1.22939
Zm00001d012434	-1.38929	3.86205	10.5817	0.00989222	0.0303873	-1.22946
Zm00001d041949	-1.39001	6.36684	18.0829	0.00211356	0.00943688	-1.2301
Zm00001d000006	-1.39019	5.37038	11.301	0.00831429	0.0266444	-1.23025
Zm00001d020764	-1.39022	4.24365	11.2243	0.00846703	0.0270125	-1.23028
Zm00001d041922	-1.3903	3.55455	8.81965	0.015633	0.0431991	-1.23036
Zm00001d006438	-1.39046	3.73663	8.85738	0.0154724	0.0428523	-1.2305
Zm00001d042983	-1.3905	5.39267	16.0582	0.00304903	0.0124462	-1.23053
Zm00001d028721	-1.39154	4.02176	10.422	0.0102912	0.0313179	-1.23145
Zm00001d026154	-1.39205	4.23451	9.16099	0.0142515	0.0401936	-1.2319
Zm00001d044288	-1.39234	4.33828	9.37434	0.0134642	0.0384525	-1.23216
Zm00001d023643	-1.3932	4.34927	12.16	0.00681488	0.0229406	-1.23292
Zm00001d020315	-1.39333	4.9216	9.86176	0.0118571	0.0349063	-1.23304
Zm00001d005216	-1.39369	4.25706	12.7565	0.00596624	0.0207387	-1.23336
Zm00001d023841	-1.39411	4.35	12.1051	0.00690022	0.0231522	-1.23372
Zm00001d030034	-1.39434	4.5548	11.1068	0.00870779	0.0275537	-1.23393
Zm00001d048385	-1.39509	4.809	12.1309	0.00685991	0.0230525	-1.23459
Zm00001d016025	-1.39509	4.37141	12.465	0.00636372	0.0217769	-1.2346
Zm00001d051588	-1.39513	4.99947	12.5097	0.00630063	0.0216092	-1.23463
Zm00001d020448	-1.39538	4.62933	13.1236	0.00550828	0.019502	-1.23485
Zm00001d007016	-1.39597	4.5561	14.1393	0.0044481	0.0165465	-1.23537
Zm00001d034278	-1.39598	3.55912	8.99743	0.0148939	0.0416063	-1.23538
Zm00001d023432	-1.39625	4.47759	11.687	0.00759509	0.0248924	-1.23562
Zm00001d014196	-1.39744	4.02648	11.6638	0.00763612	0.0249829	-1.23667
Zm00001d011455	-1.39774	5.275	15.6193	0.00331485	0.013233	-1.23694
Zm00001d046336	-1.39786	4.79308	13.3674	0.00522773	0.0187531	-1.23705
Zm00001d007976	-1.39833	5.04573	9.61311	0.0126455	0.0367039	-1.23746
Zm00001d041402	-1.39839	4.81166	15.8208	0.00318943	0.0128742	-1.23752
Zm00001d051540	-1.39882	4.88169	8.17502	0.0187228	0.0496274	-1.23789
Zm00001d028749	-1.39931	4.11713	8.29913	0.018073	0.0483108	-1.23833
Zm00001d031014	-1.39984	4.16136	12.1066	0.00689785	0.0231482	-1.2388
Zm00001d038287	-1.40002	3.56237	8.68355	0.0162296	0.0443993	-1.23895
Zm00001d038411	-1.40106	4.16232	12.145	0.0068381	0.023001	-1.23988
Zm00001d010504	-1.40112	5.88518	14.5352	0.00410371	0.0155417	-1.23993
Zm00001d008923	-1.40112	4.02948	11.0398	0.00884888	0.0278806	-1.23993
Zm00001d024540	-1.40134	4.61506	8.95164	0.0150801	0.0419945	-1.24012
Zm00001d051732	-1.40169	5.32082	15.7144	0.00325491	0.0130563	-1.24043
Zm00001d024693	-1.4027	3.88454	11.7132	0.00754907	0.0247602	-1.24132
Zm00001d012359	-1.40283	5.22684	14.0051	0.00457281	0.0168964	-1.24144
Zm00001d043986	-1.40284	4.82431	9.57227	0.0127811	0.0369932	-1.24145
Zm00001d010086	-1.40358	3.34346	8.18135	0.018689	0.0495645	-1.24211
Zm00001d000522	-1.404	4.63621	13.3376	0.00526112	0.0188332	-1.24248
Zm00001d030998	-1.40483	5.14157	16.7485	0.00268174	0.0112994	-1.24322
Zm00001d034370	-1.40524	5.47879	17.4197	0.00237529	0.0103124	-1.24358
Zm00001d033860	-1.40546	4.58326	13.303	0.00530014	0.0189313	-1.24377
Zm00001d024055	-1.4063	4.26718	11.7674	0.00745503	0.0245628	-1.24451
Zm00001d037739	-1.40687	3.89963	10.3821	0.0103941	0.0315476	-1.24502
Zm00001d048457	-1.40735	3.88825	10.6043	0.00983745	0.0302547	-1.24545
Zm00001d047803	-1.40738	4.16742	10.6786	0.00965935	0.0298195	-1.24547
Zm00001d008250	-1.40749	4.96343	14.4434	0.0041805	0.0157596	-1.24557
Zm00001d026273	-1.40776	4.1239	8.31874	0.0179729	0.0481185	-1.24581
Zm00001d014565	-1.4081	4.39217	13.252	0.00535825	0.0190883	-1.24611
Zm00001d039642	-1.40932	3.36144	8.48584	0.0171471	0.0463648	-1.24718
Zm00001d028117	-1.41113	4.44935	9.4014	0.0133682	0.0382482	-1.24878
Zm00001d010503	-1.41143	5.89339	14.696	0.00397319	0.0151631	-1.24905
Zm00001d014595	-1.41179	4.25033	10.5699	0.00992114	0.0304474	-1.24937
Zm00001d053188	-1.41313	4.13911	8.93966	0.0151292	0.0420985	-1.25056
Zm00001d025126	-1.41373	3.90511	10.1966	0.0108886	0.0327034	-1.25109
Zm00001d039749	-1.41375	4.4174	9.1886	0.0141465	0.0399521	-1.25111
Zm00001d046601	-1.41438	3.73151	9.81693	0.0119947	0.0352119	-1.25166
Zm00001d025098	-1.41471	4.01772	8.97603	0.0149805	0.0418005	-1.25195
Zm00001d015721	-1.41476	3.89425	11.1345	0.0086503	0.0274517	-1.252
Zm00001d011877	-1.41515	3.74433	9.43855	0.0132378	0.0379533	-1.25235
Zm00001d009233	-1.41553	5.13388	13.1784	0.00544359	0.019321	-1.25268
Zm00001d036473	-1.41665	3.89578	11.0551	0.00881634	0.0278049	-1.25367
Zm00001d031764	-1.4167	3.91926	8.39744	0.017578	0.0473011	-1.25372
Zm00001d020188	-1.41799	3.88507	9.26663	0.0138548	0.0393212	-1.25486
Zm00001d044366	-1.41805	5.26013	12.2251	0.00671542	0.022678	-1.25491
Zm00001d034491	-1.41832	3.8854	9.99972	0.0114458	0.0340062	-1.25515
Zm00001d044159	-1.41841	3.73471	10.8259	0.00931828	0.0289907	-1.25523
Zm00001d013547	-1.41886	4.72659	8.88326	0.0153635	0.0426229	-1.25563
Zm00001d044590	-1.41903	4.04378	10.247	0.0107514	0.0323883	-1.25577
Zm00001d052702	-1.41924	5.19223	13.277	0.00532971	0.0190126	-1.25596
Zm00001d015386	-1.41957	3.73565	8.49593	0.0170988	0.0462532	-1.25626
Zm00001d014569	-1.42001	5.16177	16.4973	0.00280876	0.0116811	-1.25664
Zm00001d049857	-1.42131	4.03431	12.1061	0.00689864	0.0231489	-1.2578
Zm00001d006246	-1.42176	4.93146	9.96055	0.0115607	0.0342723	-1.2582
Zm00001d047096	-1.42226	4.27997	12.0636	0.00696554	0.0233274	-1.25864
Zm00001d009152	-1.42241	4.94065	11.6026	0.00774546	0.0252351	-1.25877
Zm00001d017336	-1.42292	4.13608	8.44676	0.017336	0.046756	-1.25922
Zm00001d044065	-1.4232	4.0245	8.98392	0.0149485	0.0417291	-1.25947
Zm00001d036933	-1.42339	5.55119	13.1028	0.00553304	0.0195649	-1.25964
Zm00001d012761	-1.42374	4.30244	10.7659	0.00945554	0.0293268	-1.25994
Zm00001d045334	-1.42387	3.91333	9.80587	0.0120289	0.0352886	-1.26006
Zm00001d015788	-1.424	5.39469	18.0729	0.00211725	0.00944513	-1.26018
Zm00001d006451	-1.42473	5.24979	13.647	0.00492728	0.0179085	-1.26083
Zm00001d013263	-1.42481	4.65285	13.5023	0.00508009	0.018348	-1.26089
Zm00001d018986	-1.4249	4.04854	12.5416	0.00625621	0.0214908	-1.26098
Zm00001d004337	-1.42637	4.59021	15.3052	0.00352262	0.013863	-1.26228
Zm00001d026190	-1.42716	3.37587	8.79983	0.0157182	0.0433885	-1.26298
Zm00001d050430	-1.42763	4.01681	8.42142	0.0174598	0.0470218	-1.26339
Zm00001d022587	-1.4283	5.14437	10.4431	0.0102374	0.0311992	-1.26398
Zm00001d005105	-1.42845	5.01756	13.2956	0.00530846	0.0189502	-1.26412
Zm00001d019076	-1.42867	5.21568	15.6512	0.00329458	0.0131682	-1.26431
Zm00001d025232	-1.4291	3.57307	10.387	0.0103814	0.0315213	-1.26469
Zm00001d001487	-1.42934	5.77048	16.9575	0.00258138	0.0109627	-1.2649
Zm00001d049641	-1.42973	3.92976	9.25897	0.0138831	0.0393845	-1.26524
Zm00001d017202	-1.42976	5.09573	16.079	0.00303712	0.0124102	-1.26527
Zm00001d030677	-1.42996	5.69026	16.9712	0.00257496	0.0109414	-1.26545
Zm00001d005296	-1.43053	5.16209	16.8387	0.00263786	0.0111553	-1.26596
Zm00001d005297	-1.43053	5.16209	16.8387	0.00263786	0.0111553	-1.26596
Zm00001d036593	-1.43091	4.85582	14.7292	0.00394688	0.0150851	-1.26629
Zm00001d029394	-1.43145	3.91937	11.0667	0.00879183	0.0277567	-1.26677
Zm00001d040035	-1.43167	4.16497	11.4907	0.0079509	0.025733	-1.26696
Zm00001d021689	-1.43168	4.92565	15.9873	0.00309016	0.0125708	-1.26697
Zm00001d046306	-1.43179	4.36987	10.1084	0.011134	0.0332948	-1.26707
Zm00001d016805	-1.43216	4.63969	8.14962	0.0188593	0.0499067	-1.26739
Zm00001d050123	-1.4326	4.05474	12.3927	0.00646724	0.0220296	-1.26778
Zm00001d020454	-1.43404	4.62575	10.0565	0.0112815	0.0336213	-1.26906
Zm00001d046574	-1.4341	4.76671	16.4678	0.00282417	0.011729	-1.26911
Zm00001d000046	-1.43421	4.69853	13.4655	0.00511985	0.0184558	-1.26921
Zm00001d012284	-1.43446	3.5647	8.99597	0.0148998	0.0416197	-1.26943
Zm00001d023740	-1.4347	4.7207	8.56107	0.0167907	0.0455963	-1.26964
Zm00001d004070	-1.43496	4.49853	12.5457	0.00625057	0.0214752	-1.26988
Zm00001d052248	-1.43512	3.38226	9.13699	0.0143437	0.0403748	-1.27002
Zm00001d052249	-1.43512	3.38226	9.13699	0.0143437	0.0403748	-1.27002
Zm00001d012016	-1.43603	3.5787	9.59753	0.012697	0.0367994	-1.27082
Zm00001d048839	-1.43612	4.05756	12.8218	0.00588151	0.0205007	-1.2709
Zm00001d051584	-1.43634	4.05772	12.6036	0.00617083	0.0212723	-1.27109
Zm00001d029200	-1.43712	3.74976	10.728	0.00954333	0.0295268	-1.27179
Zm00001d002775	-1.43721	4.83361	16.5623	0.00277524	0.0115772	-1.27187
Zm00001d028425	-1.43753	3.7623	10.0661	0.0112542	0.0335618	-1.27215
Zm00001d000929	-1.43789	4.16998	11.571	0.00780275	0.0253758	-1.27247
Zm00001d033246	-1.43819	3.59309	8.66706	0.0163038	0.0445544	-1.27274
Zm00001d020002	-1.43893	4.17075	8.95379	0.0150712	0.0419759	-1.27339
Zm00001d053055	-1.43906	3.59384	9.59746	0.0126972	0.0367994	-1.2735
Zm00001d021716	-1.43914	4.04866	12.9998	0.00565777	0.0199106	-1.27357
Zm00001d006022	-1.4393	3.91396	12.257	0.00666719	0.0225638	-1.27372
Zm00001d036750	-1.43943	4.86976	8.46993	0.0172237	0.0465204	-1.27384
Zm00001d002972	-1.43968	4.74327	13.4009	0.00519055	0.0186534	-1.27405
Zm00001d044578	-1.43975	5.43717	13.1647	0.00545965	0.0193614	-1.27411
Zm00001d010578	-1.43975	4.67434	15.4516	0.00342387	0.0135548	-1.27412
Zm00001d025353	-1.43986	4.54273	9.24543	0.0139333	0.0395011	-1.27422
Zm00001d038657	-1.44083	5.0963	14.7135	0.00395928	0.0151206	-1.27507
Zm00001d012171	-1.44117	3.77742	8.82224	0.0156219	0.0431777	-1.27537
Zm00001d029975	-1.44206	4.81936	9.88451	0.011788	0.0347565	-1.27616
Zm00001d041627	-1.44391	3.7674	10.0055	0.0114289	0.0339662	-1.2778
Zm00001d041175	-1.44417	5.04711	15.993	0.00308681	0.0125666	-1.27803
Zm00001d044422	-1.44427	5.57491	15.5124	0.00338383	0.0134425	-1.27812
Zm00001d041950	-1.44433	6.35834	19.3392	0.00170796	0.00800882	-1.27817
Zm00001d009476	-1.44466	5.964	18.4726	0.00197624	0.00896074	-1.27846
Zm00001d033259	-1.44481	4.50643	8.2504	0.0183248	0.0488204	-1.27859
Zm00001d009589	-1.44505	4.19763	9.42095	0.0132993	0.0381013	-1.27881
Zm00001d045739	-1.44517	5.3326	16.7923	0.00266033	0.0112236	-1.27891
Zm00001d028526	-1.44521	4.06487	11.486	0.00795958	0.0257425	-1.27895
Zm00001d000822	-1.44525	4.27719	10.2995	0.0106108	0.0320467	-1.27898
Zm00001d000028	-1.44579	4.40172	14.2127	0.00438165	0.01636	-1.27946
Zm00001d045210	-1.44623	4.66999	12.0994	0.00690916	0.0231763	-1.27985
Zm00001d017422	-1.4463	4.1767	11.3256	0.00826604	0.0265172	-1.27991
Zm00001d040827	-1.44649	4.57699	11.7032	0.00756656	0.0248093	-1.28008
Zm00001d024386	-1.44703	4.29984	14.4009	0.00421676	0.0158716	-1.28056
Zm00001d040476	-1.44788	4.93864	14.8032	0.00388894	0.0149053	-1.28131
Zm00001d001978	-1.4483	3.74665	9.31543	0.0136761	0.0389101	-1.28168
Zm00001d002729	-1.44889	4.0565	13.1553	0.00547076	0.0193973	-1.2822
Zm00001d008929	-1.44899	4.32272	10.0549	0.011286	0.0336286	-1.2823
Zm00001d023797	-1.44919	3.92194	12.1817	0.00678142	0.0228555	-1.28247
Zm00001d029842	-1.44961	5.43011	15.6945	0.00326733	0.0130941	-1.28284
Zm00001d027975	-1.45004	3.77234	10.036	0.0113404	0.0337548	-1.28322
Zm00001d025333	-1.45063	3.7607	10.7425	0.00950968	0.0294573	-1.28374
Zm00001d025484	-1.45085	3.38165	8.85525	0.0154814	0.0428711	-1.28394
Zm00001d033429	-1.45144	5.08814	10.4148	0.0103096	0.0313642	-1.28446
Zm00001d036119	-1.4519	5.50041	12.848	0.00584783	0.0204038	-1.28487
Zm00001d049082	-1.45235	5.05364	17.4617	0.0023576	0.0102492	-1.28526
Zm00001d044980	-1.45252	4.73233	10.5295	0.0100207	0.0306783	-1.28541
Zm00001d012248	-1.45297	4.44888	8.27306	0.0182072	0.0485998	-1.28581
Zm00001d010522	-1.45314	5.65055	18.8126	0.0018652	0.00857757	-1.28596
Zm00001d022321	-1.45343	4.69485	16.459	0.00282877	0.0117418	-1.28622
Zm00001d008927	-1.45366	4.58274	11.7422	0.00749852	0.0246378	-1.28642
Zm00001d011871	-1.45376	4.60238	15.2967	0.00352849	0.0138777	-1.28651
Zm00001d010344	-1.45425	4.39819	12.4271	0.00641767	0.021907	-1.28694
Zm00001d026204	-1.4546	3.91458	11.6544	0.00765267	0.025012	-1.28726
Zm00001d037474	-1.45468	4.28476	10.4265	0.0102798	0.031288	-1.28733
Zm00001d043386	-1.45479	4.67686	14.1469	0.00444121	0.0165322	-1.28743
Zm00001d018117	-1.45482	3.76403	10.8306	0.00930768	0.0289693	-1.28746
Zm00001d028088	-1.4563	5.38301	14.4676	0.00416015	0.0157038	-1.28876
Zm00001d023583	-1.45709	5.21444	11.606	0.00773939	0.0252238	-1.28946
Zm00001d044833	-1.4575	3.79057	9.72219	0.0122919	0.0358906	-1.28982
Zm00001d045348	-1.45779	5.96875	9.72572	0.0122807	0.0358632	-1.29008
Zm00001d048890	-1.45825	3.77901	11.571	0.00780288	0.0253758	-1.29049
Zm00001d022570	-1.45861	3.90613	8.77164	0.0158403	0.0436149	-1.29081
Zm00001d025271	-1.4587	4.4121	13.3154	0.00528608	0.0188966	-1.29089
Zm00001d016695	-1.45904	4.51785	15.083	0.00367929	0.0143158	-1.29118
Zm00001d003106	-1.45915	5.27729	14.2425	0.00435504	0.0162917	-1.29128
Zm00001d024413	-1.45946	3.59759	10.5979	0.0098529	0.0302935	-1.29156
Zm00001d030031	-1.45969	4.19844	13.7532	0.00481882	0.0176009	-1.29176
Zm00001d008044	-1.45975	4.28883	10.4184	0.0103005	0.0313387	-1.29181
Zm00001d052148	-1.45978	4.78729	14.9332	0.00378979	0.0146275	-1.29184
Zm00001d001753	-1.46057	3.5985	10.1771	0.0109422	0.0328141	-1.29254
Zm00001d047156	-1.4607	3.59864	8.33513	0.0178898	0.0479521	-1.29266
Zm00001d003884	-1.46092	7.01993	18.2235	0.00206271	0.00926798	-1.29285
Zm00001d038650	-1.46114	4.85279	16.8432	0.00263568	0.0111497	-1.29304
Zm00001d051267	-1.46124	3.59899	10.4835	0.0101353	0.0309565	-1.29313
Zm00001d009693	-1.46131	6.08749	11.979	0.00710115	0.023654	-1.2932
Zm00001d030202	-1.46225	4.08995	9.61035	0.0126546	0.0367194	-1.29403
Zm00001d017152	-1.46305	6.1451	13.8601	0.00471245	0.0172996	-1.29473
Zm00001d020065	-1.46344	4.71245	12.4429	0.00639512	0.0218524	-1.29508
Zm00001d002351	-1.46364	5.15612	14.2192	0.00437586	0.0163447	-1.29526
Zm00001d045347	-1.46389	6.06581	9.95716	0.0115708	0.0342916	-1.29548
Zm00001d042445	-1.46483	3.60189	10.2353	0.0107831	0.0324562	-1.29631
Zm00001d003751	-1.46489	4.80072	16.1302	0.00300794	0.0123209	-1.29637
Zm00001d016182	-1.46598	3.92375	11.2955	0.00832522	0.0266644	-1.29733
Zm00001d011763	-1.46717	6.02683	14.1886	0.0044033	0.0164205	-1.29838
Zm00001d012404	-1.46723	4.5345	11.9712	0.00711386	0.0236864	-1.29844
Zm00001d012709	-1.46728	4.0826	9.68934	0.0123971	0.0361195	-1.29848
Zm00001d007068	-1.46791	5.10965	13.1183	0.00551457	0.0195172	-1.29904
Zm00001d022550	-1.46887	4.0726	13.1417	0.00548675	0.0194399	-1.29988
Zm00001d012799	-1.46892	5.82134	19.2247	0.00174073	0.00812743	-1.29993
Zm00001d025773	-1.46908	4.43077	14.4933	0.00413856	0.0156404	-1.30007
Zm00001d007886	-1.46982	3.59325	9.70283	0.0123538	0.0360178	-1.30072
Zm00001d002867	-1.47033	4.79576	15.4317	0.00343709	0.0135917	-1.30118
Zm00001d021667	-1.47045	5.6167	16.7896	0.00266166	0.011228	-1.30128
Zm00001d046535	-1.47051	4.98783	13.84	0.00473226	0.0173544	-1.30134
Zm00001d022928	-1.47066	4.17445	8.48126	0.0171691	0.0464146	-1.30147
Zm00001d029816	-1.47066	4.56748	9.26806	0.0138495	0.0393091	-1.30147
Zm00001d051687	-1.47107	6.12519	8.73756	0.0159895	0.0439268	-1.30183
Zm00001d032035	-1.47198	3.95202	11.4871	0.00795759	0.0257419	-1.30263
Zm00001d018437	-1.47244	4.41281	10.616	0.0098091	0.030177	-1.30304
Zm00001d052971	-1.47246	4.87095	14.6777	0.00398772	0.0152067	-1.30306
Zm00001d013208	-1.47345	3.16904	8.39921	0.0175692	0.047284	-1.30394
Zm00001d016799	-1.4738	4.77994	15.8988	0.00314244	0.0127336	-1.30425
Zm00001d036930	-1.47396	4.41403	12.7339	0.00599595	0.020805	-1.30439
Zm00001d021473	-1.474	3.79166	9.94227	0.0116149	0.034386	-1.30442
Zm00001d048407	-1.47509	3.41454	9.159	0.0142592	0.0402093	-1.30539
Zm00001d052209	-1.47529	6.1989	20.755	0.00135899	0.00675371	-1.30556
Zm00001d012857	-1.4754	3.80504	9.67286	0.0124503	0.0362476	-1.30566
Zm00001d053885	-1.47577	3.78097	11.1194	0.00868152	0.0275043	-1.30599
Zm00001d006322	-1.47717	4.6114	15.1412	0.00363745	0.0141921	-1.30723
Zm00001d010697	-1.47753	4.98913	10.6679	0.00968489	0.0298808	-1.30755
Zm00001d008257	-1.47852	4.4074	10.6903	0.00963173	0.0297647	-1.30843
Zm00001d005788	-1.47859	4.08044	11.5646	0.0078145	0.025403	-1.30848
Zm00001d026973	-1.47969	4.76607	12.0233	0.00702978	0.0234922	-1.30946
Zm00001d032250	-1.48006	4.10424	8.80095	0.0157133	0.0433816	-1.30979
Zm00001d007229	-1.48026	6.12495	16.1674	0.00298703	0.0122511	-1.30997
Zm00001d000012	-1.48028	5.11128	12.0275	0.00702312	0.023474	-1.30998
Zm00001d047142	-1.48103	4.76713	12.0578	0.00697477	0.023345	-1.31065
Zm00001d038146	-1.48234	4.20571	13.7499	0.00482213	0.0176114	-1.3118
Zm00001d026158	-1.48269	4.08373	13.6239	0.00495133	0.0179775	-1.31212
Zm00001d002718	-1.48271	3.79876	10.5798	0.00989704	0.0303961	-1.31213
Zm00001d039285	-1.48312	4.08407	13.3178	0.00528336	0.018892	-1.31249
Zm00001d005869	-1.48396	3.92658	8.60355	0.0165934	0.0451497	-1.31324
Zm00001d009727	-1.48431	3.17784	8.32301	0.0179513	0.0480707	-1.31355
Zm00001d016299	-1.48562	5.20626	17.7424	0.00224329	0.00987634	-1.3147
Zm00001d021557	-1.48566	3.63146	9.66663	0.0124705	0.0363036	-1.31474
Zm00001d018350	-1.48616	3.61913	10.4644	0.0101836	0.03107	-1.31519
Zm00001d038263	-1.4863	4.44462	10.7926	0.00939418	0.0291797	-1.31531
Zm00001d004778	-1.48631	5.00045	13.1974	0.0054214	0.0192735	-1.31532
Zm00001d011398	-1.48671	3.42398	9.96789	0.0115391	0.0342262	-1.31567
Zm00001d046303	-1.48753	4.91038	13.3858	0.00520734	0.0186954	-1.3164
Zm00001d005497	-1.4884	3.60825	8.22373	0.0184644	0.0491021	-1.31717
Zm00001d025316	-1.48871	3.9304	9.83606	0.0119358	0.0350906	-1.31744
Zm00001d012548	-1.48889	4.51172	8.59657	0.0166256	0.0452233	-1.3176
Zm00001d047020	-1.48918	4.54208	15.6782	0.00327759	0.0131222	-1.31786
Zm00001d009783	-1.4892	3.93077	9.55079	0.0128531	0.0371539	-1.31788
Zm00001d051986	-1.48974	3.78006	8.63197	0.016463	0.0448935	-1.31835
Zm00001d037493	-1.48983	3.4265	9.99413	0.0114621	0.0340444	-1.31843
Zm00001d013989	-1.48994	5.14399	17.8776	0.00219063	0.00969028	-1.31853
Zm00001d028691	-1.49036	5.547	18.5353	0.00195517	0.00888582	-1.3189
Zm00001d047364	-1.49043	4.21223	13.8194	0.00475264	0.0174112	-1.31896
Zm00001d016992	-1.49104	3.78113	8.63513	0.0164486	0.0448745	-1.31951
Zm00001d028450	-1.49105	4.81245	15.4116	0.00345048	0.013634	-1.31952
Zm00001d044517	-1.49109	3.8055	12.1298	0.00686156	0.0230546	-1.31955
Zm00001d012454	-1.49179	5.29016	18.2242	0.00206246	0.00926792	-1.32017
Zm00001d025295	-1.49188	4.31467	11.294	0.00832817	0.0266687	-1.32025
Zm00001d024866	-1.49277	4.22508	14.6273	0.00402831	0.0153258	-1.32104
Zm00001d012626	-1.4946	4.92284	11.2183	0.00847914	0.0270335	-1.32266
Zm00001d046342	-1.49479	5.39535	19.8113	0.00158055	0.00756277	-1.32282
Zm00001d028807	-1.49486	3.63888	10.1858	0.0109183	0.0327573	-1.32289
Zm00001d025060	-1.4951	4.216	13.1722	0.00545091	0.0193374	-1.32309
Zm00001d004924	-1.49571	4.09423	13.4674	0.00511775	0.0184499	-1.32364
Zm00001d007187	-1.49602	4.65595	15.9539	0.00310978	0.0126283	-1.32391
Zm00001d019623	-1.49725	5.31837	11.152	0.00861428	0.0273795	-1.325
Zm00001d010705	-1.49822	3.18911	8.55759	0.0168069	0.0456373	-1.32585
Zm00001d019108	-1.49848	4.35188	12.238	0.00669582	0.0226355	-1.32609
Zm00001d053040	-1.49848	6.07485	19.719	0.00160454	0.00764722	-1.32609
Zm00001d050952	-1.49906	3.43395	9.66555	0.012474	0.0363111	-1.3266
Zm00001d012147	-1.49911	3.81199	11.9745	0.00710854	0.0236766	-1.32664
Zm00001d037831	-1.49944	3.62989	10.9077	0.00913527	0.0285759	-1.32693
Zm00001d001286	-1.49964	4.9802	15.9707	0.00309991	0.0126039	-1.32711
Zm00001d010645	-1.50066	4.24241	14.0099	0.00456832	0.0168878	-1.32802
Zm00001d048887	-1.50096	4.33261	13.3791	0.00521473	0.0187116	-1.32828
Zm00001d017876	-1.50131	3.61871	9.69569	0.0123767	0.0360709	-1.32859
Zm00001d037939	-1.50245	4.61216	8.99215	0.0149152	0.041651	-1.3296
Zm00001d011922	-1.5031	3.62018	9.9175	0.0116888	0.0345332	-1.33017
Zm00001d002956	-1.5032	3.96548	12.1366	0.00685107	0.0230367	-1.33026
Zm00001d009803	-1.50323	3.42401	8.60812	0.0165723	0.0451171	-1.33029
Zm00001d047722	-1.50364	3.19351	9.0225	0.0147931	0.0414018	-1.33066
Zm00001d025533	-1.50402	3.20792	8.22285	0.0184691	0.0491111	-1.33099
Zm00001d034096	-1.50407	3.9428	10.1921	0.0109012	0.0327276	-1.33104
Zm00001d014867	-1.50416	4.82297	17.6713	0.00227157	0.00996719	-1.33112
Zm00001d010759	-1.50439	4.25643	11.1312	0.00865717	0.027466	-1.33132
Zm00001d031231	-1.50445	3.65937	8.42004	0.0174666	0.0470336	-1.33137
Zm00001d043171	-1.50467	5.49143	18.832	0.00185912	0.00855863	-1.33157
Zm00001d020892	-1.5049	4.22389	11.065	0.00879553	0.02776	-1.33177
Zm00001d020256	-1.50571	4.4396	9.99874	0.0114486	0.0340121	-1.33249
Zm00001d030152	-1.50691	4.08067	9.03552	0.0147411	0.0412858	-1.33355
Zm00001d045427	-1.50697	3.79403	10.3624	0.0104451	0.031668	-1.3336
Zm00001d014887	-1.50729	5.33158	18.5899	0.00193702	0.00882486	-1.33388
Zm00001d045072	-1.50734	3.64897	10.7862	0.00940866	0.0292161	-1.33393
Zm00001d021282	-1.50736	3.7943	8.54978	0.0168435	0.0456955	-1.33394
Zm00001d047252	-1.50775	5.51602	18.0004	0.00214415	0.00952886	-1.3343
Zm00001d044599	-1.50809	3.80708	12.1265	0.00686678	0.0230679	-1.3346
Zm00001d038689	-1.50911	4.22729	14.5344	0.00410432	0.0155418	-1.3355
Zm00001d031839	-1.50929	4.3606	15.2884	0.00353419	0.0138935	-1.33566
Zm00001d008306	-1.50938	4.35002	15.4706	0.00341129	0.0135157	-1.33573
Zm00001d021490	-1.50939	3.42904	10.0173	0.0113945	0.0338898	-1.33575
Zm00001d014732	-1.51001	4.44306	14.2719	0.0043289	0.0162079	-1.33629
Zm00001d015497	-1.51003	6.35734	20.7829	0.00135305	0.00673532	-1.33631
Zm00001d050336	-1.51047	3.62614	10.2086	0.0108558	0.032625	-1.3367
Zm00001d036798	-1.51078	4.37246	12.3716	0.00649785	0.0221074	-1.33697
Zm00001d050472	-1.51083	3.45682	8.15824	0.0188128	0.0498086	-1.33702
Zm00001d046792	-1.51085	3.8337	9.52782	0.0129307	0.0372989	-1.33704
Zm00001d045731	-1.51145	4.21823	12.0899	0.00692398	0.023216	-1.33757
Zm00001d034885	-1.51149	4.53996	13.2664	0.00534181	0.0190384	-1.33761
Zm00001d000731	-1.51162	6.6108	20.0516	0.00152018	0.00733578	-1.33772
Zm00001d033370	-1.51184	4.98117	17.5772	0.00230969	0.0100946	-1.33791
Zm00001d028910	-1.5119	4.96339	14.7235	0.00395136	0.0150977	-1.33797
Zm00001d033310	-1.51208	3.44455	9.25968	0.0138805	0.0393799	-1.33813
Zm00001d047280	-1.51255	3.6532	10.8572	0.00924761	0.0288212	-1.33854
Zm00001d013722	-1.51257	3.82286	10.875	0.00920777	0.0287429	-1.33856
Zm00001d000938	-1.51336	4.21978	10.482	0.0101392	0.0309635	-1.33926
Zm00001d030048	-1.51381	5.43667	17.2353	0.00245502	0.0105602	-1.33965
Zm00001d004139	-1.5144	4.66096	16.5016	0.00280656	0.0116756	-1.34017
Zm00001d021350	-1.51487	5.55953	18.978	0.00181398	0.00840028	-1.34059
Zm00001d033046	-1.51522	3.98695	12.1574	0.00681894	0.0229484	-1.34091
Zm00001d005429	-1.51545	4.83211	15.241	0.00356709	0.0139874	-1.3411
Zm00001d045926	-1.51572	3.8011	9.88015	0.0118013	0.0347797	-1.34135
Zm00001d013979	-1.51632	4.93361	13.7666	0.00480529	0.0175612	-1.34188
Zm00001d012504	-1.51644	3.44805	9.23749	0.0139629	0.0395649	-1.34198
Zm00001d008833	-1.51677	4.4279	8.67285	0.0162777	0.044506	-1.34228
Zm00001d006098	-1.51694	4.50041	10.6826	0.00965007	0.0298005	-1.34242
Zm00001d025964	-1.51733	3.63169	10.2521	0.0107378	0.032355	-1.34277
Zm00001d042621	-1.51751	4.64387	15.9319	0.00312276	0.0126704	-1.34293
Zm00001d009090	-1.5177	4.21237	8.80287	0.0157051	0.0433646	-1.34309
Zm00001d010546	-1.51849	4.2568	11.9547	0.0071408	0.0237456	-1.34379
Zm00001d044575	-1.51913	5.0443	18.3378	0.00202248	0.00913543	-1.34436
Zm00001d002640	-1.51939	5.24969	20.0091	0.00153065	0.00737721	-1.34459
Zm00001d032460	-1.51942	5.16761	9.86662	0.0118423	0.0348757	-1.34462
Zm00001d027239	-1.51963	5.37285	14.9009	0.00381414	0.0146983	-1.34481
Zm00001d048899	-1.52073	4.59775	12.0135	0.00704559	0.023529	-1.34578
Zm00001d015698	-1.52084	4.78987	9.60839	0.0126611	0.0367322	-1.34588
Zm00001d020765	-1.52118	4.23703	13.4002	0.00519141	0.0186536	-1.34618
Zm00001d002190	-1.52182	4.32821	8.42807	0.0174272	0.0469534	-1.34674
Zm00001d024454	-1.52184	4.5684	16.4338	0.00284206	0.0117859	-1.34677
Zm00001d033783	-1.52196	4.12676	11.5971	0.00775547	0.0252594	-1.34687
Zm00001d013360	-1.52209	3.4526	8.62453	0.016497	0.0449705	-1.34699
Zm00001d052917	-1.52224	4.47359	13.142	0.00548649	0.0194399	-1.34712
Zm00001d021227	-1.52262	4.38202	13.8049	0.00476703	0.0174525	-1.34745
Zm00001d018597	-1.52323	3.8315	10.5571	0.00995238	0.030529	-1.348
Zm00001d042977	-1.52334	4.66819	12.1155	0.006884	0.0231037	-1.34809
Zm00001d048004	-1.52374	4.25009	9.3863	0.0134216	0.0383758	-1.34844
Zm00001d050091	-1.52434	4.48564	15.2534	0.00355844	0.0139646	-1.34897
Zm00001d006209	-1.52443	4.55039	14.1903	0.0044018	0.0164164	-1.34905
Zm00001d022434	-1.52492	3.99473	9.20155	0.0140976	0.0398398	-1.34948
Zm00001d047521	-1.5254	4.21857	9.66147	0.0124872	0.0363362	-1.34991
Zm00001d010455	-1.52554	4.38437	12.8747	0.00581385	0.0203228	-1.35003
Zm00001d052657	-1.5259	3.63866	10.6026	0.00984147	0.0302623	-1.35035
Zm00001d010525	-1.52611	3.98402	13.8734	0.00469947	0.0172633	-1.35054
Zm00001d020779	-1.52618	3.63891	9.8694	0.0118339	0.0348548	-1.35061
Zm00001d033025	-1.52731	4.95804	14.1481	0.00444007	0.0165308	-1.3516
Zm00001d005348	-1.52761	3.64006	9.54479	0.0128733	0.0371939	-1.35187
Zm00001d015872	-1.52771	5.21597	15.8541	0.00316929	0.0128114	-1.35195
Zm00001d044253	-1.52816	5.20792	9.93413	0.0116391	0.0344315	-1.35236
Zm00001d035194	-1.5285	4.83329	17.5412	0.0023245	0.010138	-1.35265
Zm00001d037369	-1.52871	3.65362	10.7334	0.00953067	0.029506	-1.35284
Zm00001d017323	-1.52893	4.72697	10.8222	0.00932673	0.0290145	-1.35303
Zm00001d033479	-1.52957	5.56524	10.5783	0.00990068	0.0304016	-1.3536
Zm00001d003112	-1.53001	3.21491	8.70883	0.0161167	0.0441676	-1.35399
Zm00001d023399	-1.53061	5.2575	9.81577	0.0119983	0.0352198	-1.35452
Zm00001d024242	-1.53088	5.21852	14.9651	0.00376594	0.0145599	-1.35476
Zm00001d030027	-1.53101	4.45999	9.50274	0.0130161	0.0374847	-1.35488
Zm00001d034872	-1.53158	3.81394	10.2547	0.0107307	0.0323385	-1.35538
Zm00001d004412	-1.53172	4.71966	10.6106	0.00982207	0.0302121	-1.35551
Zm00001d027276	-1.53219	4.00063	10.3315	0.0105261	0.0318493	-1.35592
Zm00001d003841	-1.5323	4.58691	16.6924	0.00270949	0.0113891	-1.35602
Zm00001d005470	-1.53294	3.44815	8.96939	0.0150076	0.0418581	-1.35658
Zm00001d043387	-1.533	3.4482	9.84092	0.0119208	0.0350529	-1.35664
Zm00001d046148	-1.53505	4.56901	16.5785	0.00276694	0.0115526	-1.35845
Zm00001d004115	-1.53506	5.07455	17.3995	0.00238387	0.0103432	-1.35846
Zm00001d002173	-1.53519	3.21912	8.84781	0.0155129	0.042925	-1.35858
Zm00001d047576	-1.5352	3.67154	11.1578	0.00860218	0.02735	-1.35859
Zm00001d052195	-1.5352	3.81687	10.242	0.010765	0.0324192	-1.35859
Zm00001d031501	-1.53556	3.45027	9.9061	0.011723	0.0346116	-1.3589
Zm00001d034074	-1.53593	4.10413	8.85235	0.0154937	0.0428955	-1.35923
Zm00001d052998	-1.5361	5.38607	19.3041	0.0017179	0.00804677	-1.35938
Zm00001d033552	-1.53739	4.5508	11.6501	0.00766042	0.0250297	-1.36052
Zm00001d038206	-1.53765	5.06792	18.8712	0.00184685	0.00851412	-1.36075
Zm00001d049008	-1.53799	5.87691	21.2846	0.00125129	0.00634662	-1.36105
Zm00001d018711	-1.53867	4.12893	11.9923	0.00707963	0.0236024	-1.36165
Zm00001d017622	-1.53892	3.22215	8.70735	0.0161233	0.0441826	-1.36188
Zm00001d037277	-1.53895	5.44948	15.3672	0.00348039	0.0137217	-1.36191
Zm00001d021504	-1.53923	4.26259	15.022	0.00372381	0.0144327	-1.36215
Zm00001d007631	-1.53927	4.11809	11.4882	0.00795552	0.0257395	-1.36218
Zm00001d043197	-1.53958	3.98319	13.2186	0.00539676	0.0192007	-1.36246
Zm00001d023405	-1.54008	4.4175	8.98021	0.0149636	0.0417652	-1.36291
Zm00001d047884	-1.54028	5.20948	19.1313	0.00176802	0.00823521	-1.36308
Zm00001d033003	-1.54062	3.98403	9.85995	0.0118626	0.0349133	-1.36338
Zm00001d038598	-1.5407	4.57357	16.4974	0.00280873	0.0116811	-1.36345
Zm00001d027627	-1.54081	3.83357	8.3089	0.0180231	0.0482136	-1.36355
Zm00001d052749	-1.54101	3.22385	8.44418	0.0173486	0.0467834	-1.36373
Zm00001d011212	-1.54106	3.98439	12.8002	0.00590933	0.0205756	-1.36377
Zm00001d014025	-1.54215	3.6645	11.9141	0.0072074	0.0239224	-1.36474
Zm00001d030346	-1.54227	5.92826	21.2754	0.00125306	0.00635398	-1.36484
Zm00001d042290	-1.54262	3.99737	14.2005	0.00439261	0.0163915	-1.36515
Zm00001d006001	-1.54339	3.45662	9.55971	0.0128232	0.0370902	-1.36583
Zm00001d050514	-1.54382	3.22613	9.64426	0.0125433	0.0364694	-1.36622
Zm00001d009070	-1.54383	3.2402	8.61331	0.0165485	0.04507	-1.36622
Zm00001d010229	-1.54404	3.99852	14.1106	0.0044744	0.0166207	-1.36641
Zm00001d030801	-1.54435	3.4574	9.95136	0.0115879	0.0343269	-1.36668
Zm00001d002140	-1.54465	4.13376	14.3396	0.00426964	0.0160296	-1.36695
Zm00001d031620	-1.54537	4.69577	15.8122	0.00319465	0.0128886	-1.36759
Zm00001d027466	-1.54591	4.37953	15.5457	0.00336213	0.0133767	-1.36806
Zm00001d027253	-1.54594	4.47205	14.8135	0.00388098	0.0148819	-1.36809
Zm00001d036107	-1.54666	3.97724	10.7353	0.00952627	0.0294994	-1.36872
Zm00001d004243	-1.54797	4.80241	8.33218	0.0179047	0.0479823	-1.36988
Zm00001d047038	-1.54826	5.07643	12.3878	0.00647431	0.0220426	-1.37014
Zm00001d004090	-1.5488	3.46101	10.2679	0.0106951	0.0322545	-1.37062
Zm00001d010621	-1.54882	4.11455	8.70495	0.016134	0.0442026	-1.37063
Zm00001d003925	-1.54902	4.24859	10.5868	0.00987993	0.0303615	-1.37082
Zm00001d005762	-1.54924	4.60061	17.3644	0.00239885	0.0103859	-1.37101
Zm00001d027921	-1.54964	3.46169	10.238	0.010776	0.032444	-1.37136
Zm00001d035018	-1.54967	4.79147	16.0553	0.00305072	0.0124479	-1.37139
Zm00001d029852	-1.54972	4.93322	18.5673	0.00194451	0.00885017	-1.37143
Zm00001d045039	-1.54998	4.95164	15.5752	0.00334308	0.0133267	-1.37167
Zm00001d025989	-1.55003	5.33713	20.4859	0.00141808	0.00696157	-1.37171
Zm00001d021646	-1.55075	3.47584	8.21134	0.0185297	0.0492267	-1.37235
Zm00001d023390	-1.55104	4.58191	15.7162	0.00325382	0.013054	-1.3726
Zm00001d028950	-1.55111	4.2722	8.93729	0.015139	0.0421226	-1.37266
Zm00001d002279	-1.5513	4.01614	10.659	0.00970593	0.0299325	-1.37283
Zm00001d038384	-1.55159	3.23244	9.11416	0.0144319	0.0405824	-1.37309
Zm00001d003712	-1.5518	5.04453	14.1801	0.00441099	0.0164444	-1.37327
Zm00001d022106	-1.55255	3.85522	12.5337	0.00626723	0.0215211	-1.37394
Zm00001d009612	-1.55259	4.67217	16.3115	0.00290753	0.0119975	-1.37397
Zm00001d004413	-1.55266	4.72701	8.52089	0.0169799	0.0459712	-1.37403
Zm00001d024897	-1.55271	3.49077	9.17029	0.0142161	0.0401195	-1.37408
Zm00001d001580	-1.55356	3.47813	9.90164	0.0117364	0.0346406	-1.37483
Zm00001d003052	-1.5536	3.24813	8.29821	0.0180778	0.0483202	-1.37487
Zm00001d013855	-1.55386	5.10131	9.94103	0.0116186	0.0343943	-1.3751
Zm00001d034662	-1.55408	3.67414	12.0344	0.00701199	0.0234486	-1.3753
Zm00001d013811	-1.55519	3.47949	10.2073	0.0108593	0.032633	-1.37628
Zm00001d010395	-1.55571	4.14272	14.2235	0.004372	0.0163349	-1.37674
Zm00001d009639	-1.5561	3.25017	8.29316	0.0181036	0.0483662	-1.37708
Zm00001d053304	-1.55617	4.13176	11.3076	0.00830122	0.0266051	-1.37714
Zm00001d022926	-1.55725	3.9975	13.5498	0.00502933	0.0182033	-1.37809
Zm00001d049938	-1.55747	4.15544	10.3247	0.010544	0.0318912	-1.37829
Zm00001d012453	-1.558	3.25172	8.24935	0.0183303	0.0488316	-1.37876
Zm00001d027286	-1.55849	3.84787	12.1582	0.00681762	0.0229459	-1.3792
Zm00001d013458	-1.55908	3.46936	10.7465	0.00950026	0.0294375	-1.37972
Zm00001d010108	-1.5596	3.48306	9.47893	0.0130978	0.037675	-1.38017
Zm00001d022694	-1.56008	3.48344	11.1729	0.00857131	0.0272696	-1.3806
Zm00001d048259	-1.56111	5.01205	18.5617	0.00194636	0.00885442	-1.38151
zma-MIR2118g	-1.56113	4.79117	18.4428	0.00198632	0.00899916	-1.38154
Zm00001d033726	-1.56194	4.12516	10.1237	0.011091	0.0331886	-1.38225
Zm00001d018678	-1.56203	4.31402	9.43821	0.0132389	0.0379533	-1.38232
Zm00001d038139	-1.56205	4.58077	14.9197	0.00379993	0.0146594	-1.38235
Zm00001d024148	-1.56231	3.86319	9.32306	0.0136484	0.038849	-1.38257
Zm00001d008842	-1.56256	5.47593	9.24702	0.0139274	0.0394901	-1.38279
Zm00001d042756	-1.56325	3.87609	10.9895	0.00895656	0.0281383	-1.3834
Zm00001d026685	-1.56525	3.85337	12.7555	0.00596763	0.0207417	-1.38517
Zm00001d032313	-1.56555	4.12811	8.18967	0.0186446	0.0494804	-1.38544
Zm00001d019626	-1.56625	5.60116	11.3122	0.00829235	0.0265874	-1.38606
Zm00001d009605	-1.56663	4.43899	9.5897	0.012723	0.0368687	-1.3864
Zm00001d047608	-1.56723	4.15205	12.9869	0.00567356	0.0199518	-1.38693
Zm00001d052668	-1.56743	4.73328	12.8884	0.00579646	0.0202765	-1.3871
Zm00001d007624	-1.56771	4.27466	13.7433	0.00482874	0.0176273	-1.38735
Zm00001d006829	-1.56905	3.68631	12.208	0.00674128	0.0227457	-1.38854
Zm00001d052227	-1.56928	5.24128	19.0378	0.00179587	0.0083312	-1.38874
Zm00001d030895	-1.56978	3.49132	11.2604	0.00839471	0.0268211	-1.38919
Zm00001d004215	-1.56995	3.85718	12.8624	0.00582951	0.0203539	-1.38934
Zm00001d015886	-1.56997	3.67438	10.0903	0.0111854	0.0334024	-1.38936
Zm00001d037934	-1.57	3.26145	8.94479	0.0151082	0.0420608	-1.38938
Zm00001d011886	-1.57082	3.68774	12.7501	0.00597468	0.0207552	-1.3901
Zm00001d049452	-1.57115	3.66275	8.19423	0.0186204	0.0494328	-1.3904
Zm00001d037982	-1.57126	4.90507	10.4113	0.0103186	0.0313817	-1.3905
Zm00001d039808	-1.57168	4.93273	17.027	0.00254906	0.0108597	-1.39086
Zm00001d025178	-1.57183	4.47237	9.49986	0.0130259	0.0375048	-1.391
Zm00001d009005	-1.57216	4.79055	16.2802	0.00292457	0.0120538	-1.39129
Zm00001d048439	-1.57236	4.0567	8.60729	0.0165762	0.0451171	-1.39147
Zm00001d014017	-1.5738	5.37232	16.7988	0.00265715	0.0112139	-1.39275
Zm00001d003840	-1.57427	5.896	18.5656	0.00194507	0.00885121	-1.39316
Zm00001d006368	-1.57481	3.70368	10.8936	0.00916648	0.0286437	-1.39363
Zm00001d006704	-1.5754	4.58155	8.51365	0.0170142	0.0460437	-1.39416
Zm00001d003848	-1.57554	2.97146	8.23099	0.0184263	0.0490407	-1.39428
Zm00001d051526	-1.57567	4.02415	13.4271	0.00516174	0.0185726	-1.3944
Zm00001d046855	-1.57569	4.00076	10.264	0.0107058	0.0322758	-1.39442
Zm00001d049091	-1.57618	5.12778	13.9207	0.00465346	0.0171253	-1.39485
Zm00001d022465	-1.57657	5.65306	21.6487	0.00118326	0.00608552	-1.39519
Zm00001d013830	-1.57676	4.37262	9.75705	0.0121815	0.0356401	-1.39536
Zm00001d003950	-1.5769	4.02512	14.6821	0.00398425	0.0151967	-1.39548
Zm00001d004554	-1.57732	3.51073	8.94333	0.0151141	0.0420714	-1.39586
Zm00001d044631	-1.5774	4.48717	12.0446	0.00699572	0.0234004	-1.39593
Zm00001d038351	-1.57742	4.82355	14.7309	0.00394552	0.0150839	-1.39595
Zm00001d002873	-1.57776	4.86371	15.4542	0.00342212	0.0135525	-1.39625
Zm00001d018266	-1.57777	4.67297	10.1246	0.0110885	0.033184	-1.39625
Zm00001d005846	-1.57804	4.947	19.9384	0.00154827	0.0074397	-1.3965
Zm00001d040515	-1.57818	3.26811	9.2846	0.0137887	0.0391669	-1.39662
Zm00001d053406	-1.57843	3.48507	10.3781	0.0104044	0.031574	-1.39684
Zm00001d050141	-1.57873	4.86456	17.3725	0.0023954	0.0103767	-1.3971
Zm00001d002757	-1.57905	4.60459	16.5917	0.0027602	0.0115397	-1.39739
Zm00001d036123	-1.57927	4.893	18.3527	0.00201729	0.00911679	-1.39758
Zm00001d034998	-1.57946	5.84358	21.1953	0.0012687	0.00641166	-1.39775
Zm00001d040674	-1.5805	5.58218	17.0902	0.00252006	0.0107712	-1.39867
Zm00001d009891	-1.58139	4.05227	10.9596	0.00902144	0.0282967	-1.39946
Zm00001d017557	-1.58167	4.61681	12.0538	0.00698117	0.0233637	-1.39971
Zm00001d028399	-1.58174	3.50102	10.7935	0.009392	0.0291783	-1.39977
Zm00001d040624	-1.58217	4.54278	9.73516	0.0122507	0.0357933	-1.40015
Zm00001d005593	-1.58229	3.84297	8.25712	0.0182898	0.0487405	-1.40025
Zm00001d014015	-1.58232	3.48826	10.836	0.00929536	0.0289401	-1.40028
Zm00001d026288	-1.58282	6.02869	23.3815	0.000915235	0.00501956	-1.40073
Zm00001d043309	-1.58293	4.59766	15.2265	0.00357717	0.0140157	-1.40082
Zm00001d022072	-1.58318	3.6851	8.49862	0.0170859	0.0462248	-1.40105
Zm00001d007633	-1.5836	4.53357	15.0824	0.00367979	0.0143158	-1.40141
Zm00001d048125	-1.58365	5.36186	12.1201	0.00687671	0.0230892	-1.40146
Zm00001d050119	-1.58367	5.14235	15.4721	0.0034103	0.0135134	-1.40147
Zm00001d034089	-1.5842	4.299	14.8485	0.00385404	0.0147952	-1.40195
Zm00001d038524	-1.58451	4.01961	13.6594	0.00491451	0.0178704	-1.40222
Zm00001d035731	-1.58453	4.86924	18.1312	0.00209595	0.0093788	-1.40224
Zm00001d024466	-1.58462	4.04311	13.2917	0.00531295	0.0189615	-1.40232
Zm00001d013583	-1.58494	3.47715	8.32304	0.0179511	0.0480707	-1.4026
Zm00001d026357	-1.58507	4.99826	10.1531	0.0110088	0.0329757	-1.40271
Zm00001d010121	-1.58529	5.71643	20.4775	0.00141996	0.00696904	-1.40291
Zm00001d030951	-1.58558	4.33311	10.1024	0.0111508	0.0333299	-1.40317
Zm00001d050178	-1.58606	4.5801	9.2236	0.0140147	0.0396544	-1.40359
Zm00001d011898	-1.58627	4.02104	13.6943	0.00487863	0.0177663	-1.40378
Zm00001d042564	-1.58644	5.00582	14.8104	0.00388341	0.0148861	-1.40393
Zm00001d015874	-1.58751	5.20514	15.7159	0.003254	0.013054	-1.40487
Zm00001d029232	-1.5877	3.71411	8.18234	0.0186837	0.0495572	-1.40504
Zm00001d047211	-1.5878	3.70153	13.1423	0.00548609	0.0194399	-1.40513
Zm00001d003186	-1.58807	4.76517	11.5179	0.00790034	0.0256054	-1.40537
Zm00001d032661	-1.58809	4.6911	14.8762	0.00383291	0.014746	-1.40539
Zm00001d047526	-1.58819	3.70182	10.8037	0.00936875	0.0291199	-1.40548
Zm00001d048904	-1.58827	3.49309	10.9362	0.00907243	0.0284124	-1.40555
Zm00001d038007	-1.58867	4.4035	14.4911	0.00414036	0.0156429	-1.4059
Zm00001d014040	-1.58868	4.94655	12.943	0.00572793	0.0200888	-1.40591
Zm00001d039412	-1.58879	3.88464	11.2366	0.00844228	0.0269382	-1.40601
Zm00001d019808	-1.58887	4.40366	14.583	0.00406436	0.015427	-1.40608
Zm00001d021740	-1.58989	4.85492	13.1875	0.00543298	0.0192923	-1.40699
Zm00001d004306	-1.59025	3.49471	10.6532	0.0097199	0.0299662	-1.4073
Zm00001d008074	-1.59025	6.1548	22.884	0.000983805	0.00528814	-1.4073
Zm00001d043324	-1.59047	4.8554	12.3508	0.00652826	0.022193	-1.4075
Zm00001d022834	-1.59057	3.71647	11.5342	0.00787021	0.0255332	-1.40758
Zm00001d005157	-1.59068	4.18238	15.2867	0.00353538	0.0138965	-1.40768
Zm00001d032260	-1.59115	4.28272	11.9666	0.00712133	0.023703	-1.4081
Zm00001d004754	-1.59141	4.29387	15.087	0.00367644	0.0143086	-1.40833
Zm00001d032946	-1.59172	3.26509	9.06602	0.0146203	0.0410206	-1.40861
Zm00001d035154	-1.59227	4.29457	15.0525	0.00370152	0.0143762	-1.40909
Zm00001d031577	-1.59281	4.71452	18.2383	0.00205746	0.00924763	-1.40956
Zm00001d052312	-1.59283	6.64428	18.2487	0.00205375	0.00923704	-1.40958
Zm00001d007522	-1.59314	3.49707	10.8074	0.0093604	0.0290986	-1.40986
Zm00001d011144	-1.59325	3.88822	12.1693	0.00680047	0.022902	-1.40996
Zm00001d049480	-1.59344	4.94128	13.3113	0.00529075	0.0189081	-1.41012
Zm00001d001575	-1.59383	3.69379	11.2927	0.00833059	0.0266707	-1.41047
Zm00001d043730	-1.59403	4.59663	10.4358	0.0102559	0.0312397	-1.41064
Zm00001d034000	-1.59475	5.82131	10.6781	0.00966065	0.0298211	-1.41128
Zm00001d050810	-1.59482	3.28163	9.53814	0.0128958	0.0372227	-1.41134
Zm00001d021881	-1.5952	3.28194	9.30477	0.0137149	0.038995	-1.41168
Zm00001d026983	-1.5958	3.51246	11.3938	0.00813405	0.0261786	-1.41221
Zm00001d037696	-1.59607	3.28265	8.88228	0.0153675	0.0426295	-1.41245
Zm00001d028796	-1.59671	3.89105	12.5997	0.00617615	0.021286	-1.41301
Zm00001d040467	-1.59675	4.76265	9.09584	0.0145032	0.0407566	-1.41305
Zm00001d025933	-1.59742	5.61905	22.6892	0.00101235	0.00540298	-1.41364
Zm00001d037947	-1.59766	3.87966	11.5041	0.00792579	0.025673	-1.41386
Zm00001d001403	-1.59775	5.18792	20.573	0.00139862	0.0068972	-1.41394
Zm00001d031107	-1.59785	4.33205	13.2439	0.00536754	0.0191162	-1.41402
Zm00001d023658	-1.59882	4.3905	10.5502	0.00996948	0.030567	-1.41488
Zm00001d038803	-1.59888	4.28898	14.0138	0.00456468	0.0168823	-1.41494
Zm00001d050285	-1.59939	3.86897	11.4515	0.0080242	0.0258953	-1.41539
Zm00001d005215	-1.5994	2.99086	8.72428	0.0160481	0.0440168	-1.4154
Zm00001d027018	-1.59969	3.27157	9.93647	0.0116321	0.0344257	-1.41566
Zm00001d003240	-1.59972	4.44443	15.3442	0.003496	0.0137744	-1.41568
Zm00001d008568	-1.59974	4.28968	10.9785	0.0089804	0.0281883	-1.4157
Zm00001d024051	-1.60008	3.28591	8.23343	0.0184135	0.0490125	-1.416
Zm00001d029068	-1.60038	4.50581	11.4319	0.00806143	0.0259876	-1.41627
Zm00001d020009	-1.60131	4.16837	11.7155	0.00754501	0.024749	-1.41709
Zm00001d037651	-1.60235	3.25975	8.32381	0.0179472	0.0480696	-1.41801
Zm00001d025982	-1.60242	3.7134	12.4121	0.00643929	0.0219616	-1.41807
Zm00001d033518	-1.60274	3.27406	10.4989	0.0100967	0.0308699	-1.41836
Zm00001d011786	-1.60279	5.50858	19.0135	0.00180322	0.0083613	-1.4184
Zm00001d010719	-1.60303	3.85983	8.50012	0.0170787	0.0462086	-1.41861
Zm00001d016408	-1.60309	4.81558	17.6152	0.00229421	0.0100429	-1.41866
Zm00001d016400	-1.60401	4.02378	10.4934	0.0101105	0.0308952	-1.41948
Zm00001d038512	-1.60448	4.15966	11.191	0.0085345	0.0271746	-1.41989
Zm00001d036931	-1.6051	3.27598	10.5509	0.0099678	0.0305643	-1.42045
Zm00001d036549	-1.6056	5.47373	12.5677	0.00622012	0.0213932	-1.42088
Zm00001d025705	-1.60584	3.27658	9.88387	0.01179	0.0347597	-1.4211
Zm00001d035234	-1.60585	3.72886	12.3249	0.00656618	0.0222856	-1.42111
Zm00001d050155	-1.60613	4.57263	12.1939	0.00676276	0.0228044	-1.42135
Zm00001d048241	-1.60651	4.72566	16.8951	0.00261087	0.0110651	-1.42169
Zm00001d044672	-1.60663	4.17268	9.88874	0.0117753	0.0347293	-1.4218
Zm00001d002719	-1.60731	4.06152	12.4737	0.0063513	0.0217487	-1.4224
Zm00001d023969	-1.60786	3.27823	10.5313	0.0100162	0.0306671	-1.42288
Zm00001d019830	-1.609	4.77261	9.10765	0.0144572	0.0406473	-1.42389
Zm00001d035775	-1.60917	3.52335	11.5221	0.00789248	0.0255842	-1.42404
Zm00001d021812	-1.60921	3.29334	9.39518	0.0133902	0.0382998	-1.42408
Zm00001d001929	-1.60964	3.52373	11.994	0.00707693	0.0235956	-1.42446
Zm00001d050689	-1.60973	3.74469	8.96761	0.0150148	0.0418754	-1.42454
Zm00001d039163	-1.61037	4.43174	17.8515	0.0022007	0.00972384	-1.4251
Zm00001d040379	-1.61067	4.07602	10.2784	0.0106672	0.0321841	-1.42537
Zm00001d045526	-1.61135	4.0531	15.4151	0.00344818	0.0136288	-1.42597
Zm00001d027313	-1.61145	3.89087	12.2337	0.00670229	0.0226474	-1.42607
Zm00001d003229	-1.61151	5.52327	21.2512	0.00125776	0.00637035	-1.42611
Zm00001d020250	-1.61211	5.2081	20.2721	0.00146725	0.00715447	-1.42664
Zm00001d049324	-1.6122	3.51255	10.2971	0.0106171	0.0320602	-1.42672
Zm00001d020757	-1.61258	4.07754	8.16419	0.0187809	0.0497408	-1.42706
Zm00001d030518	-1.61262	3.28211	9.64056	0.0125554	0.0364991	-1.4271
Zm00001d015385	-1.61321	4.30061	13.5472	0.00503209	0.0182099	-1.42762
Zm00001d029235	-1.61326	4.21206	13.1667	0.00545736	0.019355	-1.42766
zma-MIR396a	-1.61355	3.28286	9.47334	0.013117	0.0377033	-1.42792
Zm00001d042714	-1.61382	3.52712	11.5576	0.00782729	0.0254317	-1.42816
Zm00001d042575	-1.61423	5.33307	12.3783	0.00648805	0.0220786	-1.42852
Zm00001d011761	-1.61457	4.33463	16.3755	0.00287304	0.011889	-1.42883
Zm00001d053255	-1.61511	5.66237	19.3273	0.00171131	0.00802186	-1.4293
Zm00001d016563	-1.61518	4.43566	17.6694	0.00227235	0.00996951	-1.42937
Zm00001d029979	-1.61586	3.52882	9.08805	0.0145337	0.0408217	-1.42997
Zm00001d020989	-1.61609	3.54225	10.0726	0.0112355	0.0335266	-1.43017
Zm00001d002454	-1.6171	3.28576	10.2001	0.010879	0.0326847	-1.43107
Zm00001d024544	-1.61774	4.67632	14.1223	0.00446366	0.0165949	-1.43163
Zm00001d010257	-1.61826	4.5203	13.3605	0.0052354	0.0187719	-1.43209
Zm00001d002673	-1.61845	3.71381	11.787	0.00742122	0.0244789	-1.43226
Zm00001d045948	-1.61939	3.72721	13.6561	0.00491789	0.0178777	-1.43309
Zm00001d010567	-1.61944	4.40723	10.8219	0.0093274	0.0290145	-1.43313
Zm00001d052042	-1.6198	3.89767	14.0037	0.00457416	0.0168998	-1.43345
Zm00001d051339	-1.61981	4.79095	9.69443	0.0123808	0.0360773	-1.43346
Zm00001d001532	-1.61982	3.50556	8.30484	0.0180438	0.0482493	-1.43347
Zm00001d021607	-1.62028	3.0079	8.59527	0.0166316	0.0452335	-1.43388
Zm00001d043445	-1.62048	4.58429	12.4218	0.00642538	0.0219256	-1.43405
Zm00001d024717	-1.62128	4.04948	14.707	0.00396439	0.0151342	-1.43476
Zm00001d017151	-1.62133	3.2892	9.95998	0.0115624	0.0342744	-1.43481
Zm00001d052530	-1.62184	3.30362	9.63561	0.0125716	0.0365407	-1.43525
Zm00001d043303	-1.62201	3.52055	11.7623	0.00746371	0.0245812	-1.4354
Zm00001d017089	-1.62262	5.34793	15.7046	0.00326103	0.0130742	-1.43595
Zm00001d048959	-1.62302	4.05088	13.9995	0.00457811	0.0169128	-1.4363
Zm00001d006449	-1.62314	4.54493	16.2283	0.00295307	0.0121457	-1.43641
Zm00001d040743	-1.62329	5.41264	15.174	0.00361412	0.0141222	-1.43654
Zm00001d000934	-1.62331	4.882	13.9577	0.00461789	0.0170356	-1.43656
Zm00001d015948	-1.62332	4.34174	13.1972	0.00542166	0.0192735	-1.43657
Zm00001d005985	-1.62375	5.73367	23.616	0.000884937	0.00490079	-1.43695
Zm00001d037794	-1.62382	3.54853	10.0563	0.0112822	0.0336213	-1.43701
Zm00001d002359	-1.62411	4.73994	19.9467	0.00154619	0.00743196	-1.43726
Zm00001d003217	-1.62411	5.34112	13.2802	0.00532607	0.0190013	-1.43727
Zm00001d026263	-1.62439	3.71865	10.4429	0.0102378	0.0311992	-1.43751
Zm00001d017566	-1.62459	3.71879	9.14419	0.0143159	0.0403345	-1.43769
Zm00001d006736	-1.62497	4.29924	10.2932	0.0106276	0.0320869	-1.43803
Zm00001d041725	-1.625	3.2922	10.4058	0.0103328	0.0314077	-1.43805
Zm00001d021461	-1.62516	4.44376	14.463	0.00416395	0.0157151	-1.4382
Zm00001d003754	-1.62535	3.5365	11.6161	0.00772113	0.0251795	-1.43836
Zm00001d005587	-1.62571	5.60415	23.0413	0.000961465	0.00520237	-1.43868
Zm00001d033438	-1.62598	3.89061	11.3661	0.00818735	0.0263155	-1.43892
Zm00001d050099	-1.62608	3.91494	13.8702	0.00470258	0.0172731	-1.43901
Zm00001d036912	-1.62655	5.38319	22.2015	0.00108841	0.00572225	-1.43942
Zm00001d042723	-1.62685	4.054	12.9378	0.00573447	0.0201028	-1.43969
Zm00001d037841	-1.62756	5.58903	16.6044	0.00275373	0.0115192	-1.44032
Zm00001d052268	-1.62806	4.89521	17.344	0.00240763	0.0104124	-1.44076
Zm00001d018560	-1.62908	4.78336	11.7703	0.00745003	0.0245486	-1.44166
Zm00001d033050	-1.62918	3.89318	11.2745	0.00836671	0.0267579	-1.44175
Zm00001d025146	-1.62951	3.51348	8.76387	0.0158742	0.0436897	-1.44205
Zm00001d022826	-1.62984	3.89373	11.514	0.00790751	0.0256244	-1.44234
Zm00001d033256	-1.62993	4.51947	10.2218	0.0108198	0.0325442	-1.44242
Zm00001d052037	-1.63055	4.22612	8.97766	0.0149739	0.0417881	-1.44296
Zm00001d010612	-1.63063	5.74624	22.2355	0.00108289	0.00569858	-1.44303
Zm00001d020361	-1.63067	3.54086	11.8779	0.00726766	0.0240734	-1.44307
Zm00001d027042	-1.631	3.31108	9.70788	0.0123376	0.0359945	-1.44337
Zm00001d025917	-1.63135	4.45947	14.5261	0.00411124	0.0155597	-1.44367
Zm00001d015220	-1.63226	3.52891	11.8745	0.00727327	0.0240838	-1.44448
Zm00001d022280	-1.6325	3.71268	8.80067	0.0157145	0.0433816	-1.44469
Zm00001d029455	-1.63263	4.22782	8.86259	0.0154504	0.0428032	-1.44481
Zm00001d017135	-1.63274	3.73808	10.5763	0.00990555	0.0304091	-1.4449
Zm00001d043988	-1.63298	4.45012	17.5839	0.00230698	0.0100886	-1.44512
Zm00001d010592	-1.633	4.25086	8.71016	0.0161107	0.0441544	-1.44513
Zm00001d050793	-1.63414	4.92817	20.4551	0.00142503	0.00699218	-1.44614
Zm00001d048446	-1.63418	4.56425	12.4277	0.00641687	0.0219061	-1.44617
Zm00001d053196	-1.63431	5.51608	17.9187	0.00217493	0.00963393	-1.44629
Zm00001d014355	-1.63461	5.09845	17.6188	0.00229276	0.0100387	-1.44655
Zm00001d018983	-1.63478	3.90985	13.6671	0.00490657	0.0178472	-1.44671
Zm00001d033665	-1.63538	3.02016	9.13276	0.0143599	0.0404096	-1.44723
Zm00001d026556	-1.63541	5.05444	19.045	0.0017937	0.00832334	-1.44726
Zm00001d037840	-1.63548	5.59549	16.7612	0.00267554	0.0112769	-1.44733
Zm00001d050694	-1.63672	3.00627	8.21757	0.0184969	0.0491583	-1.44842
Zm00001d023640	-1.63701	4.03895	8.67864	0.0162516	0.0444497	-1.44868
Zm00001d020137	-1.63718	3.74169	13.657	0.00491698	0.0178763	-1.44883
Zm00001d025258	-1.63726	3.7671	10.1603	0.0109889	0.0329263	-1.4489
Zm00001d000992	-1.63752	4.59819	9.32299	0.0136487	0.038849	-1.44913
Zm00001d021955	-1.63783	3.30266	9.53126	0.0129191	0.0372739	-1.44941
Zm00001d034428	-1.63871	4.95067	16.973	0.00257414	0.010939	-1.45018
Zm00001d052726	-1.63916	4.07572	13.7408	0.00483134	0.0176335	-1.45058
Zm00001d046590	-1.63952	4.45544	18.2163	0.00206526	0.00927733	-1.45091
Zm00001d021784	-1.63987	4.42383	10.8587	0.00924443	0.0288171	-1.45121
Zm00001d048982	-1.64032	3.73161	9.98843	0.0114788	0.0340783	-1.45161
Zm00001d029218	-1.64034	3.76961	10.1598	0.0109902	0.0329277	-1.45163
Zm00001d050019	-1.6405	4.48828	13.0153	0.00563878	0.0198545	-1.45177
Zm00001d002418	-1.64061	6.10457	17.5166	0.00233466	0.0101688	-1.45186
Zm00001d017007	-1.64087	3.30514	9.14252	0.0143223	0.0403468	-1.4521
Zm00001d036818	-1.64094	4.71441	9.50927	0.0129938	0.0374398	-1.45216
Zm00001d010171	-1.64104	3.30527	10.6621	0.00969856	0.0299169	-1.45225
Zm00001d035206	-1.64105	6.23839	19.4052	0.00168942	0.00794203	-1.45226
Zm00001d030909	-1.64121	5.29966	12.9415	0.0057298	0.0200936	-1.4524
Zm00001d023642	-1.6414	5.13078	11.5168	0.00790237	0.0256099	-1.45257
Zm00001d004220	-1.6416	4.76398	20.1572	0.00149454	0.00724424	-1.45275
Zm00001d005149	-1.64171	3.77073	9.83081	0.0119519	0.0351185	-1.45284
Zm00001d029810	-1.64222	4.71653	9.36581	0.0134946	0.0385282	-1.45329
Zm00001d041662	-1.64227	4.80919	9.47548	0.0131097	0.0376849	-1.45334
Zm00001d014302	-1.64231	4.37922	10.354	0.0104671	0.0317126	-1.45338
Zm00001d003457	-1.64249	4.89763	13.3546	0.00524205	0.0187838	-1.45353
Zm00001d021950	-1.6425	4.09016	14.926	0.00379522	0.0146433	-1.45354
Zm00001d049975	-1.64272	3.94064	12.7505	0.00597411	0.0207552	-1.45374
Zm00001d001144	-1.64339	4.75559	19.464	0.0016731	0.00788469	-1.45433
Zm00001d020870	-1.6434	5.62595	22.4238	0.00105291	0.00557305	-1.45434
Zm00001d040162	-1.64347	4.248	11.4908	0.00795055	0.025733	-1.4544
Zm00001d022238	-1.64365	4.55126	16.5709	0.00277079	0.0115637	-1.45455
Zm00001d010888	-1.64392	5.73612	21.756	0.00116409	0.00601271	-1.4548
Zm00001d032056	-1.64453	5.1284	18.3074	0.00203307	0.00916849	-1.45534
Zm00001d042568	-1.64461	3.29423	9.00087	0.01488	0.0415735	-1.45541
Zm00001d048801	-1.64498	5.65048	22.622	0.00102244	0.00544072	-1.45573
Zm00001d021874	-1.64591	3.2953	8.86636	0.0154345	0.0427745	-1.45656
Zm00001d006636	-1.64651	4.78769	16.5303	0.00279166	0.0116318	-1.45709
Zm00001d004650	-1.64737	4.76869	20.8586	0.00133705	0.0066752	-1.45785
Zm00001d008035	-1.64758	4.08256	12.7318	0.00599873	0.020811	-1.45804
Zm00001d047858	-1.64781	3.94479	12.4641	0.00636493	0.0217782	-1.45824
Zm00001d038431	-1.64874	4.77968	16.6687	0.00272135	0.0114183	-1.45907
Zm00001d030897	-1.64899	4.36261	16.6986	0.00270642	0.0113825	-1.45928
Zm00001d008151	-1.64927	3.52959	9.11282	0.0144371	0.040594	-1.45953
Zm00001d016773	-1.64982	4.06103	11.452	0.0080234	0.0258949	-1.46002
Zm00001d050572	-1.65019	3.55675	12.4612	0.00636912	0.0217888	-1.46034
Zm00001d017349	-1.6502	3.57002	9.05544	0.0146621	0.0411202	-1.46035
Zm00001d013300	-1.65059	4.24242	11.3439	0.0082303	0.0264231	-1.4607
Zm00001d019358	-1.6508	3.31323	8.59185	0.0166474	0.0452702	-1.46088
Zm00001d000442	-1.65087	6.34128	24.5795	0.000772655	0.00443594	-1.46095
Zm00001d036766	-1.65102	3.94739	12.8983	0.00578404	0.0202439	-1.46108
Zm00001d049009	-1.6511	5.85699	23.5187	0.000897363	0.00494859	-1.46115
Zm00001d020973	-1.65134	3.7406	11.7489	0.0074869	0.02461	-1.46136
Zm00001d042434	-1.65172	3.75353	12.9669	0.0056983	0.0200172	-1.46169
Zm00001d015863	-1.65201	3.53181	8.53963	0.0168913	0.0457995	-1.46196
Zm00001d023575	-1.65249	4.32161	11.3898	0.00814161	0.0261964	-1.46238
Zm00001d051586	-1.65346	4.9046	10.9823	0.00897211	0.0281668	-1.46324
Zm00001d019483	-1.65371	3.32959	10.3864	0.010383	0.0315235	-1.46346
Zm00001d024408	-1.65404	3.74281	10.3986	0.0103514	0.0314595	-1.46375
Zm00001d014968	-1.65455	5.07897	20.2282	0.00147761	0.00718976	-1.4642
Zm00001d043678	-1.65553	4.46847	18.5939	0.00193571	0.0088229	-1.46507
Zm00001d050969	-1.65601	3.73185	8.65334	0.0163658	0.0446876	-1.4655
Zm00001d024680	-1.65674	4.34696	17.5418	0.00232425	0.010138	-1.46614
Zm00001d014696	-1.65705	3.56233	10.8682	0.00922311	0.0287862	-1.46642
Zm00001d040178	-1.65821	4.68906	9.58659	0.0127334	0.0368877	-1.46744
Zm00001d012882	-1.65828	4.10299	11.1921	0.00853213	0.0271692	-1.4675
Zm00001d004172	-1.65849	5.57892	14.0834	0.00449959	0.016692	-1.46769
Zm00001d016896	-1.65903	4.20403	11.8758	0.00727104	0.0240784	-1.46817
Zm00001d016897	-1.65903	4.20403	11.8758	0.00727104	0.0240784	-1.46817
Zm00001d032972	-1.6594	5.37147	21.3829	0.00123245	0.00627292	-1.46849
Zm00001d035700	-1.66003	3.55153	9.61944	0.0126246	0.0366624	-1.46905
Zm00001d002616	-1.66006	5.47106	23.3689	0.000916888	0.00502531	-1.46908
Zm00001d023752	-1.66032	3.9428	14.3453	0.00426468	0.0160165	-1.46931
Zm00001d039912	-1.66049	3.53875	9.2485	0.0139219	0.0394774	-1.46946
Zm00001d050484	-1.66062	3.56524	12.1442	0.00683923	0.0230028	-1.46957
Zm00001d014235	-1.66075	3.56537	12.0212	0.00703311	0.0234973	-1.46969
Zm00001d021084	-1.66079	5.54064	16.0539	0.00305155	0.0124499	-1.46973
zma-MIR164e	-1.66081	3.3214	10.9917	0.00895181	0.0281301	-1.46974
Zm00001d039987	-1.66127	5.2225	21.8392	0.00114947	0.00595291	-1.47015
Zm00001d026079	-1.66131	3.73615	8.7838	0.0157875	0.0435216	-1.47019
Zm00001d032054	-1.66133	3.32183	11.1853	0.00854595	0.0271973	-1.4702
Zm00001d037730	-1.66156	5.05784	13.0018	0.00565527	0.0199036	-1.47041
Zm00001d015556	-1.66172	4.09408	16.1153	0.00301643	0.0123445	-1.47055
Zm00001d029285	-1.66181	5.09372	12.5678	0.00621997	0.0213932	-1.47062
Zm00001d011636	-1.66213	4.07105	12.212	0.00673525	0.0227293	-1.47091
Zm00001d019901	-1.6623	3.30868	9.07727	0.014576	0.0409269	-1.47106
Zm00001d022472	-1.66237	3.74961	12.6594	0.00609526	0.0210557	-1.47112
Zm00001d025740	-1.66524	4.81825	9.93752	0.011629	0.0344199	-1.47366
Zm00001d022078	-1.66533	5.27712	13.3841	0.00520924	0.0186983	-1.47374
Zm00001d013109	-1.66573	4.95392	22.1713	0.00109335	0.00574129	-1.47409
Zm00001d029980	-1.66578	5.3521	23.492	0.000900797	0.00496333	-1.47414
Zm00001d030997	-1.66608	5.32777	16.5728	0.00276984	0.0115635	-1.47441
Zm00001d013894	-1.66659	4.35498	17.8623	0.00219653	0.00970871	-1.47486
Zm00001d014244	-1.66666	3.0457	8.70232	0.0161456	0.0442284	-1.47492
Zm00001d043489	-1.6671	3.94836	9.52513	0.0129398	0.0373146	-1.47531
Zm00001d009510	-1.66766	6.03964	22.8384	0.000990397	0.00531481	-1.47581
Zm00001d031063	-1.66853	4.23436	17.136	0.00249928	0.0107074	-1.47657
Zm00001d005156	-1.66929	4.10026	17.0757	0.00252669	0.0107948	-1.47725
Zm00001d050201	-1.66934	3.93803	14.713	0.00395966	0.0151206	-1.47729
Zm00001d019219	-1.66959	5.52179	17.9727	0.00215453	0.00956694	-1.47751
Zm00001d022835	-1.66964	3.7935	8.99096	0.01492	0.0416566	-1.47756
Zm00001d014413	-1.66975	4.45875	12.8735	0.00581545	0.0203247	-1.47765
Zm00001d012758	-1.67011	3.57299	12.1636	0.00680937	0.022928	-1.47798
Zm00001d012050	-1.67075	3.76907	13.1076	0.00552726	0.0195533	-1.47854
Zm00001d006860	-1.67075	4.07808	11.7174	0.00754169	0.0247443	-1.47854
Zm00001d023097	-1.67144	3.78226	13.2658	0.00534251	0.0190392	-1.47915
Zm00001d018134	-1.6716	4.8426	14.8	0.00389143	0.014911	-1.47929
Zm00001d047666	-1.67176	3.04979	8.53325	0.0169214	0.0458622	-1.47943
Zm00001d000763	-1.67222	5.93463	14.0622	0.00451924	0.0167491	-1.47984
Zm00001d042464	-1.67236	4.80876	17.5776	0.00230953	0.0100946	-1.47997
Zm00001d048171	-1.67252	3.94062	11.8782	0.00726713	0.0240734	-1.48011
Zm00001d024342	-1.67291	3.03582	8.22176	0.0184748	0.0491196	-1.48045
Zm00001d049999	-1.67302	3.03595	8.72724	0.0160351	0.0439933	-1.48055
Zm00001d012941	-1.67309	4.38225	16.3671	0.00287754	0.0119039	-1.48061
Zm00001d001557	-1.67328	3.92915	10.6907	0.00963097	0.0297647	-1.48078
Zm00001d053079	-1.67336	4.2383	14.3724	0.00424123	0.0159407	-1.48085
Zm00001d036865	-1.67368	3.74627	9.27038	0.0138409	0.0392905	-1.48113
Zm00001d025262	-1.67385	4.88276	21.189	0.00126993	0.00641456	-1.48128
Zm00001d030116	-1.67434	3.56321	9.90913	0.0117139	0.0345978	-1.48172
Zm00001d003031	-1.67475	3.75971	10.8798	0.00919709	0.0287164	-1.48208
Zm00001d006028	-1.67581	3.96758	11.8735	0.00727494	0.0240865	-1.48301
Zm00001d022228	-1.67587	6.77857	18.2124	0.00206668	0.00928112	-1.48307
Zm00001d002378	-1.67648	3.34815	9.54299	0.0128794	0.0371994	-1.48361
Zm00001d044330	-1.67698	4.47529	16.8112	0.00265116	0.011197	-1.48405
Zm00001d006836	-1.67701	4.38546	15.2985	0.00352721	0.0138741	-1.48408
Zm00001d033430	-1.67707	3.76161	12.6217	0.00614621	0.0212042	-1.48413
Zm00001d010957	-1.67744	5.44073	23.739	0.000869537	0.0048443	-1.48446
Zm00001d032745	-1.67746	4.40786	11.12	0.00868024	0.0275043	-1.48448
Zm00001d021251	-1.6775	3.93257	12.9938	0.00566506	0.0199309	-1.48452
Zm00001d048063	-1.67762	4.68469	18.9663	0.00181756	0.0084117	-1.48462
Zm00001d002014	-1.67843	3.75014	9.36454	0.0134991	0.0385355	-1.48534
Zm00001d034336	-1.67861	5.66332	19.3434	0.00170676	0.00800417	-1.4855
Zm00001d006924	-1.67882	3.56691	11.3968	0.00812824	0.0261642	-1.48569
Zm00001d006923	-1.67882	3.56691	11.3968	0.00812824	0.0261642	-1.48569
Zm00001d046941	-1.67899	4.56974	10.6296	0.00977647	0.0301026	-1.48584
Zm00001d028808	-1.67903	4.69589	19.4346	0.00168122	0.00791189	-1.48586
Zm00001d007018	-1.67928	3.04109	8.7624	0.0158806	0.0437012	-1.48609
Zm00001d023401	-1.67932	6.27629	13.1773	0.00544488	0.019323	-1.48612
Zm00001d040442	-1.67935	4.37636	16.1987	0.00296951	0.0121941	-1.48615
Zm00001d041632	-1.67945	3.56739	9.45923	0.0131659	0.0378226	-1.48624
Zm00001d025360	-1.67946	3.32271	9.33097	0.0136198	0.0387978	-1.48625
Zm00001d047130	-1.67958	3.55433	9.34657	0.0135636	0.0386743	-1.48635
Zm00001d007021	-1.67965	4.76552	15.2454	0.00356397	0.0139807	-1.48642
Zm00001d043253	-1.67991	5.65708	17.8626	0.00219642	0.00970871	-1.48664
Zm00001d021395	-1.68003	3.76403	12.4998	0.00631457	0.0216476	-1.48676
Zm00001d008924	-1.6809	4.46784	13.9045	0.00466922	0.0171699	-1.48753
Zm00001d048874	-1.68109	5.56189	21.996	0.00112254	0.00584905	-1.48769
Zm00001d010119	-1.6813	4.87923	19.4482	0.00167744	0.00790077	-1.48788
Zm00001d035030	-1.68214	4.88953	20.6992	0.00137099	0.00680037	-1.48862
Zm00001d030157	-1.6827	3.57006	12.492	0.0063256	0.0216759	-1.48912
Zm00001d013451	-1.68272	3.05882	9.2744	0.0138262	0.0392587	-1.48913
Zm00001d052003	-1.68278	4.6788	16.9035	0.00260689	0.011053	-1.48919
Zm00001d010299	-1.68299	3.9613	11.9912	0.00708142	0.0236063	-1.48937
Zm00001d005217	-1.68366	4.75897	11.9531	0.00714334	0.0237521	-1.48996
Zm00001d010702	-1.68436	3.57141	11.9358	0.00717171	0.0238261	-1.49058
Zm00001d033531	-1.68437	4.40247	14.9405	0.00378429	0.0146092	-1.49059
Zm00001d030343	-1.68544	4.57497	14.1751	0.00441555	0.0164567	-1.49154
Zm00001d044239	-1.68579	4.81972	17.9199	0.00217449	0.00963305	-1.49185
Zm00001d051896	-1.68583	3.92729	9.4289	0.0132715	0.0380299	-1.49189
Zm00001d002026	-1.68607	4.2941	9.19719	0.014114	0.0398777	-1.49209
Zm00001d052320	-1.68657	4.37128	18.1651	0.00208367	0.00933857	-1.49254
Zm00001d009948	-1.68739	3.3292	9.38177	0.0134377	0.0384078	-1.49326
Zm00001d042800	-1.68748	3.04779	8.69101	0.0161962	0.0443327	-1.49335
Zm00001d008343	-1.68782	3.941	12.2389	0.00669452	0.0226348	-1.49364
Zm00001d049351	-1.68805	3.758	9.66168	0.0124866	0.0363362	-1.49385
Zm00001d048944	-1.68831	4.37269	17.4215	0.00237452	0.0103102	-1.49408
Zm00001d036463	-1.68836	4.38372	17.3044	0.00242476	0.0104657	-1.49412
Zm00001d014364	-1.68849	4.26197	16.8689	0.00262336	0.0111084	-1.49424
Zm00001d003649	-1.68895	5.32199	24.1233	0.000823502	0.00465545	-1.49465
Zm00001d006045	-1.68909	4.1164	17.2905	0.0024308	0.0104827	-1.49477
Zm00001d007468	-1.69017	4.11729	16.4345	0.00284169	0.0117859	-1.49573
Zm00001d023791	-1.69059	6.19459	23.0031	0.000966823	0.00522196	-1.49609
Zm00001d029627	-1.69059	3.05031	8.23325	0.0184144	0.0490125	-1.4961
Zm00001d006208	-1.69101	3.6033	10.9643	0.00901113	0.0282734	-1.49647
Zm00001d053655	-1.69115	3.0508	8.58486	0.0166798	0.0453425	-1.49659
Zm00001d020128	-1.69129	5.11786	23.5055	0.000899062	0.00495726	-1.49672
Zm00001d038392	-1.69155	4.38631	19.4955	0.00166442	0.007847	-1.49694
Zm00001d009539	-1.69159	3.34655	10.3559	0.0104622	0.0317052	-1.49698
Zm00001d024857	-1.69171	3.98057	13.7047	0.00486797	0.0177373	-1.49709
Zm00001d026546	-1.69176	5.50891	15.7756	0.00321705	0.0129496	-1.49713
Zm00001d048159	-1.69197	3.59083	12.2056	0.00674496	0.0227562	-1.49732
Zm00001d037981	-1.69238	3.05181	8.42716	0.0174317	0.0469622	-1.49768
Zm00001d043563	-1.69246	5.47408	11.732	0.00751616	0.0246771	-1.49775
Zm00001d007469	-1.69276	4.1194	16.4538	0.00283152	0.0117508	-1.49802
Zm00001d048061	-1.693	3.36164	10.7896	0.00940093	0.0291944	-1.49823
Zm00001d015061	-1.69306	3.06729	8.98525	0.0149431	0.041717	-1.49828
Zm00001d011380	-1.69316	3.77474	9.38375	0.0134307	0.0383933	-1.49837
Zm00001d047442	-1.69361	3.78774	12.4605	0.00637012	0.0217903	-1.49877
Zm00001d028839	-1.6938	6.78332	11.9142	0.00720723	0.0239224	-1.49894
Zm00001d007635	-1.69381	4.09689	11.6626	0.00763812	0.0249853	-1.49895
Zm00001d034824	-1.69467	4.25568	17.6497	0.00228026	0.00999434	-1.49971
Zm00001d030220	-1.69472	3.56672	9.73108	0.0122637	0.0358268	-1.49975
Zm00001d013378	-1.69496	3.94683	11.029	0.00887178	0.027928	-1.49997
Zm00001d029516	-1.69506	4.81736	8.79667	0.0157318	0.0434109	-1.50005
Zm00001d036032	-1.69533	3.56721	9.44535	0.0132141	0.0379292	-1.50029
Zm00001d030623	-1.69552	3.06928	9.53617	0.0129024	0.0372369	-1.50046
Zm00001d008912	-1.69578	3.59398	8.65049	0.0163787	0.0447134	-1.50069
Zm00001d004561	-1.69598	4.59392	17.5213	0.00233274	0.0101615	-1.50087
Zm00001d014625	-1.69599	3.78965	12.3753	0.00649245	0.0220909	-1.50088
Zm00001d005736	-1.69645	3.60773	10.7676	0.0094516	0.0293192	-1.50128
Zm00001d048562	-1.69676	5.85379	20.165	0.00149268	0.00723879	-1.50156
Zm00001d038252	-1.69694	3.94843	12.0783	0.00694229	0.0232635	-1.50172
Zm00001d012449	-1.69707	4.37982	11.2755	0.00836476	0.0267538	-1.50183
Zm00001d031118	-1.6971	3.81588	10.1883	0.0109114	0.0327468	-1.50186
Zm00001d037679	-1.69742	3.96092	14.8112	0.00388281	0.0148852	-1.50214
Zm00001d001365	-1.69787	3.05629	8.43959	0.0173709	0.0468372	-1.50254
Zm00001d022572	-1.69814	5.4336	19.4036	0.00168986	0.00794203	-1.50278
Zm00001d024525	-1.699	4.14797	12.8847	0.00580117	0.0202893	-1.50354
Zm00001d018112	-1.6992	3.58354	9.71456	0.0123163	0.0359402	-1.50372
Zm00001d035456	-1.69978	4.23725	10.647	0.00973458	0.0299996	-1.50423
Zm00001d049111	-1.6999	3.57096	9.02303	0.014791	0.0413988	-1.50433
Zm00001d044015	-1.69997	4.14875	12.2558	0.00666902	0.0225661	-1.5044
Zm00001d024382	-1.70025	4.12552	17.1626	0.00248733	0.0106733	-1.50465
Zm00001d011545	-1.70051	4.71343	15.0097	0.00373289	0.0144583	-1.50488
Zm00001d025127	-1.70128	4.10299	12.9664	0.0056989	0.0200175	-1.50556
Zm00001d024651	-1.70142	4.2386	11.658	0.00764624	0.0249997	-1.50568
Zm00001d025253	-1.70145	4.69405	17.4667	0.00235549	0.0102447	-1.5057
Zm00001d025564	-1.70156	3.57231	9.78304	0.0121	0.0354396	-1.5058
Zm00001d017800	-1.70186	3.07441	9.43895	0.0132363	0.0379533	-1.50607
Zm00001d000950	-1.70188	4.12685	16.7456	0.00268318	0.0113018	-1.50609
Zm00001d044668	-1.70196	4.25033	13.2303	0.00538321	0.019165	-1.50616
Zm00001d020322	-1.70219	3.58599	10.6633	0.00969587	0.0299109	-1.50636
Zm00001d001468	-1.70235	3.96496	15.3213	0.00351159	0.0138266	-1.5065
Zm00001d002902	-1.7029	4.71541	20.9215	0.00132396	0.00662336	-1.50699
Zm00001d045109	-1.70318	3.77036	8.99106	0.0149196	0.0416566	-1.50724
Zm00001d003117	-1.70329	6.22253	26.6003	0.000588701	0.00362698	-1.50733
Zm00001d032746	-1.70344	3.35624	12.136	0.00685201	0.0230379	-1.50747
Zm00001d021313	-1.70364	3.60038	13.0779	0.00556288	0.0196456	-1.50764
Zm00001d018842	-1.70384	4.11675	11.7668	0.00745595	0.0245628	-1.50782
Zm00001d019329	-1.70394	5.98641	22.3259	0.00106837	0.00563888	-1.50791
Zm00001d041737	-1.70454	3.95465	13.3293	0.00527041	0.0188561	-1.50844
Zm00001d025383	-1.70482	5.52732	18.0811	0.00211426	0.00943888	-1.50869
Zm00001d050147	-1.70501	5.04113	18.5778	0.00194104	0.00883805	-1.50886
Zm00001d001142	-1.70533	5.06901	12.2498	0.00667798	0.0225867	-1.50914
Zm00001d024759	-1.70541	3.96746	16.3014	0.00291302	0.0120163	-1.50921
Zm00001d042197	-1.70554	3.35795	9.5996	0.0126901	0.036787	-1.50933
Zm00001d002933	-1.70585	3.57582	9.91863	0.0116854	0.0345267	-1.5096
Zm00001d029390	-1.70605	3.35837	8.67094	0.0162863	0.044517	-1.50978
Zm00001d037237	-1.70616	4.81665	8.86307	0.0154484	0.0428008	-1.50987
Zm00001d038068	-1.70644	4.63358	19.6621	0.00161951	0.00769194	-1.51013
Zm00001d001439	-1.70644	4.63358	19.6621	0.00161951	0.00769194	-1.51013
Zm00001d034729	-1.70655	3.82359	10.6864	0.00964095	0.0297814	-1.51022
Zm00001d007995	-1.70657	3.37273	11.2376	0.00844023	0.0269358	-1.51024
Zm00001d039016	-1.70662	3.57645	9.95659	0.0115724	0.0342925	-1.51028
Zm00001d033970	-1.70697	3.61631	10.4305	0.0102695	0.0312633	-1.5106
Zm00001d021761	-1.70806	4.09688	9.04962	0.0146851	0.041176	-1.51156
Zm00001d014915	-1.70868	4.97963	23.4401	0.00090754	0.00499134	-1.51211
Zm00001d048746	-1.70896	3.36074	12.2432	0.00668806	0.0226168	-1.51235
Zm00001d028004	-1.70929	3.78793	13.5866	0.00499044	0.0180893	-1.51264
Zm00001d014303	-1.70995	4.43441	11.0926	0.00873736	0.0276147	-1.51323
Zm00001d018036	-1.71119	4.12276	13.1881	0.00543221	0.0192921	-1.51433
Zm00001d053222	-1.71126	4.16974	9.45041	0.0131964	0.0378898	-1.51439
Zm00001d037891	-1.71242	4.15892	12.818	0.00588633	0.0205138	-1.51541
Zm00001d009932	-1.71294	4.48337	10.3469	0.0104857	0.0317615	-1.51588
Zm00001d009802	-1.71301	4.13594	17.4968	0.00234291	0.0101956	-1.51593
Zm00001d049940	-1.71304	3.60808	11.0957	0.00873101	0.0276048	-1.51597
Zm00001d018050	-1.71312	5.8808	23.6607	0.000879312	0.00487828	-1.51603
Zm00001d014019	-1.71391	5.42231	15.758	0.00322791	0.012976	-1.51673
Zm00001d014066	-1.71392	5.60689	22.3897	0.00105827	0.00559386	-1.51674
Zm00001d027709	-1.71394	4.1367	14.2608	0.00433879	0.0162356	-1.51676
Zm00001d052509	-1.71415	4.47375	8.7361	0.015996	0.0439365	-1.51695
Zm00001d003611	-1.71458	3.79225	13.2907	0.00531408	0.0189638	-1.51732
Zm00001d047758	-1.71476	3.805	15.4313	0.00343736	0.0135917	-1.51748
Zm00001d052458	-1.71476	4.01157	9.8614	0.0118582	0.0349063	-1.51749
Zm00001d042555	-1.71512	4.86853	12.7504	0.00597426	0.0207552	-1.51781
Zm00001d004232	-1.71546	3.08554	9.87039	0.0118309	0.0348486	-1.5181
Zm00001d051386	-1.71553	4.91678	19.9059	0.00155644	0.00746747	-1.51817
Zm00001d051018	-1.71647	3.353	9.82011	0.0119849	0.035191	-1.519
Zm00001d038144	-1.71731	4.55096	14.905	0.00381102	0.0146921	-1.51974
Zm00001d046813	-1.71784	3.07264	8.53101	0.016932	0.0458813	-1.52021
Zm00001d046812	-1.71784	3.07264	8.53101	0.016932	0.0458813	-1.52021
Zm00001d039785	-1.71814	4.25225	12.568	0.00621964	0.0213932	-1.52048
Zm00001d046642	-1.71814	3.59905	8.44973	0.0173215	0.0467363	-1.52048
Zm00001d037446	-1.71827	3.82049	13.1236	0.0055082	0.019502	-1.52059
Zm00001d028162	-1.71843	3.83329	10.8549	0.00925277	0.0288328	-1.52074
Zm00001d013584	-1.71872	4.91932	11.3669	0.00818583	0.0263139	-1.52099
Zm00001d013702	-1.71932	4.15282	16.277	0.0029263	0.0120597	-1.52153
Zm00001d009753	-1.7194	5.58087	12.458	0.00637367	0.0217973	-1.52159
Zm00001d033153	-1.72043	3.60093	11.2202	0.00847525	0.0270233	-1.52251
Zm00001d023440	-1.72086	3.79739	13.5765	0.00500105	0.018116	-1.52288
Zm00001d019084	-1.721	5.65233	22.1181	0.00110211	0.00577568	-1.52301
Zm00001d052918	-1.721	4.78945	13.778	0.00479384	0.0175293	-1.52301
Zm00001d047670	-1.72111	3.60149	9.7505	0.0122022	0.0356871	-1.52311
Zm00001d039638	-1.72161	3.62828	10.1652	0.0109753	0.0328931	-1.52355
Zm00001d032405	-1.72164	3.07575	9.03586	0.0147398	0.0412849	-1.52358
Zm00001d037729	-1.72179	4.59428	11.7796	0.00743393	0.024512	-1.5237
Zm00001d019536	-1.72216	4.42232	18.2082	0.00206816	0.00928501	-1.52403
Zm00001d041041	-1.72217	4.00544	13.4137	0.00517652	0.0186138	-1.52404
Zm00001d026296	-1.72223	3.79852	13.4695	0.00511547	0.0184451	-1.5241
Zm00001d048683	-1.72232	4.24441	9.50694	0.0130017	0.03746	-1.52418
Zm00001d041575	-1.72387	5.59994	14.62	0.00403417	0.0153422	-1.52555
Zm00001d022886	-1.72398	4.15663	15.2335	0.0035723	0.0140022	-1.52565
Zm00001d016694	-1.72415	4.65846	17.1113	0.00251045	0.0107384	-1.52579
Zm00001d038521	-1.72432	3.59094	10.138	0.011051	0.0330895	-1.52595
Zm00001d012450	-1.72484	5.08479	13.998	0.00457958	0.016915	-1.5264
Zm00001d050265	-1.72511	5.22925	18.5676	0.00194442	0.00885017	-1.52664
Zm00001d031002	-1.72541	3.60497	11.3787	0.00816308	0.0262547	-1.52691
Zm00001d017119	-1.72588	4.26988	15.0047	0.00373656	0.0144706	-1.52733
Zm00001d018709	-1.72593	3.98422	12.7846	0.00592962	0.0206371	-1.52737
Zm00001d006037	-1.72604	3.6055	13.4231	0.00516611	0.0185849	-1.52747
Zm00001d031700	-1.72604	3.6055	12.2404	0.00669222	0.022629	-1.52747
Zm00001d047400	-1.72609	3.9602	9.54592	0.0128695	0.0371866	-1.52752
Zm00001d028720	-1.72648	3.83987	10.1714	0.0109581	0.0328568	-1.52786
Zm00001d014785	-1.72652	3.09462	10.1322	0.011067	0.03313	-1.52789
Zm00001d011302	-1.72655	4.4259	15.7353	0.00324195	0.0130217	-1.52792
Zm00001d009084	-1.72706	3.61952	13.2965	0.00530752	0.0189502	-1.52837
Zm00001d037777	-1.72726	4.9574	12.3833	0.00648085	0.0220611	-1.52855
Zm00001d044742	-1.72756	4.74571	11.4983	0.00793671	0.0257003	-1.52881
Zm00001d009391	-1.72855	4.29468	11.0572	0.00881181	0.0278019	-1.52969
Zm00001d005715	-1.72892	4.72657	20.2035	0.00148348	0.0072086	-1.53001
Zm00001d018333	-1.72958	4.26161	9.00485	0.014864	0.0415429	-1.5306
Zm00001d047251	-1.7298	4.17313	8.94555	0.015105	0.042055	-1.53079
Zm00001d017200	-1.72989	5.42732	13.3136	0.00528812	0.0189014	-1.53088
Zm00001d006888	-1.73043	4.42908	18.7354	0.00188974	0.00866391	-1.53135
Zm00001d018595	-1.73055	3.6092	13.5366	0.0050433	0.0182364	-1.53146
Zm00001d023651	-1.7315	4.25191	9.52431	0.0129426	0.0373198	-1.5323
Zm00001d040188	-1.73288	4.53163	12.7936	0.00591792	0.0206	-1.53352
Zm00001d007585	-1.73307	4.14064	16.19	0.00297439	0.0122115	-1.53369
Zm00001d022435	-1.73363	4.67669	13.3601	0.00523585	0.0187719	-1.53419
Zm00001d011374	-1.73388	3.99074	16.4123	0.00285345	0.0118242	-1.53441
Zm00001d009600	-1.73389	5.11685	12.4423	0.00639601	0.0218524	-1.53442
Zm00001d009403	-1.73456	5.37619	21.5034	0.00120985	0.00618736	-1.53501
Zm00001d022720	-1.73471	4.51179	10.6027	0.00984121	0.0302623	-1.53514
Zm00001d009926	-1.73485	5.05642	19.1275	0.00176915	0.00823599	-1.53526
Zm00001d037892	-1.73495	4.32267	12.8913	0.00579289	0.0202676	-1.53536
Zm00001d052520	-1.73497	5.40049	23.0904	0.000954621	0.00517625	-1.53537
Zm00001d027063	-1.73535	3.82184	14.864	0.00384217	0.0147653	-1.53571
Zm00001d009661	-1.73536	3.82185	14.9013	0.00381381	0.0146983	-1.53572
Zm00001d015940	-1.7357	4.52327	17.2608	0.0024438	0.0105177	-1.53602
Zm00001d039182	-1.7357	4.92376	22.8078	0.000994851	0.00533213	-1.53602
Zm00001d035980	-1.73575	3.08727	9.16993	0.0142175	0.0401195	-1.53606
Zm00001d022636	-1.73612	5.67969	22.5316	0.0010362	0.0054995	-1.53639
Zm00001d027467	-1.73628	4.41188	18.6499	0.00191736	0.00876077	-1.53653
Zm00001d038388	-1.73632	4.54512	17.8272	0.00221007	0.00975776	-1.53657
Zm00001d033207	-1.73644	3.79757	8.80916	0.015678	0.043299	-1.53667
Zm00001d034091	-1.73683	3.79791	8.75793	0.0159001	0.0437488	-1.53702
Zm00001d000406	-1.73752	5.18682	12.5727	0.0062132	0.0213806	-1.53763
Zm00001d035505	-1.73791	4.31371	16.6019	0.002755	0.0115212	-1.53797
Zm00001d004684	-1.73912	5.3631	24.708	0.000759033	0.00437893	-1.53904
Zm00001d027429	-1.73916	5.65977	18.1088	0.0021041	0.00940535	-1.53908
Zm00001d021087	-1.7397	3.99549	15.1246	0.00364934	0.0142247	-1.53955
Zm00001d051389	-1.73994	4.89835	13.9871	0.00458993	0.0169479	-1.53977
Zm00001d048239	-1.74008	4.98657	19.573	0.00164335	0.00777582	-1.53989
Zm00001d002526	-1.74059	4.74624	22.7315	0.00100607	0.00537899	-1.54034
Zm00001d024889	-1.74072	4.45958	12.2631	0.00665814	0.022543	-1.54046
Zm00001d051308	-1.74086	3.81374	12.7624	0.00595864	0.0207234	-1.54058
Zm00001d015571	-1.74129	4.14737	17.0382	0.00254386	0.0108492	-1.54097
Zm00001d008019	-1.74141	4.8996	17.0969	0.002517	0.0107617	-1.54107
Zm00001d001916	-1.74172	4.27154	13.4372	0.00515071	0.0185414	-1.54135
Zm00001d011003	-1.74254	4.00995	15.3554	0.00348836	0.0137489	-1.54207
Zm00001d000658	-1.74261	5.18222	11.8458	0.00732138	0.0242144	-1.54213
Zm00001d010402	-1.74288	5.23502	23.5819	0.000889271	0.00491919	-1.54237
Zm00001d018235	-1.7435	3.40292	10.3198	0.010557	0.0319182	-1.54292
Zm00001d046553	-1.74394	4.17295	15.726	0.0032477	0.0130381	-1.54331
Zm00001d042293	-1.74399	3.37555	10.0912	0.0111828	0.0334008	-1.54336
Zm00001d021744	-1.74404	4.42925	15.0146	0.00372927	0.0144481	-1.5434
Zm00001d052489	-1.74426	3.99923	15.9038	0.00313949	0.0127262	-1.54359
Zm00001d052147	-1.74506	3.3903	12.7576	0.00596481	0.0207356	-1.5443
Zm00001d004389	-1.74534	3.37665	8.72428	0.0160482	0.0440168	-1.54455
Zm00001d003396	-1.74571	4.33148	13.3183	0.00528275	0.0188916	-1.54488
Zm00001d030817	-1.74609	3.62191	13.0736	0.00556802	0.0196602	-1.54521
Zm00001d015635	-1.74633	4.16319	17.3112	0.0024218	0.0104581	-1.54542
Zm00001d051785	-1.74676	3.11119	10.3447	0.0104915	0.0317718	-1.54581
Zm00001d008161	-1.74738	4.16405	18.3336	0.00202391	0.00913781	-1.54635
Zm00001d004176	-1.74775	4.26519	9.24048	0.0139517	0.0395447	-1.54668
Zm00001d034996	-1.74831	3.39295	11.9853	0.00709102	0.0236322	-1.54718
Zm00001d013422	-1.74836	5.78612	19.2198	0.00174214	0.00813303	-1.54722
Zm00001d001182	-1.74877	4.84178	9.79404	0.0120657	0.0353778	-1.54758
Zm00001d031937	-1.74886	4.61643	12.1554	0.00682196	0.0229546	-1.54767
Zm00001d018191	-1.74913	3.83312	15.9729	0.0030986	0.0126007	-1.5479
Zm00001d021035	-1.74917	4.01537	10.0289	0.0113609	0.0338054	-1.54793
Zm00001d013501	-1.74957	4.88709	10.7923	0.00939468	0.0291797	-1.54829
Zm00001d013590	-1.751	5.4711	15.5645	0.00335002	0.0133434	-1.54955
Zm00001d012216	-1.7515	4.32483	16.1206	0.00301343	0.0123369	-1.55
Zm00001d005687	-1.75194	3.10059	9.65028	0.0125236	0.0364231	-1.55039
Zm00001d000501	-1.75244	4.74585	20.359	0.00144702	0.00707702	-1.55083
Zm00001d051135	-1.7528	4.1568	15.8525	0.00317025	0.012814	-1.55115
Zm00001d017393	-1.75328	4.3036	19.1764	0.00175477	0.00818125	-1.55157
Zm00001d018085	-1.75352	3.11675	8.69603	0.0161737	0.0442837	-1.55179
Zm00001d010294	-1.75363	5.05404	16.7927	0.00266014	0.0112236	-1.55188
Zm00001d048875	-1.75388	5.39203	21.9351	0.00113291	0.00588816	-1.5521
Zm00001d009620	-1.75391	3.82444	11.2969	0.00832232	0.0266639	-1.55213
Zm00001d002373	-1.75397	3.39759	11.5654	0.00781309	0.0254005	-1.55219
Zm00001d051825	-1.75406	5.89521	27.2289	0.000542722	0.0034057	-1.55227
Zm00001d014491	-1.75416	5.03573	20.0732	0.00151489	0.00731658	-1.55235
Zm00001d010628	-1.75419	4.61048	8.84713	0.0155159	0.04293	-1.55238
Zm00001d043181	-1.75494	4.74789	21.4873	0.00121284	0.00619384	-1.55304
Zm00001d021912	-1.75511	3.11799	10.2889	0.0106391	0.0321117	-1.55319
Zm00001d029352	-1.75566	4.04503	10.4326	0.0102641	0.031255	-1.55368
Zm00001d010576	-1.75588	4.18273	14.3776	0.0042367	0.0159274	-1.55387
Zm00001d014085	-1.75676	5.30058	21.3206	0.00124435	0.0063229	-1.55466
Zm00001d020752	-1.75678	4.8286	14.6881	0.00397948	0.0151827	-1.55467
Zm00001d033602	-1.75782	4.30731	18.8622	0.00184966	0.00852414	-1.55559
Zm00001d021661	-1.75801	4.55218	13.8466	0.00472574	0.0173338	-1.55576
Zm00001d018935	-1.75854	4.66583	22.0044	0.00112112	0.00584257	-1.55623
Zm00001d024883	-1.75856	4.718	9.02877	0.0147681	0.0413553	-1.55624
Zm00001d013896	-1.75888	4.02333	14.5077	0.00412653	0.0156025	-1.55653
Zm00001d009351	-1.75909	4.30835	16.7156	0.00269799	0.0113556	-1.55672
Zm00001d028633	-1.75923	6.22981	18.9102	0.00183476	0.00846745	-1.55684
Zm00001d039935	-1.75933	3.10662	9.14074	0.0143292	0.0403544	-1.55693
Zm00001d044310	-1.75948	4.4199	15.8622	0.0031644	0.0127943	-1.55706
Zm00001d022071	-1.75981	3.10704	9.40522	0.0133547	0.038218	-1.55735
Zm00001d046068	-1.75991	4.75194	20.4234	0.00143224	0.00702054	-1.55745
Zm00001d002369	-1.76081	4.01278	17.1857	0.00247703	0.0106349	-1.55824
zma-MIR156a	-1.76113	4.32136	17.9372	0.00216792	0.00960938	-1.55853
Zm00001d041734	-1.76124	3.83045	14.4662	0.00416127	0.0157065	-1.55862
Zm00001d017882	-1.76169	3.39006	9.89929	0.0117434	0.0346563	-1.55902
Zm00001d020900	-1.76181	3.98944	10.2198	0.0108253	0.0325532	-1.55912
Zm00001d041740	-1.76183	4.67898	14.306	0.00429891	0.0161157	-1.55914
Zm00001d040745	-1.76186	4.75358	21.6826	0.00117715	0.00606184	-1.55917
Zm00001d028923	-1.76203	4.63752	12.9124	0.0057663	0.0201979	-1.55932
Zm00001d047800	-1.76228	3.81875	10.4395	0.0102465	0.0312184	-1.55954
Zm00001d038695	-1.76255	3.81897	10.0979	0.0111637	0.0333633	-1.55978
Zm00001d010493	-1.76261	5.24249	22.658	0.00101702	0.00541992	-1.55983
Zm00001d021085	-1.76297	5.6243	18.4969	0.00196804	0.00893435	-1.56015
Zm00001d016792	-1.7648	3.63725	14.2886	0.00431416	0.016162	-1.56177
Zm00001d008144	-1.76501	3.40664	12.4545	0.00637856	0.0218077	-1.56195
Zm00001d038860	-1.76524	4.56882	20.8102	0.00134726	0.00671365	-1.56216
Zm00001d007044	-1.76581	5.80786	23.578	0.000889769	0.00491919	-1.56266
Zm00001d001480	-1.76621	4.81661	11.6254	0.00770457	0.0251501	-1.56302
Zm00001d005277	-1.76657	5.93153	27.5945	0.000517991	0.00328422	-1.56333
Zm00001d016363	-1.76679	5.03665	24.9158	0.000737614	0.00428607	-1.56353
Zm00001d053676	-1.76682	3.66527	12.116	0.00688318	0.0231037	-1.56356
Zm00001d032754	-1.76707	3.63911	11.9842	0.00709272	0.0236339	-1.56378
Zm00001d014169	-1.76727	4.05454	10.9505	0.00904115	0.0283403	-1.56395
Zm00001d032535	-1.76775	3.11351	9.54305	0.0128792	0.0371994	-1.56438
Zm00001d039493	-1.76811	4.56042	9.9715	0.0115285	0.0341999	-1.5647
Zm00001d011012	-1.76823	4.52859	12.6603	0.00609397	0.0210555	-1.5648
Zm00001d000839	-1.76897	4.664	22.236	0.00108281	0.00569858	-1.56546
Zm00001d036936	-1.7693	4.17031	17.9253	0.00217244	0.00962505	-1.56575
Zm00001d032430	-1.76937	4.70596	13.8104	0.00476158	0.0174391	-1.56582
Zm00001d023498	-1.76963	4.18228	18.9375	0.00182635	0.00843758	-1.56604
Zm00001d050323	-1.76971	5.06727	16.86	0.00262762	0.011124	-1.56611
Zm00001d031013	-1.76979	4.45034	18.4745	0.00197559	0.00896074	-1.56619
Zm00001d039301	-1.76999	4.73999	10.0561	0.0112827	0.0336213	-1.56636
Zm00001d025531	-1.77074	3.85082	14.4095	0.00420938	0.0158474	-1.56702
Zm00001d012668	-1.77076	5.0681	14.0892	0.00449416	0.0166782	-1.56705
Zm00001d013960	-1.77096	3.11622	8.62315	0.0165033	0.0449847	-1.56722
Zm00001d015252	-1.771	4.95272	19.9071	0.00155615	0.00746747	-1.56726
Zm00001d038865	-1.77125	4.78154	21.4543	0.00121901	0.00621839	-1.56748
Zm00001d027982	-1.77135	3.86394	12.7928	0.00591896	0.0206018	-1.56757
Zm00001d005698	-1.77148	4.20727	14.6365	0.00402087	0.015305	-1.56769
Zm00001d024183	-1.77165	4.00957	14.3873	0.00422842	0.0159017	-1.56783
Zm00001d015990	-1.77181	3.85171	15.571	0.00334578	0.0133333	-1.56798
Zm00001d047577	-1.77207	3.65637	14.8639	0.0038423	0.0147653	-1.5682
Zm00001d002608	-1.7721	2.75764	8.65395	0.016363	0.0446855	-1.56823
Zm00001d033775	-1.77215	3.63014	10.535	0.010007	0.0306491	-1.56827
Zm00001d014038	-1.77226	4.87081	24.2368	0.000810478	0.00459746	-1.56837
Zm00001d012562	-1.77235	4.64597	11.3377	0.00824234	0.0264553	-1.56845
Zm00001d029587	-1.77238	5.25928	24.4353	0.0007883	0.00450217	-1.56848
Zm00001d034681	-1.77244	5.2113	21.7347	0.00116786	0.0060266	-1.56854
Zm00001d030944	-1.77306	5.75548	25.5877	0.000673251	0.00400739	-1.56908
Zm00001d052098	-1.77351	4.46438	18.9516	0.00182203	0.00842357	-1.56948
Zm00001d016200	-1.77359	3.13312	10.7007	0.00960738	0.0297059	-1.56955
Zm00001d004896	-1.77366	5.17649	18.7177	0.00189543	0.00868491	-1.56961
Zm00001d006447	-1.77367	5.07999	14.8155	0.00387948	0.0148796	-1.56962
Zm00001d051824	-1.77408	5.01444	19.9829	0.00153716	0.00739857	-1.56999
Zm00001d048633	-1.77409	3.11873	9.8931	0.0117621	0.0347036	-1.57
Zm00001d005863	-1.77424	3.63186	10.2166	0.0108341	0.0325747	-1.57012
Zm00001d015639	-1.77455	4.19803	17.5641	0.00231507	0.0101116	-1.5704
Zm00001d044425	-1.77474	4.52333	9.23569	0.0139696	0.0395781	-1.57056
Zm00001d024970	-1.77593	4.32218	18.2007	0.00207087	0.0092929	-1.57162
Zm00001d027577	-1.77636	4.55662	12.0215	0.00703259	0.0234973	-1.572
Zm00001d010946	-1.77687	4.17652	16.8493	0.00263276	0.0111422	-1.57245
Zm00001d040677	-1.7769	3.13589	8.32715	0.0179302	0.0480374	-1.57248
Zm00001d048635	-1.77691	4.56772	11.2015	0.00851318	0.0271199	-1.57249
Zm00001d040803	-1.77696	5.08266	14.5173	0.00411852	0.0155782	-1.57253
Zm00001d007358	-1.77697	3.67358	9.30611	0.01371	0.0389839	-1.57254
Zm00001d044933	-1.77706	4.55712	18.9382	0.00182614	0.00843758	-1.57262
Zm00001d038946	-1.77781	4.9487	22.0859	0.00110746	0.00579351	-1.57329
Zm00001d042538	-1.7781	3.86947	14.7794	0.00390751	0.0149653	-1.57354
Zm00001d050329	-1.77815	3.40357	9.6118	0.0126498	0.0367114	-1.57359
Zm00001d028427	-1.77841	4.89566	18.7197	0.00189479	0.00868402	-1.57382
Zm00001d008645	-1.77859	5.16244	14.3875	0.00422821	0.0159017	-1.57397
Zm00001d024905	-1.77873	3.66183	10.7601	0.0094689	0.0293566	-1.5741
Zm00001d009271	-1.77892	2.76318	8.52926	0.0169402	0.0458914	-1.57427
Zm00001d021180	-1.77992	3.12352	10.1916	0.0109024	0.0327276	-1.57515
Zm00001d018494	-1.77996	5.20846	20.1499	0.00149631	0.00724668	-1.57518
Zm00001d018219	-1.78051	5.27468	24.4127	0.000790785	0.00451287	-1.57567
Zm00001d002371	-1.78051	3.88409	11.475	0.00798018	0.0257979	-1.57568
Zm00001d042437	-1.78069	4.59217	18.0302	0.00213305	0.00949246	-1.57584
Zm00001d028881	-1.7808	4.89758	18.9558	0.00182075	0.00842066	-1.57593
Zm00001d015796	-1.78083	4.33753	19.9312	0.00155007	0.00744596	-1.57596
Zm00001d033549	-1.78148	5.35596	17.0211	0.00255175	0.0108675	-1.57653
Zm00001d037677	-1.7819	4.58246	20.7722	0.00135532	0.00674147	-1.5769
zma-MIR172d	-1.78225	3.43466	11.9439	0.00715842	0.0237888	-1.57721
Zm00001d024732	-1.78229	3.65158	13.6763	0.00489713	0.0178237	-1.57724
Zm00001d053322	-1.78245	3.12556	8.62105	0.016513	0.0450046	-1.57739
Zm00001d039200	-1.7829	3.12598	9.62262	0.0126142	0.0366402	-1.57779
Zm00001d008906	-1.78313	5.17518	19.6101	0.00163337	0.00774416	-1.57799
Zm00001d034669	-1.78327	4.33953	17.0371	0.00254437	0.0108493	-1.57812
Zm00001d046154	-1.78347	4.71758	15.0498	0.00370343	0.0143793	-1.5783
Zm00001d004578	-1.78347	3.66572	14.8029	0.00388923	0.0149053	-1.5783
Zm00001d005472	-1.78406	3.14171	10.8584	0.0092451	0.0288171	-1.57881
Zm00001d002302	-1.78419	3.6663	12.513	0.00629611	0.0215976	-1.57893
Zm00001d002874	-1.78453	4.4514	17.3547	0.00240303	0.0103982	-1.57923
Zm00001d003915	-1.78589	4.8919	22.9139	0.000979507	0.00527228	-1.58044
Zm00001d041862	-1.78592	3.65456	12.4463	0.00639031	0.0218403	-1.58046
Zm00001d013716	-1.7862	4.31927	17.4109	0.00237904	0.0103264	-1.58071
Zm00001d011716	-1.78662	4.47511	14.0396	0.00454036	0.0168066	-1.58108
Zm00001d024473	-1.78701	3.42468	12.0853	0.00693133	0.0232355	-1.58143
Zm00001d000835	-1.78748	3.87716	14.6283	0.00402747	0.0153242	-1.58184
Zm00001d011392	-1.78751	3.14457	10.8968	0.00915944	0.0286263	-1.58186
Zm00001d037480	-1.78759	4.30913	14.1459	0.00444208	0.0165336	-1.58194
Zm00001d019561	-1.78772	4.5446	12.7412	0.00598637	0.0207832	-1.58206
Zm00001d026199	-1.78791	4.67956	22.2666	0.00107786	0.00567901	-1.58222
Zm00001d016135	-1.78817	3.87773	14.9711	0.00376148	0.0145498	-1.58245
Zm00001d003262	-1.78846	3.45366	9.02121	0.0147983	0.0414132	-1.5827
Zm00001d002974	-1.78846	4.05973	14.6036	0.00404752	0.0153781	-1.58271
Zm00001d048114	-1.78901	4.22163	11.5298	0.00787831	0.025551	-1.58319
Zm00001d003669	-1.78962	4.02431	14.1878	0.00440403	0.0164216	-1.58374
Zm00001d003040	-1.78987	5.04622	24.4162	0.0007904	0.00451287	-1.58396
Zm00001d024690	-1.78996	4.2342	10.2236	0.0108149	0.032537	-1.58404
Zm00001d045661	-1.79005	2.7724	8.85222	0.0154943	0.0428955	-1.58412
Zm00001d009618	-1.79009	3.44108	9.76547	0.012155	0.0355732	-1.58415
Zm00001d012630	-1.79011	5.90426	27.3823	0.000532174	0.00335133	-1.58417
Zm00001d008882	-1.7902	3.16158	8.52381	0.0169661	0.0459482	-1.58424
Zm00001d037188	-1.7905	4.17603	12.3192	0.00657469	0.0223048	-1.58452
Zm00001d049925	-1.7906	3.64528	8.95547	0.0150644	0.0419657	-1.5846
Zm00001d003134	-1.79062	2.77293	8.49147	0.0171201	0.0463045	-1.58462
Zm00001d016145	-1.79114	2.77318	8.55294	0.0168287	0.0456811	-1.58508
Zm00001d033238	-1.79128	5.82883	28.6807	0.000452237	0.00296534	-1.5852
Zm00001d004383	-1.79184	5.78565	26.6807	0.000582563	0.00359574	-1.5857
Zm00001d050082	-1.792	5.02922	20.5629	0.00140085	0.0069023	-1.58584
Zm00001d015927	-1.79224	4.18913	18.1622	0.00208472	0.00934221	-1.58606
Zm00001d052112	-1.79262	3.85618	13.3981	0.00519369	0.0186599	-1.58639
Zm00001d035567	-1.79302	2.77476	8.77169	0.0158401	0.0436149	-1.58674
Zm00001d040873	-1.79326	4.16665	10.3027	0.0106022	0.0320325	-1.58696
Zm00001d042911	-1.79343	3.66072	9.21296	0.0140546	0.0397529	-1.58711
Zm00001d022320	-1.79356	3.85695	13.5042	0.005078	0.0183421	-1.58722
Zm00001d004330	-1.79368	2.79146	8.17534	0.0187211	0.0496262	-1.58733
Zm00001d011891	-1.79382	5.81659	9.72408	0.0122859	0.0358757	-1.58745
Zm00001d007167	-1.79422	4.45936	19.3836	0.00169544	0.00796535	-1.5878
Zm00001d005195	-1.79423	3.84496	10.793	0.00939309	0.0291794	-1.58781
Zm00001d014186	-1.79442	3.15023	10.495	0.0101064	0.0308924	-1.58798
Zm00001d049561	-1.79462	4.1794	11.4271	0.00807045	0.0260124	-1.58816
Zm00001d024337	-1.79519	4.55073	13.2456	0.0053656	0.019111	-1.58867
Zm00001d048814	-1.79532	4.94386	16.3294	0.00289781	0.0119637	-1.58878
Zm00001d006782	-1.79545	5.674	21.2937	0.00124952	0.0063391	-1.58889
Zm00001d021841	-1.79564	3.85866	13.4888	0.00509459	0.0183851	-1.58907
Zm00001d021842	-1.79564	3.85866	13.4888	0.00509459	0.0183851	-1.58907
Zm00001d032502	-1.79581	4.68604	22.4026	0.00105624	0.00558841	-1.58921
Zm00001d003875	-1.79605	5.22609	12.759	0.00596301	0.0207331	-1.58942
Zm00001d008193	-1.79685	4.68689	22.482	0.00104385	0.00552961	-1.59013
Zm00001d005349	-1.79687	3.87225	16.4595	0.00282854	0.0117418	-1.59015
Zm00001d043425	-1.79707	5.16268	18.7096	0.00189802	0.0086938	-1.59033
Zm00001d014790	-1.79734	3.44703	12.199	0.00675503	0.0227842	-1.59057
Zm00001d002423	-1.79735	4.20502	18.8453	0.00185495	0.00854255	-1.59057
Zm00001d012379	-1.79753	3.89805	12.3058	0.00659441	0.0223678	-1.59073
Zm00001d030507	-1.79828	4.20579	18.0089	0.00214095	0.00952004	-1.5914
Zm00001d021897	-1.79875	3.44818	11.8462	0.00732079	0.0242144	-1.59181
Zm00001d023402	-1.79911	3.15407	10.5735	0.00991238	0.030423	-1.59213
Zm00001d023422	-1.79914	2.77974	8.37998	0.0176647	0.0475017	-1.59216
Zm00001d027375	-1.80026	3.14026	9.91904	0.0116842	0.0345257	-1.59315
Zm00001d036762	-1.80058	3.42199	10.8107	0.0093529	0.0290845	-1.59344
Zm00001d029580	-1.80078	3.42216	10.8903	0.0091737	0.0286594	-1.59361
Zm00001d006868	-1.80082	4.20786	18.0316	0.00213252	0.00949118	-1.59365
Zm00001d030640	-1.80116	3.86319	10.6277	0.00978094	0.0301117	-1.59395
Zm00001d004592	-1.80118	3.14104	8.84911	0.0155074	0.0429189	-1.59396
Zm00001d001449	-1.80128	3.88849	11.5002	0.00793312	0.0256925	-1.59405
Zm00001d033434	-1.80163	2.78175	8.26246	0.0182621	0.0486998	-1.59436
Zm00001d017409	-1.80165	4.36598	17.8517	0.00220061	0.00972384	-1.59438
Zm00001d004410	-1.80171	4.05845	17.6964	0.00226155	0.00993883	-1.59444
Zm00001d006874	-1.80172	5.08422	21.4589	0.00121813	0.00621472	-1.59444
Zm00001d025834	-1.80208	5.50286	22.1567	0.00109574	0.00575002	-1.59476
Zm00001d053259	-1.80274	3.69472	12.1298	0.00686169	0.0230546	-1.59534
Zm00001d024403	-1.80308	4.78741	22.3043	0.00107182	0.00565327	-1.59565
Zm00001d028298	-1.80312	4.57852	20.1844	0.00148804	0.00722448	-1.59568
Zm00001d034188	-1.80328	4.48885	18.1552	0.00208725	0.00934831	-1.59582
Zm00001d003167	-1.80362	4.71328	21.9688	0.00112717	0.00586379	-1.59612
Zm00001d052259	-1.80369	5.85342	27.9963	0.000492388	0.00315926	-1.59619
Zm00001d041056	-1.80377	5.55266	24.9916	0.00072999	0.00425404	-1.59626
Zm00001d025804	-1.8039	3.43854	13.7434	0.00482869	0.0176273	-1.59637
Zm00001d018184	-1.80391	4.72395	18.8706	0.00184705	0.00851412	-1.59638
Zm00001d026312	-1.80393	4.19873	13.2872	0.00531808	0.0189746	-1.5964
Zm00001d052591	-1.80432	4.64385	9.60186	0.0126827	0.0367709	-1.59674
Zm00001d024205	-1.80436	4.89727	20.6335	0.00138528	0.00685387	-1.59678
Zm00001d021748	-1.8045	5.19277	21.4966	0.00121112	0.00619024	-1.5969
Zm00001d044934	-1.8046	3.70947	8.19465	0.0186181	0.0494302	-1.59699
Zm00001d018078	-1.8046	4.1876	14.5614	0.00408205	0.0154777	-1.59699
Zm00001d005776	-1.80486	4.21118	19.4474	0.00167768	0.00790095	-1.59722
Zm00001d009150	-1.80491	4.91738	12.8344	0.00586532	0.0204552	-1.59727
Zm00001d022637	-1.80505	3.42567	10.3537	0.010468	0.0317127	-1.59739
Zm00001d020843	-1.80511	5.33182	23.6703	0.000878102	0.00487328	-1.59744
Zm00001d039102	-1.80535	4.35768	16.0734	0.00304029	0.012417	-1.59766
Zm00001d011811	-1.80536	5.40082	25.6037	0.000671805	0.00400138	-1.59767
Zm00001d032130	-1.80537	3.45361	11.6671	0.00763025	0.0249745	-1.59767
Zm00001d035454	-1.80554	4.85871	15.1165	0.0036552	0.0142443	-1.59782
Zm00001d053963	-1.80583	3.44013	12.8488	0.00584686	0.0204035	-1.59808
Zm00001d032282	-1.80614	5.21212	26.6925	0.000581669	0.00359191	-1.59836
Zm00001d033778	-1.80744	3.90619	9.41754	0.0133113	0.0381245	-1.5995
Zm00001d045087	-1.80775	4.47047	17.104	0.00251377	0.0107502	-1.59978
Zm00001d010495	-1.80822	4.33736	16.3906	0.00286498	0.0118632	-1.6002
Zm00001d006762	-1.80858	3.6995	10.4089	0.010325	0.0313899	-1.60052
Zm00001d043299	-1.8089	3.88213	16.1413	0.0030017	0.0122991	-1.6008
Zm00001d043512	-1.80904	4.06447	17.0302	0.00254757	0.0108583	-1.60092
Zm00001d001326	-1.80906	4.44965	14.0418	0.00453833	0.0168034	-1.60094
Zm00001d035462	-1.80906	4.44965	14.0418	0.00453833	0.0168034	-1.60094
Zm00001d038425	-1.80962	4.47204	21.3218	0.00124412	0.0063229	-1.60144
Zm00001d008853	-1.80983	4.33866	14.0075	0.00457055	0.0168903	-1.60162
Zm00001d051948	-1.80989	4.59478	23.1153	0.000951166	0.00516163	-1.60167
Zm00001d005315	-1.81084	3.14891	9.50523	0.0130076	0.037463	-1.60251
Zm00001d021846	-1.81102	5.85234	28.383	0.000469188	0.00305195	-1.60267
Zm00001d027831	-1.81105	5.53971	13.2747	0.00533228	0.0190183	-1.6027
Zm00001d040440	-1.81147	4.35135	17.879	0.00219012	0.00968914	-1.60307
Zm00001d022500	-1.81154	3.14955	8.88978	0.0153361	0.0425592	-1.60313
Zm00001d003480	-1.81183	4.09109	11.8235	0.00735909	0.024314	-1.60339
Zm00001d026690	-1.81211	4.21714	20.2449	0.00147366	0.0071777	-1.60364
Zm00001d043469	-1.81295	4.59731	22.9356	0.000976411	0.00526285	-1.60438
Zm00001d024654	-1.81357	3.47424	9.17285	0.0142063	0.040095	-1.60493
Zm00001d041678	-1.81365	4.34184	15.0898	0.00367443	0.0143022	-1.605
Zm00001d005546	-1.81371	3.69053	15.3872	0.00346687	0.0136808	-1.60505
Zm00001d027576	-1.81432	3.47485	8.75533	0.0159115	0.0437679	-1.6056
Zm00001d053931	-1.81441	4.48699	18.3199	0.00202869	0.00915321	-1.60567
Zm00001d005781	-1.81554	4.08196	15.5527	0.00335764	0.0133684	-1.60668
Zm00001d042925	-1.81571	5.33892	15.8297	0.00318404	0.0128591	-1.60682
Zm00001d014003	-1.81574	4.25538	10.5105	0.0100677	0.030791	-1.60685
Zm00001d034471	-1.816	4.55718	9.17485	0.0141987	0.0400793	-1.60708
Zm00001d004439	-1.81624	4.05826	17.7586	0.00223689	0.00985038	-1.6073
Zm00001d019091	-1.81652	2.7941	9.12263	0.0143991	0.0405016	-1.60754
Zm00001d014517	-1.81687	3.8761	15.4084	0.00345264	0.0136397	-1.60785
Zm00001d034578	-1.81701	3.69323	13.7302	0.00484205	0.0176611	-1.60797
Zm00001d029518	-1.81706	4.36729	20.7886	0.00135184	0.00673035	-1.60802
Zm00001d010515	-1.81742	4.79922	23.4137	0.000911002	0.00500335	-1.60834
Zm00001d003099	-1.81747	3.43588	10.0356	0.0113415	0.0337555	-1.60838
Zm00001d012640	-1.81751	3.90181	10.6776	0.00966186	0.0298225	-1.60842
Zm00001d017117	-1.81767	4.07156	18.6149	0.0019288	0.00879971	-1.60856
Zm00001d026591	-1.81785	5.45226	20.2068	0.00148269	0.00720822	-1.60872
Zm00001d037567	-1.81807	4.07189	17.6797	0.00226823	0.00995475	-1.60891
Zm00001d023955	-1.8184	3.90254	16.1552	0.00299384	0.0122734	-1.60921
Zm00001d053865	-1.81851	4.2224	20.3705	0.00144437	0.00706847	-1.6093
Zm00001d053864	-1.81851	4.2224	20.3705	0.00144437	0.00706847	-1.6093
Zm00001d043112	-1.81873	3.69465	15.0635	0.00369345	0.014352	-1.60949
Zm00001d004649	-1.81883	4.62357	19.7038	0.00160852	0.00766002	-1.60958
Zm00001d047151	-1.81895	4.58089	15.7665	0.00322264	0.0129641	-1.60969
Zm00001d039192	-1.81949	3.70846	11.3667	0.00818619	0.0263139	-1.61017
Zm00001d043724	-1.81949	5.62584	20.1563	0.00149476	0.00724428	-1.61017
Zm00001d043709	-1.81963	2.79668	9.1412	0.0143274	0.0403523	-1.61029
Zm00001d050097	-1.81974	3.45155	13.4394	0.00514832	0.0185345	-1.61039
Zm00001d005945	-1.82026	3.46583	12.9603	0.00570651	0.0200299	-1.61085
Zm00001d002999	-1.82037	4.52499	13.564	0.00501422	0.0181553	-1.61095
Zm00001d020607	-1.82083	3.43864	11.2535	0.0084085	0.0268542	-1.61136
Zm00001d015971	-1.82084	4.06204	18.3524	0.00201741	0.00911679	-1.61136
Zm00001d005733	-1.82122	3.67044	11.2366	0.00844238	0.0269382	-1.6117
Zm00001d034925	-1.82187	3.43949	10.7793	0.00942455	0.0292608	-1.61228
Zm00001d031108	-1.822	3.4396	10.1955	0.0108918	0.0327107	-1.61239
Zm00001d042169	-1.82229	3.88055	9.02068	0.0148004	0.0414162	-1.61264
Zm00001d037993	-1.82232	5.16509	25.2538	0.000704334	0.0041394	-1.61267
Zm00001d010331	-1.82258	3.69781	15.6614	0.00328812	0.0131491	-1.6129
Zm00001d025404	-1.82262	3.18814	9.17886	0.0141834	0.0400477	-1.61293
Zm00001d048985	-1.82262	3.46777	12.7372	0.00599167	0.0207957	-1.61294
Zm00001d036425	-1.82361	6.2326	26.4306	0.000601925	0.00368963	-1.61381
Zm00001d015553	-1.82412	3.88205	11.5979	0.00775399	0.0252566	-1.61426
Zm00001d027487	-1.82421	3.68601	14.7484	0.00393172	0.0150462	-1.61435
Zm00001d023872	-1.82424	4.23883	17.4622	0.00235735	0.0102492	-1.61437
Zm00001d022050	-1.82465	3.7127	12.3214	0.0065714	0.0222975	-1.61473
Zm00001d053552	-1.8254	3.16085	10.1609	0.0109872	0.0329239	-1.6154
Zm00001d003491	-1.82543	3.16092	9.62171	0.0126172	0.0366461	-1.61543
Zm00001d028840	-1.82545	6.765	15.0678	0.00369037	0.0143443	-1.61544
Zm00001d051815	-1.82576	2.80161	9.28215	0.0137977	0.0391875	-1.61571
Zm00001d050723	-1.82589	3.19083	8.95912	0.0150494	0.0419391	-1.61583
Zm00001d021879	-1.82628	4.07863	18.8017	0.00186867	0.00859147	-1.61618
Zm00001d003904	-1.82651	3.17656	11.782	0.00742979	0.0245025	-1.61638
Zm00001d024200	-1.82684	3.70131	14.5511	0.00409058	0.0155055	-1.61667
Zm00001d030053	-1.82724	6.04483	23.8069	0.000861179	0.00480869	-1.61703
Zm00001d004763	-1.82752	3.44413	11.0108	0.00891076	0.0280164	-1.61728
Zm00001d041702	-1.82761	3.1627	10.8517	0.00926015	0.0288443	-1.61735
Zm00001d021871	-1.82823	4.09238	16.2374	0.00294805	0.0121327	-1.6179
Zm00001d023871	-1.8284	3.17813	10.728	0.00954342	0.0295268	-1.61805
Zm00001d018034	-1.82846	4.06831	16.199	0.00296936	0.0121941	-1.61811
Zm00001d010300	-1.82896	4.92746	17.3598	0.00240084	0.0103927	-1.61855
Zm00001d034380	-1.82928	4.82927	23.6856	0.000876186	0.00486748	-1.61883
Zm00001d009608	-1.8293	5.2974	27.6695	0.000513092	0.00326268	-1.61885
Zm00001d009296	-1.82962	3.7036	14.1019	0.00448247	0.0166427	-1.61914
Zm00001d016733	-1.82962	3.17906	9.71485	0.0123154	0.0359402	-1.61914
Zm00001d016906	-1.82964	6.31374	27.1316	0.000549541	0.00343912	-1.61915
Zm00001d015767	-1.82978	3.45981	10.6497	0.00972818	0.0299867	-1.61927
Zm00001d021669	-1.82984	4.40057	13.5937	0.00498288	0.0180703	-1.61933
Zm00001d046937	-1.82993	3.71703	12.9096	0.00576974	0.0202065	-1.61941
Zm00001d014369	-1.83014	4.06969	16.8754	0.00262028	0.0110989	-1.6196
Zm00001d008585	-1.83065	3.71762	12.9048	0.00577588	0.0202226	-1.62004
Zm00001d045607	-1.83066	4.04596	10.6457	0.0097378	0.0300048	-1.62005
Zm00001d003010	-1.83093	3.16547	9.58483	0.0127392	0.0368965	-1.62029
Zm00001d042765	-1.83106	4.05836	15.214	0.00358594	0.0140388	-1.62041
Zm00001d029135	-1.83107	5.86911	16.649	0.0027312	0.0114498	-1.62042
Zm00001d027046	-1.83109	3.16557	8.86508	0.0154399	0.0427834	-1.62043
Zm00001d022239	-1.83149	5.41398	21.2243	0.00126301	0.00639068	-1.62079
Zm00001d053943	-1.83179	4.90008	21.5096	0.0012087	0.00618435	-1.62105
Zm00001d009127	-1.83251	4.04748	10.0962	0.0111685	0.0333723	-1.62169
Zm00001d052585	-1.83263	5.243	26.6885	0.000581976	0.00359324	-1.62179
Zm00001d050616	-1.83343	4.2113	14.9651	0.0037659	0.0145599	-1.62251
Zm00001d013582	-1.83349	3.73317	8.65241	0.01637	0.044696	-1.62255
Zm00001d052853	-1.83393	5.44128	28.6178	0.000455755	0.00298249	-1.62295
Zm00001d015877	-1.83413	4.90206	16.1577	0.00299247	0.0122696	-1.62312
Zm00001d043506	-1.8342	4.49225	21.8095	0.00115466	0.00597502	-1.62318
Zm00001d024598	-1.83448	4.38163	20.0009	0.00153269	0.00738341	-1.62343
Zm00001d000880	-1.83472	3.45005	11.4803	0.00797016	0.0257677	-1.62365
Zm00001d010644	-1.83483	4.88282	15.5058	0.00338816	0.013457	-1.62374
Zm00001d002115	-1.83532	3.4782	11.6357	0.00768604	0.0251022	-1.62417
Zm00001d016697	-1.83536	4.65865	13.3087	0.00529361	0.0189166	-1.62421
Zm00001d009714	-1.83557	4.62663	23.2933	0.000926953	0.00506182	-1.6244
Zm00001d025571	-1.83558	3.69535	11.1175	0.00868558	0.0275043	-1.6244
Zm00001d042685	-1.83578	4.59474	18.0628	0.00212098	0.00945513	-1.62458
Zm00001d053342	-1.83587	3.46481	13.17	0.00545342	0.0193434	-1.62466
Zm00001d047482	-1.83626	3.72222	9.13069	0.0143679	0.0404256	-1.62501
Zm00001d012273	-1.83652	5.65129	24.7976	0.000749709	0.00433986	-1.62524
Zm00001d014938	-1.83712	3.88021	11.432	0.00806118	0.0259876	-1.62577
Zm00001d023327	-1.83729	3.18535	8.18051	0.0186935	0.0495697	-1.62592
Zm00001d015575	-1.83794	2.81169	8.62165	0.0165102	0.0450002	-1.62649
Zm00001d028207	-1.83816	2.81182	8.34109	0.0178597	0.0478878	-1.62669
Zm00001d038838	-1.83847	4.72119	21.1544	0.00127677	0.00644497	-1.62697
Zm00001d007967	-1.83848	2.82826	8.43235	0.0174063	0.0469035	-1.62698
Zm00001d044586	-1.83858	3.91912	16.5284	0.00279265	0.0116318	-1.62706
Zm00001d010859	-1.83887	4.80675	20.6072	0.00139106	0.0068712	-1.62732
Zm00001d003116	-1.83896	4.23923	16.7669	0.00267274	0.0112675	-1.6274
Zm00001d002013	-1.83898	4.79673	16.6804	0.00271551	0.0114036	-1.62742
Zm00001d039138	-1.83906	4.21593	15.3793	0.00347224	0.0136964	-1.62748
Zm00001d047453	-1.83919	4.07713	18.0482	0.00212635	0.00947344	-1.6276
Zm00001d036600	-1.83927	4.37421	22.0049	0.00112104	0.00584257	-1.62767
Zm00001d049299	-1.83928	4.39693	18.6021	0.00193302	0.00881485	-1.62768
Zm00001d019163	-1.8397	4.59802	14.6876	0.00397982	0.0151827	-1.62805
Zm00001d003661	-1.83995	2.81327	9.53049	0.0129217	0.0372787	-1.62828
Zm00001d025136	-1.83995	4.47506	13.7734	0.00479849	0.0175431	-1.62828
Zm00001d025208	-1.84	4.2518	19.396	0.00169198	0.0079501	-1.62832
Zm00001d043265	-1.84008	3.69905	15.5675	0.00334808	0.0133371	-1.62839
Zm00001d023629	-1.84045	4.8182	22.4157	0.00105418	0.00557826	-1.62872
Zm00001d042847	-1.84091	4.34166	10.8088	0.00935724	0.0290957	-1.62913
Zm00001d006063	-1.84244	3.20438	9.35684	0.0135267	0.0385917	-1.63048
Zm00001d044844	-1.84254	3.45648	9.7032	0.0123526	0.0360178	-1.63056
Zm00001d033648	-1.84348	3.72816	12.2849	0.00662546	0.0224595	-1.6314
Zm00001d044774	-1.84362	3.20536	9.50641	0.0130036	0.0374613	-1.63152
Zm00001d006502	-1.84374	5.94888	12.2882	0.00662062	0.0224451	-1.63162
Zm00001d048370	-1.84393	3.70222	15.3072	0.00352126	0.013859	-1.63179
Zm00001d009447	-1.84512	3.9119	15.0095	0.00373301	0.0144583	-1.63285
Zm00001d006842	-1.8452	5.20238	21.3987	0.00122946	0.00626107	-1.63292
Zm00001d045559	-1.84527	5.12018	21.1404	0.00127954	0.00645394	-1.63298
Zm00001d036300	-1.84556	4.58152	10.1675	0.0109689	0.032879	-1.63324
Zm00001d019813	-1.84564	2.81802	8.63322	0.0164573	0.0448858	-1.63331
Zm00001d009436	-1.84587	4.37963	21.1976	0.00126825	0.00641022	-1.63351
Zm00001d039233	-1.84598	4.23331	17.5944	0.00230266	0.0100731	-1.63361
Zm00001d026344	-1.84624	5.19135	10.6929	0.00962573	0.0297509	-1.63384
Zm00001d016512	-1.84747	4.24621	20.237	0.00147553	0.0071832	-1.63493
Zm00001d002919	-1.84813	4.37019	19.5172	0.0016585	0.00782851	-1.63552
Zm00001d041259	-1.84814	4.60496	15.5484	0.00336039	0.0133713	-1.63552
Zm00001d028569	-1.84858	4.72948	24.4597	0.000785625	0.00449214	-1.63591
Zm00001d022293	-1.84892	3.69323	9.66406	0.0124788	0.0363198	-1.63621
Zm00001d033365	-1.84933	5.11413	24.9394	0.000735226	0.00427563	-1.63658
Zm00001d045793	-1.84943	4.50478	19.4835	0.00166772	0.00786063	-1.63667
Zm00001d047999	-1.85057	3.73399	8.36512	0.0177389	0.0476684	-1.63767
Zm00001d014568	-1.85065	5.80407	26.9324	0.00056384	0.00350338	-1.63774
Zm00001d019490	-1.85112	4.742	25.0433	0.000724842	0.00422907	-1.63816
Zm00001d045418	-1.85129	3.91697	18.3713	0.00201084	0.00909551	-1.63831
Zm00001d034692	-1.85146	3.197	9.89848	0.0117459	0.034661	-1.63846
Zm00001d005937	-1.85154	2.82276	9.54199	0.0128828	0.0371994	-1.63853
Zm00001d005939	-1.85154	2.82276	9.54199	0.0128828	0.0371994	-1.63853
Zm00001d009543	-1.85157	3.70851	12.7159	0.00601983	0.020862	-1.63855
Zm00001d006567	-1.85166	5.60506	19.837	0.00157395	0.00753486	-1.63863
Zm00001d023556	-1.85172	2.83911	8.40977	0.0175171	0.0471632	-1.63869
Zm00001d028736	-1.85179	5.73579	28.5524	0.000459449	0.00300107	-1.63875
Zm00001d007209	-1.8518	4.8174	19.6516	0.0016223	0.00770037	-1.63876
Zm00001d028855	-1.85184	3.69564	11.2818	0.00835213	0.0267222	-1.6388
Zm00001d032927	-1.85185	3.18269	9.19504	0.0141222	0.0398978	-1.6388
zma-MIR169f	-1.85213	2.82324	9.22791	0.0139986	0.0396289	-1.63905
Zm00001d035682	-1.85309	3.72289	15.9956	0.00308533	0.0125629	-1.6399
Zm00001d003705	-1.85318	3.93113	16.7068	0.00270237	0.0113703	-1.63998
Zm00001d010209	-1.8534	3.19864	12.506	0.00630582	0.0216214	-1.64018
Zm00001d036370	-1.85416	3.47985	9.79566	0.0120606	0.0353657	-1.64085
Zm00001d020547	-1.85575	5.08185	15.2832	0.0035378	0.0139032	-1.64226
Zm00001d043272	-1.85584	3.48124	11.2038	0.00850848	0.0271093	-1.64234
Zm00001d010500	-1.856	3.92085	15.5322	0.00337091	0.0134062	-1.64248
Zm00001d032906	-1.85616	3.4815	8.96362	0.0150311	0.0419028	-1.64262
Zm00001d038487	-1.85641	3.89609	8.95963	0.0150474	0.0419362	-1.64284
Zm00001d037609	-1.85667	4.74658	24.9133	0.000737872	0.00428656	-1.64307
Zm00001d041258	-1.85667	4.61199	15.8104	0.00319575	0.0128901	-1.64308
Zm00001d005784	-1.85732	3.89683	11.8668	0.00728622	0.0241144	-1.64364
Zm00001d005498	-1.85733	5.32061	26.1363	0.000625731	0.0037916	-1.64366
Zm00001d008562	-1.85764	3.9222	13.5732	0.00500449	0.0181251	-1.64393
Zm00001d028184	-1.858	7.31734	12.6765	0.00607228	0.0210047	-1.64425
Zm00001d016624	-1.85814	3.18779	9.54326	0.0128785	0.0371994	-1.64437
Zm00001d046060	-1.8585	5.1028	24.9718	0.000731975	0.00426179	-1.64469
Zm00001d046132	-1.85855	3.48346	13.6977	0.00487509	0.0177567	-1.64473
Zm00001d029576	-1.85913	3.92342	18.1517	0.00208851	0.0093516	-1.64525
Zm00001d010466	-1.85934	5.48662	16.5868	0.00276268	0.0115397	-1.64543
Zm00001d010716	-1.8595	4.97245	16.7863	0.00266326	0.0112336	-1.64558
Zm00001d001968	-1.8596	3.72825	15.8717	0.00315869	0.0127765	-1.64566
Zm00001d027557	-1.8596	3.20375	10.9854	0.00896538	0.0281577	-1.64566
Zm00001d006637	-1.85979	5.84193	29.3383	0.000417368	0.00278906	-1.64583
Zm00001d003319	-1.85993	4.3686	15.4697	0.00341192	0.0135157	-1.64596
Zm00001d042612	-1.86002	3.48467	13.426	0.00516295	0.0185752	-1.64604
Zm00001d022733	-1.86013	4.08227	15.4806	0.00340469	0.013498	-1.64614
Zm00001d014858	-1.86057	3.92461	18.567	0.00194461	0.00885017	-1.64653
Zm00001d020432	-1.86061	4.49204	14.56	0.00408322	0.0154806	-1.64656
Zm00001d011911	-1.8607	4.61529	18.0094	0.00214079	0.00952004	-1.64664
Zm00001d045495	-1.86129	3.2051	11.1486	0.00862108	0.0273923	-1.64716
Zm00001d032173	-1.86182	2.83119	9.55358	0.0128437	0.0371332	-1.64762
Zm00001d013951	-1.86222	3.70418	11.1117	0.00869757	0.0275324	-1.64798
Zm00001d006582	-1.86224	4.98929	14.73	0.00394619	0.0150839	-1.648
Zm00001d037209	-1.86244	3.20605	12.1176	0.00688061	0.0230996	-1.64818
Zm00001d038552	-1.86264	3.92631	18.5448	0.00195199	0.00887652	-1.64835
Zm00001d023259	-1.86274	4.94534	22.9312	0.00097703	0.0052629	-1.64844
Zm00001d053599	-1.86303	3.47336	11.106	0.00870937	0.0275564	-1.6487
Zm00001d046718	-1.86339	4.24764	19.6926	0.00161147	0.00767038	-1.64902
Zm00001d026358	-1.86375	7.49112	24.705	0.000759345	0.00438009	-1.64933
Zm00001d021821	-1.86377	4.84762	23.8604	0.00085467	0.00478532	-1.64935
Zm00001d038589	-1.86388	3.19256	10.3239	0.0105461	0.0318951	-1.64945
Zm00001d027054	-1.86393	5.2599	24.5085	0.000780313	0.00446875	-1.6495
Zm00001d005802	-1.86455	5.01049	19.5578	0.00164747	0.00778771	-1.65004
Zm00001d023269	-1.86458	4.07388	9.21859	0.0140335	0.039696	-1.65007
Zm00001d010867	-1.86476	3.73249	15.7494	0.00323321	0.0129893	-1.65023
Zm00001d038378	-1.86545	4.62988	21.4939	0.00121162	0.00619196	-1.65085
Zm00001d026712	-1.86637	3.50372	13.7464	0.00482564	0.0176192	-1.65166
Zm00001d009506	-1.8664	4.39654	20.1332	0.00150033	0.00726151	-1.65168
Zm00001d049741	-1.86651	4.86002	24.8844	0.000740805	0.00429913	-1.65178
Zm00001d052827	-1.86652	4.87017	21.4281	0.00122391	0.00623852	-1.65179
Zm00001d044644	-1.86656	5.45155	20.5034	0.00141413	0.00694655	-1.65182
Zm00001d035842	-1.86689	5.19276	26.2045	0.000620112	0.00376523	-1.65212
Zm00001d030941	-1.86704	4.08796	14.6414	0.00401692	0.0152945	-1.65225
Zm00001d045987	-1.86839	3.19625	11.339	0.00823992	0.0264497	-1.65344
Zm00001d050755	-1.86854	4.48763	10.7694	0.00944744	0.0293087	-1.65357
Zm00001d040920	-1.86854	3.47789	11.9244	0.00719044	0.0238797	-1.65357
Zm00001d047310	-1.86898	4.50996	17.7366	0.00224556	0.00988186	-1.65397
Zm00001d028782	-1.86906	5.31266	22.8162	0.000993627	0.00532745	-1.65404
Zm00001d013071	-1.86922	3.21163	9.93419	0.0116389	0.0344315	-1.65418
Zm00001d002810	-1.86928	4.24082	15.7889	0.00320889	0.0129274	-1.65423
Zm00001d028290	-1.86933	2.83737	9.6571	0.0125014	0.0363666	-1.65427
Zm00001d027733	-1.86936	3.19704	8.9106	0.0152494	0.0423695	-1.6543
Zm00001d000515	-1.86944	3.49242	14.9894	0.00374789	0.0145059	-1.65437
Zm00001d020307	-1.86948	3.21191	9.41373	0.0133247	0.038143	-1.65441
Zm00001d037305	-1.86988	3.21216	11.791	0.00741442	0.0244642	-1.65476
Zm00001d050406	-1.87045	3.72405	16.2101	0.00296318	0.0121719	-1.65526
Zm00001d017522	-1.87111	4.64515	16.1151	0.00301654	0.0123445	-1.65585
Zm00001d029366	-1.87129	4.69918	9.30908	0.0136992	0.0389616	-1.65601
Zm00001d014707	-1.87156	4.67779	17.8129	0.00221564	0.00977659	-1.65625
Zm00001d009754	-1.87208	5.15089	12.068	0.00695854	0.0233079	-1.65671
Zm00001d018680	-1.87227	3.75184	13.8608	0.00471176	0.0172987	-1.65688
Zm00001d014901	-1.87272	3.19985	10.8076	0.00935991	0.0290986	-1.65728
Zm00001d012747	-1.8728	3.19983	9.67704	0.0124368	0.0362189	-1.65734
Zm00001d008569	-1.87294	3.96002	13.3243	0.00527604	0.0188728	-1.65747
Zm00001d040898	-1.87362	5.69758	30.3463	0.000370071	0.00256487	-1.65807
Zm00001d044052	-1.87372	4.51382	18.6781	0.00190821	0.00872915	-1.65816
Zm00001d029571	-1.87393	4.40277	22.8219	0.000992796	0.00532476	-1.65834
Zm00001d002031	-1.87408	3.93574	18.7201	0.00189465	0.00868402	-1.65848
Zm00001d040010	-1.87415	4.40295	21.2319	0.00126152	0.00638443	-1.65854
Zm00001d000085	-1.87418	5.71344	20.4182	0.00143342	0.00702543	-1.65856
Zm00001d032199	-1.87433	4.26836	21.7723	0.0011612	0.00600172	-1.6587
Zm00001d017252	-1.87481	4.10645	16.4642	0.00282608	0.0117344	-1.65912
Zm00001d011810	-1.87541	5.38995	25.7259	0.000660875	0.00395071	-1.65965
Zm00001d008156	-1.87547	4.65954	24.3235	0.000800703	0.00455737	-1.65971
Zm00001d000483	-1.87571	3.9623	13.1872	0.00543326	0.0192923	-1.65992
Zm00001d006476	-1.87609	4.40457	20.1965	0.00148513	0.00721472	-1.66025
Zm00001d050195	-1.87688	5.34276	10.1788	0.0109378	0.0328046	-1.66095
Zm00001d044502	-1.87703	5.22889	14.0551	0.0045259	0.0167705	-1.66109
Zm00001d006011	-1.87704	3.95077	17.1438	0.00249577	0.0106978	-1.6611
Zm00001d014187	-1.87725	5.71118	18.4062	0.00199885	0.00904964	-1.66129
Zm00001d010425	-1.87742	3.48522	11.6743	0.00761739	0.0249524	-1.66144
Zm00001d015010	-1.87746	3.71674	11.9997	0.00706771	0.0235747	-1.66147
Zm00001d043839	-1.87755	3.49909	15.043	0.00370847	0.014396	-1.66155
Zm00001d052663	-1.87774	4.27116	21.4716	0.00121577	0.00620667	-1.66171
Zm00001d013505	-1.87777	4.10888	15.0913	0.00367335	0.0142994	-1.66174
Zm00001d032735	-1.87801	3.93897	18.9356	0.00182696	0.0084388	-1.66196
Zm00001d046225	-1.87841	3.9142	11.8212	0.00736299	0.0243212	-1.66231
Zm00001d046552	-1.87844	4.27174	20.7065	0.00136942	0.00679435	-1.66234
Zm00001d026580	-1.8786	5.16555	18.1979	0.00207186	0.00929627	-1.66248
Zm00001d005821	-1.87865	4.10962	19.6086	0.00163378	0.00774416	-1.66253
Zm00001d005822	-1.87865	4.10962	19.6086	0.00163378	0.00774416	-1.66253
Zm00001d008548	-1.87875	4.15836	9.23929	0.0139562	0.03955	-1.66261
Zm00001d024601	-1.8792	4.15874	9.21239	0.0140568	0.0397561	-1.66301
Zm00001d031909	-1.87928	4.27246	14.2409	0.00435642	0.016293	-1.66308
Zm00001d009999	-1.87929	4.86042	26.3466	0.000608602	0.00371949	-1.66309
Zm00001d021891	-1.87957	3.50075	14.9298	0.00379236	0.014636	-1.66333
Zm00001d012578	-1.87969	3.50086	12.4957	0.00632034	0.0216617	-1.66345
Zm00001d000696	-1.87973	2.84614	8.60896	0.0165685	0.0451119	-1.66348
Zm00001d011752	-1.88001	3.92805	16.878	0.00261902	0.011096	-1.66372
Zm00001d006013	-1.88001	4.13501	17.3583	0.00240148	0.0103927	-1.66372
Zm00001d001944	-1.88011	4.65268	21.1292	0.00128177	0.00646269	-1.66382
Zm00001d032639	-1.88017	3.48747	12.2717	0.00664515	0.0225107	-1.66386
Zm00001d022146	-1.881	4.25048	16.4743	0.00282081	0.0117175	-1.6646
Zm00001d024349	-1.88102	6.47702	18.8399	0.00185665	0.00854828	-1.66462
Zm00001d009542	-1.88103	3.73276	13.702	0.00487079	0.0177427	-1.66463
Zm00001d051245	-1.88156	4.27432	21.7354	0.00116774	0.0060266	-1.6651
Zm00001d030550	-1.88198	4.42076	22.829	0.000991757	0.00531992	-1.66547
Zm00001d012363	-1.88208	4.53171	22.1629	0.00109472	0.00574695	-1.66556
Zm00001d002365	-1.88269	4.38735	15.5937	0.00333121	0.0132861	-1.66609
Zm00001d049364	-1.88279	5.0546	26.3151	0.00061113	0.00373086	-1.66618
Zm00001d024951	-1.88303	4.56563	15.5305	0.00337202	0.0134093	-1.6664
Zm00001d006061	-1.88366	3.95622	17.5581	0.00231754	0.0101167	-1.66695
Zm00001d051429	-1.88405	2.84966	8.31185	0.018008	0.0481799	-1.6673
Zm00001d019627	-1.88451	5.75555	14.7465	0.00393326	0.0150491	-1.66771
Zm00001d017077	-1.88454	3.49109	9.5811	0.0127516	0.0369269	-1.66774
Zm00001d011167	-1.88495	3.74911	11.9153	0.00720547	0.02392	-1.6681
Zm00001d023371	-1.88547	3.97034	13.0398	0.00560892	0.0197866	-1.66856
Zm00001d011363	-1.88557	4.67857	14.0911	0.00449246	0.0166735	-1.66865
Zm00001d040771	-1.88594	2.85098	9.07481	0.0145857	0.0409455	-1.66898
Zm00001d023333	-1.88601	4.27799	20.5373	0.00140654	0.00691794	-1.66903
Zm00001d023335	-1.88601	4.27799	20.5373	0.00140654	0.00691794	-1.66903
Zm00001d051659	-1.88631	3.2404	9.15117	0.0142891	0.0402748	-1.6693
Zm00001d006699	-1.88641	3.92081	9.83588	0.0119363	0.0350906	-1.66939
Zm00001d032196	-1.88701	4.3023	16.2306	0.00295185	0.0121432	-1.66992
Zm00001d041926	-1.88752	3.92172	12.3519	0.00652654	0.0221915	-1.67038
Zm00001d003251	-1.88768	3.49367	11.6599	0.00764296	0.0249969	-1.67051
Zm00001d038004	-1.88769	3.49369	9.71933	0.012301	0.0359119	-1.67052
Zm00001d017903	-1.88772	3.73828	12.5718	0.00621443	0.021383	-1.67055
Zm00001d050696	-1.88778	5.31578	18.6978	0.00190182	0.00870607	-1.6706
Zm00001d012413	-1.888	3.49393	12.3591	0.00651603	0.0221596	-1.67079
Zm00001d045297	-1.8883	4.83738	13.5845	0.00499257	0.0180943	-1.67106
Zm00001d048252	-1.88901	3.75246	17.0522	0.00253742	0.0108348	-1.67169
Zm00001d014018	-1.88946	5.30808	23.3744	0.000916162	0.00502393	-1.67209
Zm00001d008975	-1.88954	3.94847	9.12896	0.0143746	0.0404386	-1.67216
Zm00001d020254	-1.89037	2.85473	10.2234	0.0108155	0.032537	-1.67289
Zm00001d003856	-1.89048	4.11938	20.2196	0.00147966	0.00719704	-1.67299
Zm00001d037768	-1.89073	4.1317	19.9756	0.00153897	0.0074057	-1.67322
Zm00001d053066	-1.89076	4.43939	19.4416	0.00167929	0.00790565	-1.67324
Zm00001d031969	-1.89157	3.49689	11.2873	0.0083413	0.0266941	-1.67396
Zm00001d004078	-1.8922	3.97588	13.8258	0.00474625	0.0173911	-1.67451
Zm00001d026289	-1.8925	3.23078	12.6163	0.00615351	0.0212219	-1.67478
[truncated: 5,846 more rows]
